# Supplementary material
Source: ML conference proceedings conference paper supplement (https://openreview.net/forum?id=MY8SBpUece)
Supplement: supplementary_material [file attachment]

# A THEORY OF NON-LINEAR FEATURE LEARNING WITH ONE GRADIENT STEP IN TWO-LAYER NEURAL NETWORKS

**Anonymous authors**

Paper under double-blind review

## ABSTRACT

Feature learning is thought to be one of the fundamental reasons for the success of deep neural networks. It is rigorously known that in two-layer fully-connected neural networks under certain conditions, one step of gradient descent on the first layer followed by ridge regression on the second layer can lead to feature learning; characterized by the appearance of a separated rank-one component—spike—in the spectrum of the feature matrix. However, with a constant gradient descent step size, this spike only carries information from the linear component of the target function and therefore learning non-linear components is impossible. We show that with a learning rate that grows with the sample size, such training in fact introduces multiple rank-one components, each corresponding to a specific polynomial feature. We further prove that the limiting large-dimensional and large sample training and test errors of the updated neural networks are fully characterized by these spikes. By precisely analyzing the improvement in the loss, we demonstrate that these non-linear features can enhance learning.

## 1 INTRODUCTION

Learning non-linear features—or representations—from data is thought to be one of the fundamental reasons for the success of deep neural networks (e.g., Bengio et al., 2013; Donahue et al., 2016; Yang & Hu, 2021; Shi et al., 2022; Radhakrishnan et al., 2022, etc.). This has been observed in a wide range of domains, including computer vision and natural language processing. At the same time, the current theoretical understanding of feature learning is incomplete. In particular, among many theoretical approaches to study neural nets, much work has focused on two-layer fully-connected neural networks with a randomly generated, untrained first layer and a trained second layer—or *random features models* (Rahimi & Recht, 2007). Despite their simplicity, random features models can capture various empirical properties of deep neural networks, and have been used to study generalization, overparametrization and “double descent”, adversarial robustness, transfer learning, estimation of out-of-distribution performance, and uncertainty quantification (see e.g., Mei & Montanari (2022); Hassani & Javanmard (2022); Tripuraneni et al. (2021); Lee et al. (2023); Bombari & Mondelli (2023); Clarté et al. (2023); Lin & Dobriban (2021); Adlam et al. (2022), etc.).

Nevertheless, feature learning is absent in random features models, because the first layer weights are assumed to be randomly generated, and then fixed. Although these models can represent non-linear functions of the data, in the commonly studied setting where the sample size, dimension, and hidden layer size are proportional, under certain reasonable conditions they can only learn the *linear* component of the true model—or, teacher function—and other components of the teacher function effectively behave as Gaussian noise. Thus, in this setting, learning in a random features model is equivalent to learning in a *noisy linear model* with Gaussian features and Gaussian noise. This property is known as the *Gaussian equivalence property* (see e.g., Adlam et al. (2022); Adlam & Pennington (2020a); Hu & Lu (2023); Mei & Montanari (2022); Montanari & Saeed (2022)). While other models such as the neural tangent kernel (Jacot et al., 2018; Du et al., 2019) can be more expressive, they also lack feature learning.

To bridge the gap between random features models and feature learning, several recent approaches have shown provable feature learning for neural nets under certain conditions; see Section 1.1 for

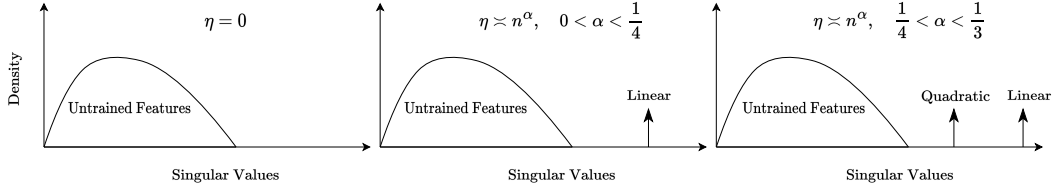

Figure 1: Spectrum of the updated feature matrix for different regimes of the gradient step size  $\eta$ . Spikes corresponding to monomial features are added to the spectrum of the initial matrix. The number of spikes depends on the range  $\alpha$ . See Theorems 3.3 and 3.4 for more details.

details. In particular, the recent pioneering work of Ba et al. (2022) analyzed two-layer neural networks, trained with one gradient step on the first layer. They showed that when the step size is small, after one gradient step, the resulting two-layer neural network can learn linear features. However, it still behaves as a noisy linear model and does not capture non-linear components of a teacher function. Moreover, they showed that for a sufficiently large step size, under certain conditions, the one-step updated random features model can outperform linear and kernel predictors. However, the effects of a large gradient step size on the features is unknown. What happens in the intermediate step size regime also remains unexplored. In this paper, we focus on the following key questions in this area:

*What nonlinear features are learned by a two-layer neural network after one gradient update? How are these features reflected in the singular values and vectors of the feature matrix, and how does this depend on the scaling of the step size? What exactly is the improvement in the loss due to the nonlinear features learned?*

**Main Contributions.** Toward answering the above questions, we make the following contributions:

- We study feature learning in two-layer fully-connected neural networks. Specifically, we follow the training procedure introduced in Ba et al. (2022) where one step of gradient descent with step size  $\eta$  is applied to the first layer weights, and the second layer weights are found by solving ridge regression on the updated features. We consider a step size  $\eta \asymp n^\alpha$ ,  $\alpha \in (0, \frac{1}{2})$  that grows with the sample size  $n$  and examine how the learned features change with  $\alpha$  (Section 2.1).
- In Section 3, we present a spectral analysis of the updated feature matrix. We first show that the spectrum of the feature matrix undergoes phase transitions depending on the range of  $\alpha$ . In particular, we find that if  $\alpha \in (\frac{\ell-1}{2\ell}, \frac{\ell}{2\ell+2})$  for some  $\ell \in \{1, 2, \dots\}$ , then  $\ell$  separated singular values—*spikes*—will be added to the spectrum of the initial feature matrix (Theorem 3.3). Figure 1 illustrates this finding.
- Building on perturbation theory for singular vectors, we argue that the left singular vectors (principal components) associated with the  $\ell$  spikes are asymptotically aligned with polynomial features of different degrees (Theorem 3.4). In other words, the updated feature matrix will contain information about the degree- $\ell$  polynomial component of the target function.
- In Section 4.1, we establish equivalence theorems (Theorem 4.1 and 4.2) which state that the training and test errors of the updated neural networks are fully characterized by the initial feature matrix and the  $\ell$  spikes.
- We use the equivalence theorems from Section 4.1 to fully characterize asymptotics of the training loss for different  $\ell$  (Theorem 4.4). Notably, we show that in the simple case where  $\ell = 1$ , the neural network does not learn non-linear functions. However, in the  $\ell = 2$  regime, the neural network in fact learns quadratic components of the target function (Corollary 4.5).

## 1.1 RELATED WORKS

**Theory of shallow neural networks.** Random features models (Rahimi & Recht, 2007) have been used to study various aspects of deep learning, such as generalization (Mei & Montanari, 2022; Adlam et al., 2022; Lin & Dobriban, 2021; Mel & Pennington, 2021), adversarial robustness (Hassani & Javanmard, 2022; Bombari et al., 2023), transfer learning (Tripuraneni et al., 2021), out-of-distribution performance estimation (Lee et al., 2023), uncertainty quantification (Clarté et al., 2023), stability, and privacy (Bombari & Mondelli, 2023). [This line of work builds upon nonlinear random matrix theory \(see e.g., Pennington & Worah \(2017\); Louart et al. \(2018\); Fan & Wang \(2020\); Benigni & Pécché \(2021\), etc.\) studying the spectrum of the feature matrix of two-layer neural networks at initialization.](#) See Section A for more discussion on related work in deep learning theory.

**Feature learning.** The problem of feature learning has been gaining a lot of attention recently (see e.g., Damian et al. (2022); Nichani et al. (2023); Zhenmei et al. (2022), etc.). Please refer to Section A for a more detailed discussion of the prior work.

Wang et al. (2022) empirically show that if learning rate is sufficiently large, an outlier in the spectrum of the weight and feature matrix emerges with the corresponding singular vector aligned to the structure of the training data. Recently, Ba et al. (2022) show that in two-layer neural networks, when the dimension, sample size and hidden layer size are proportional, one gradient step with a constant step size on the first layer weights can lead to feature learning. However, non-linear components of a single-index target function are still not learned. They further show that with a sufficiently large step size, [for teacher functions with information exponent \(leap index\)  \$\kappa = 1\$](#) , and under certain conditions, the updated neural networks can outperform linear and kernel methods. However, the precise effects of large gradient step sizes on learning nonlinear features, and their precise effects on the loss remain unexplored. [Dandi et al. \(2023\) show that for single index models with information exponent  \$\kappa\$ , there are hard directions whose learning requires a sample size of order  \$\Theta\(d^\kappa\)\$ .](#) They also show that with one gradient step, and a sample size  $\Theta(d)$ , only a single direction of a multi-index target function can be learned. In the present work, we study the problem of learning nonlinear components of a single-index target function with  $\kappa = 1$ .

**High-dimensional asymptotics.** We use tools developed in work on high-dimensional asymptotics, which dates back at least to the 1960s (Raudys, 1967; Deev, 1970; Raudys, 1972). Recently, these tools have been used in a wide range of areas such as wireless communications (e.g., Tulino & Verdú (2004); Couillet & Debbah (2011), etc.), high-dimensional statistics (e.g., Raudys & Young (2004); Serdobolskii (2007); Paul & Aue (2014); Yao et al. (2015); Dobriban & Wager (2018), etc.), and machine learning (e.g., Györfgyi & Tishby (1990); Opper (1995); Opper & Kinzel (1996); Couillet & Liao (2022); Engel & Van den Broeck (2001), etc.). In particular, the spectrum of so-called information plus noise random matrices that arise in Gaussian equivalence results has been studied in Dozier & Silverstein (2007); Pécché (2019) and its spikes in Capitaine (2014).

## 2 PRELIMINARIES

**Notation.** We let  $\mathbb{N} = \{1, 2, \dots\}$  be the set of positive integers. For a positive integer  $d \geq 1$ , we denote  $[d] = \{1, \dots, d\}$ . We use  $O(\cdot)$  and  $o(\cdot)$  for the standard big-O and little-o notation. For a matrix  $\mathbf{A}$  and a non-negative integer  $k$ ,  $\mathbf{A}^{\circ k} = \mathbf{A} \circ \mathbf{A} \circ \dots \circ \mathbf{A}$  is the matrix of the  $k$ -th powers of the elements of  $\mathbf{A}$ . For positive sequences  $(A_n)_{n \geq 1}, (B_n)_{n \geq 1}$ , we write  $A_n = \Theta(B_n)$  or  $A_n \asymp B_n$  or  $A_n \equiv B_n$  if there is  $C, C' > 0$  such that  $CB_n \geq A_n \geq C'B_n$  for all  $n$ . We use  $O_{\mathbb{P}}(\cdot), o_{\mathbb{P}}(\cdot)$ , and  $\Theta_{\mathbb{P}}(\cdot)$  for the same notions holding in probability. The symbol  $\rightarrow_P$  denotes convergence in probability.

### 2.1 PROBLEM SETTING

In this paper, we study a supervised learning problem with training data  $(\mathbf{x}_i, y_i) \in \mathbb{R}^d \times \mathbb{R}$ , for  $i \in [2n]$ , where  $d$  is the feature dimension and  $n \geq 2$  is the sample size. We assume that the data is generated according to

$$\mathbf{x}_i \stackrel{\text{i.i.d.}}{\sim} \mathbf{N}(0, \mathbf{I}_d), \text{ and } y_i = f_{\star}(\mathbf{x}_i) + \varepsilon_i, \quad (1)$$

in which  $f_*$  is the ground truth or *teacher function*, and  $\varepsilon_i \stackrel{\text{i.i.d.}}{\sim} \mathcal{N}(0, \sigma_\varepsilon^2)$  is additive noise.

We fit a model to the data in order to predict outcomes for unlabeled examples at test time; using a two-layer neural network. We let the width of the internal layer be  $N \in \mathbb{N}$ . For a weight matrix  $\mathbf{W} \in \mathbb{R}^{N \times d}$ , an activation function  $\sigma : \mathbb{R} \rightarrow \mathbb{R}$  applied element-wise, and the weights  $\mathbf{a} \in \mathbb{R}^N$  of a linear layer, we define the two-layer  $\sigma$  neural network as  $f_{\mathbf{W}, \mathbf{a}}(\mathbf{x}) = \mathbf{a}^\top \sigma(\mathbf{W}\mathbf{x})$ .

Following Ba et al. (2022), for the convenience of the theoretical analysis, we split the training data into two parts:  $\mathbf{X} = [\mathbf{x}_1, \dots, \mathbf{x}_n]^\top \in \mathbb{R}^{n \times d}$ ,  $\mathbf{y} = (y_1, \dots, y_n)^\top \in \mathbb{R}^n$  and  $\tilde{\mathbf{X}} = [\mathbf{x}_{n+1}, \dots, \mathbf{x}_{2n}]^\top \in \mathbb{R}^{n \times d}$ ,  $\tilde{\mathbf{y}} = (y_{n+1}, \dots, y_{2n})^\top \in \mathbb{R}^n$ . We train the two layer neural network as follows. First, we initialize  $\mathbf{a} = (a_1, \dots, a_N)^\top$  with  $a_i \stackrel{\text{i.i.d.}}{\sim} \mathcal{N}(0, 1/N)$  and initialize  $\mathbf{W}$  with

$$\mathbf{W}_0 = [\mathbf{w}_{0,1}, \dots, \mathbf{w}_{0,N}]^\top \in \mathbb{R}^{N \times d}, \quad \mathbf{w}_{0,i} \stackrel{\text{i.i.d.}}{\sim} \text{Unif}(\mathbb{S}^{d-1}),$$

where  $\mathbb{S}^{d-1}$  is the unit sphere in  $\mathbb{R}^d$  and  $\text{Unif}(\mathbb{S}^{d-1})$  is the uniform measure over it. **Although we choose this initialization for a simpler analysis, many arguments can be shown to hold if we switch from the uniform distribution over the sphere to a Gaussian. For example, see Section N.5.** Fixing  $\mathbf{a}$  at initialization, we perform *one step of gradient descent* on  $\mathbf{W}$  with respect to the squared loss computed on  $(\mathbf{X}, \mathbf{y})$ . Recalling that  $\circ$  denotes element-wise multiplication, the negative gradient can be written as

$$\mathbf{G} := -\frac{\partial}{\partial \mathbf{W}} \left[ \frac{1}{2n} \|\mathbf{y} - \sigma(\mathbf{X}\mathbf{W}^\top)\mathbf{a}\|_2^2 \right]_{\mathbf{W}=\mathbf{W}_0} = \frac{1}{n} [(\mathbf{a}\mathbf{y}^\top - \mathbf{a}\mathbf{a}^\top \sigma(\mathbf{W}_0\mathbf{X}^\top)) \circ \sigma'(\mathbf{W}_0\mathbf{X}^\top)] \mathbf{X},$$

and the one-step update is  $\mathbf{W} = [\mathbf{w}_1, \dots, \mathbf{w}_N]^\top = \mathbf{W}_0 + \eta \mathbf{G}$  for a *learning rate* or *step size*  $\eta$ .

After the update on  $\mathbf{W}$ , we perform ridge regression on  $\mathbf{a}$  using  $(\tilde{\mathbf{X}}, \tilde{\mathbf{y}})$ . Let  $\mathbf{F} = \sigma(\tilde{\mathbf{X}}\mathbf{W}^\top) \in \mathbb{R}^{n \times N}$  be the feature matrix after the one-step update. For a regularization parameter  $\lambda > 0$ , we set

$$\hat{\mathbf{a}} = \hat{\mathbf{a}}(\mathbf{F}) = \arg \min_{\mathbf{a} \in \mathbb{R}^N} \frac{1}{n} \|\tilde{\mathbf{y}} - \mathbf{F}\mathbf{a}\|_2^2 + \lambda \|\mathbf{a}\|_2^2 = (\mathbf{F}^\top \mathbf{F} + \lambda n \mathbf{I}_N)^{-1} \mathbf{F}^\top \tilde{\mathbf{y}}. \quad (2)$$

Then, for a test datapoint with features  $\mathbf{x}$ , we predict the outcome  $\hat{y} = f_{\mathbf{W}, \hat{\mathbf{a}}}(\mathbf{x}) = \hat{\mathbf{a}}^\top \sigma(\mathbf{W}\mathbf{x})$ .

## 2.2 CONDITIONS

Our theoretical analysis applies under the following conditions:

**Condition 2.1** (Asymptotic setting). *We assume that the sample size  $n$ , dimension  $d$ , and width of hidden layer  $N$  all tend to infinity with*

$$d/n \rightarrow \phi > 0, \quad \text{and} \quad d/N \rightarrow \psi > 0.$$

We require the following conditions on the teacher function  $f_*$ .

**Condition 2.2.** *We let  $f_* : \mathbb{R}^d \rightarrow \mathbb{R}$  be a single-neuron model  $f_*(\mathbf{x}) = \sigma_*(\mathbf{x}^\top \boldsymbol{\beta}_*)$ , where  $\boldsymbol{\beta}_* \in \mathbb{R}^d$  is an unknown parameter with  $\boldsymbol{\beta}_* \sim \mathcal{N}(0, \frac{1}{d} \mathbf{I}_d)$  and  $\sigma_* : \mathbb{R} \rightarrow \mathbb{R}$  is a teacher activation function. We further assume that  $\sigma_* : \mathbb{R} \rightarrow \mathbb{R}$  is  $\Theta(1)$ -Lipschitz.*

We let  $H_k$ ,  $k \geq 1$  be the (probabilist's) Hermite polynomials on  $\mathbb{R}$  defined by

$$H_k(x) = (-1)^k \exp(x^2/2) \frac{d^k}{dx^k} \exp(-x^2/2),$$

for any  $x \in \mathbb{R}$ . These polynomials form an orthogonal basis in the Hilbert space  $L^2$  of measurable functions  $f : \mathbb{R} \rightarrow \mathbb{R}$  such that  $\int f^2(x) \exp(-x^2/2) dx < \infty$  with inner product  $\langle f, g \rangle = \int f(x)g(x) \exp(-x^2/2) dx$ . The first few Hermite polynomials are  $H_0(x) = 1$ ,  $H_1(x) = x$ , and  $H_2(x) = x^2 - 1$ .

**Condition 2.3.** *The activation function  $\sigma : \mathbb{R} \rightarrow \mathbb{R}$  has the following Hermite expansion in  $L^2$ :*

$$\sigma(z) = \sum_{k=1}^{\infty} c_k H_k(z), \quad c_k = \frac{1}{k!} \mathbb{E}_{Z \sim \mathcal{N}(0,1)} [\sigma(Z) H_k(Z)].$$

*The coefficients satisfy  $c_1 \neq 0$  and  $c_k^2 k! \leq C k^{-\frac{3}{2}-\omega}$  for some  $C, \omega > 0$  and for all  $k \geq 1$ . Moreover, the first three derivatives of  $\sigma$  almost surely exist and are bounded.*

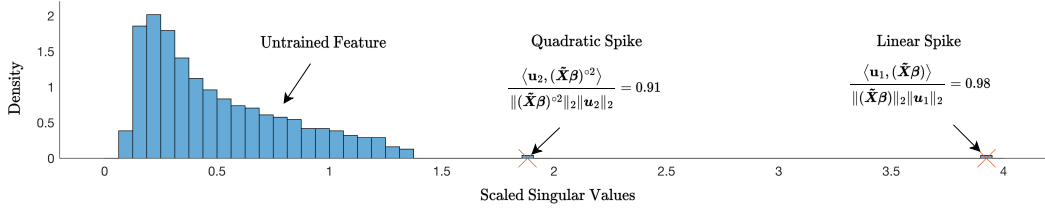

Figure 2: Histogram of the scaled singular values (divided by  $\sqrt{n}$ ) of the feature matrix after the update with step size  $\eta = n^{0.29}$  ( $\ell = 2$ ). In this regime, two isolated spikes appear in the spectrum as stated in Theorem 3.3. The top two left singular vectors  $\mathbf{u}_1$  and  $\mathbf{u}_2$  are aligned with  $\tilde{\mathbf{X}}\boldsymbol{\beta}$  and  $(\tilde{\mathbf{X}}\boldsymbol{\beta})^{\circ 2}$ , respectively. See Section 5 for the simulation details.

We remark that the above condition requires  $c_0 = 0$ , i.e., that  $\mathbb{E}\sigma(Z) = 0$  for  $Z \sim \mathcal{N}(0, 1)$ . This condition is in line with prior work in the area (e.g., Adlam & Pennington (2020a); Ba et al. (2022), etc.), and could be removed at the expense of more complicated formulas and theoretical analysis. The smoothness assumption on  $\sigma$  is also in line with prior work in the area (see e.g., Hu & Lu (2023); Ba et al. (2022), etc.). **Note that the above condition is satisfied by many popular activation functions (after shifting) such as the ReLU  $\sigma(x) = \max\{x, 0\} - \frac{1}{\sqrt{2\pi}}$ , hyperbolic tangent  $\sigma(x) = \frac{e^x - e^{-x}}{e^x + e^{-x}}$ , and sigmoid  $\sigma(x) = \frac{1}{1 + e^{-x}} - \frac{1}{2}$ .** We also make similar assumptions on the teacher activation:

**Condition 2.4.** *The teacher activation  $\sigma_* : \mathbb{R} \rightarrow \mathbb{R}$  has the following Hermite expansion in  $L^2$ :*

$$\sigma_*(z) = \sum_{k=1}^{\infty} c_{*,k} H_k(z), \quad c_{*,k} = \frac{1}{k!} \mathbb{E}_{Z \sim \mathcal{N}(0,1)} [\sigma_*(Z) H_k(Z)].$$

Also, we define  $c_* = (\sum_{k=1}^{\infty} k! c_{*,k}^2)^{\frac{1}{2}}$ .

### 3 ANALYSIS OF THE FEATURE MATRIX

The first step in analyzing the spectrum of the feature matrix  $\mathbf{F}$  is to study the negative gradient  $\mathbf{G}$ . It is shown in (Ba et al., 2022, Proposition 2) that in operator norm, the matrix  $\mathbf{G}$  can be approximated by the rank-one matrix  $c_1 \mathbf{a} \boldsymbol{\beta}^\top$  with high probability, where the Hermite coefficient  $c_1$  of the activation  $\sigma$  is defined in Condition 2.3, and  $\boldsymbol{\beta} = \frac{1}{n} \mathbf{X}^\top \mathbf{y} \in \mathbb{R}^d$ . As the following proposition suggests,  $\boldsymbol{\beta}$  can be understood as a noisy estimate of  $\boldsymbol{\beta}_*$  (see also Lemma K.1).

**Proposition 3.1.** *If Conditions 2.1-2.4 hold, then*

$$\frac{|\boldsymbol{\beta}_*^\top \boldsymbol{\beta}|}{\|\boldsymbol{\beta}_*\|_2 \|\boldsymbol{\beta}\|_2} \xrightarrow{P} \frac{|c_{*,1}|}{\sqrt{c_{*,1}^2 + \phi(c_*^2 + \sigma_\varepsilon^2)}}.$$

In particular, if the number of samples used for the gradient update is very large; i.e.,  $\phi \rightarrow 0$ ,  $\boldsymbol{\beta}$  will converge to being completely aligned to  $\boldsymbol{\beta}_*$ .

Building on this result, we can prove the following rank-one approximation lemma. Note that the updated feature matrix can be written as  $\mathbf{F} = \sigma(\tilde{\mathbf{X}}(\mathbf{W}_0 + \eta \mathbf{G})^\top)$  and terms of the form  $(\tilde{\mathbf{X}} \mathbf{G}^\top)^{\circ k}$ ,  $k \in \mathbb{N}$ , will appear in polynomial and Taylor expansions of  $\mathbf{F}$  around  $\mathbf{F}_0$ . In the following lemma, we show that for any fixed power  $k$ , these terms can be approximated by rank one terms.

**Lemma 3.2** (Rank-one approximation). *If Conditions 2.1-2.4 hold, then there exists  $C > 0$  such that for  $c_1$  from Condition 2.3, for any fixed  $k \in \mathbb{N}$ ,*

$$\|(\tilde{\mathbf{X}} \mathbf{G}^\top)^{\circ k} - c_1^k (\tilde{\mathbf{X}} \boldsymbol{\beta})^{\circ k} (\mathbf{a}^{\circ k})^\top\|_{\text{op}} \leq C^k n^{-\frac{k}{2}} \log^{2k} n$$

with probability  $1 - o(1)$ .

Next, we will show that after the gradient step, the spectrum of the feature matrix  $\mathbf{F}$  will consist of a bulk of singular values that stick close together—given by the spectrum of the initial feature

matrix  $\mathbf{F}_0 = \sigma(\tilde{\mathbf{X}}\mathbf{W}_0^\top)$ —and  $\ell$  separated spikes<sup>1</sup>, where  $\ell$  is an integer that depends on the step size used in the gradient update. Specifically, when the step size is  $\eta \asymp n^\alpha$  with  $\frac{\ell-1}{2\ell} < \alpha < \frac{\ell}{2\ell+2}$  for some  $\ell \in \mathbb{N}$ , the feature matrix  $\mathbf{F}$  can be approximated in operator norm by the untrained features  $\mathbf{F}_0 = \sigma(\tilde{\mathbf{X}}\mathbf{W}_0^\top)$  plus  $\ell$  rank-one terms, where the left singular vectors of the rank-one terms are aligned with the non-linear features  $\tilde{\mathbf{X}} \mapsto (\tilde{\mathbf{X}}\boldsymbol{\beta})^{\circ k}$ , for  $k \in [\ell]$ . See Figure 2.

**Theorem 3.3** (Spectrum of feature matrix). *Let  $\eta \asymp n^\alpha$  with  $\frac{\ell-1}{2\ell} < \alpha < \frac{\ell}{2\ell+2}$  for some  $\ell \in \mathbb{N}$ . If Conditions 2.1-2.4 hold, then for  $c_k$  from Condition 2.3 and  $\mathbf{F}_0 = \sigma(\tilde{\mathbf{X}}\mathbf{W}_0^\top)$ ,*

$$\mathbf{F} = \mathbf{F}_\ell + \boldsymbol{\Delta}, \quad \text{with} \quad \mathbf{F}_\ell := \mathbf{F}_0 + \sum_{k=1}^{\ell} c_1^k c_k \eta^k (\tilde{\mathbf{X}}\boldsymbol{\beta})^{\circ k} (\mathbf{a}^{\circ k})^\top, \quad (3)$$

where  $\|\boldsymbol{\Delta}\|_{\text{op}} = o(\sqrt{n})$  with probability  $1 - o(1)$ .

To understand  $(\tilde{\mathbf{X}}\boldsymbol{\beta})^{\circ k} (\mathbf{a}^{\circ k})^\top$ , notice that for a datapoint with features  $\tilde{x}_i$ , the activation of each neuron is proportional to the polynomial feature  $(\tilde{x}_i^\top \boldsymbol{\beta})^k$ , with coefficients given by  $\mathbf{a}^{\circ k}$  for the neurons. The spectrum of the initial feature matrix  $\mathbf{F}_0$  is fully characterized in [Pennington & Worah \(2017\)](#); [Benigni & Péché \(2021; 2022\)](#); [Louart et al. \(2018\)](#); [Fan & Wang \(2020\)](#), and its operator norm is known to be  $\Theta_{\mathbb{P}}(\sqrt{n})$ . Moreover, it follows from the proof that the operator norm of each of the terms  $c_1^k c_k \eta^k (\tilde{\mathbf{X}}\boldsymbol{\beta})^{\circ k} (\mathbf{a}^{\circ k})^\top$ ,  $k \in [\ell]$  is with high probability of order larger than  $\sqrt{n}$ . Thus, Theorem 3.3 identifies the spikes in the spectrum of the feature matrix.

**Proof Idea.** We approximate the feature matrix  $\mathbf{F} = \sigma(\tilde{\mathbf{X}}(\mathbf{W}_0 + \eta\mathbf{G})^\top)$  by a polynomial using its Hermite expansion. Next, we use the binomial expansion and apply Lemma 3.2 to approximate  $(\tilde{\mathbf{X}}\mathbf{G}^\top)^{\circ k}$  by  $c_1^k (\tilde{\mathbf{X}}\boldsymbol{\beta})^{\circ k} (\mathbf{a}^{\circ k})^\top$ , for all  $k$ . Then, spike terms with  $k \geq \ell + 1$  are negligible since we can show that their norm is  $O_{\mathbb{P}}(n^{k\alpha + \frac{1}{2} - \frac{k-1}{2}}) = o_{\mathbb{P}}(\sqrt{n})$ .

The special case where  $\alpha = 0$  is discussed in (Ba et al., 2022, Section 3), which focuses on the spectrum of the updated weight matrix  $\mathbf{W} = \mathbf{W}_0 + \eta\mathbf{G}$ . However, here we study the updated feature matrix  $\mathbf{F} = \sigma(\tilde{\mathbf{X}}(\mathbf{W}_0 + \eta\mathbf{G})^\top)$  because that is more directly related to the learning problem—as we will discuss in the consequences for the training and test risk below.

In the following theorem, we argue that the subspace spanned by the non-linear features  $\{\sigma(\tilde{\mathbf{X}}\mathbf{w}_i)\}_{i \in [N]}$  can be approximated by the subspace spanned by the monomials  $\{(\tilde{\mathbf{X}}\boldsymbol{\beta})^{\circ k}\}_{k \in [\ell]}$ . For two  $\ell$ -dimensional subspaces  $\mathcal{U}_1, \mathcal{U}_2 \subseteq \mathbb{R}^n$ , with orthonormal bases  $\mathbf{U}_1, \mathbf{U}_2 \in \mathbb{R}^{n \times \ell}$ , recall the principal angle distance between  $\mathcal{U}_1, \mathcal{U}_2$  defined by  $d(\mathcal{U}_1, \mathcal{U}_2) = \min_{\mathbf{Q}} \|\mathbf{U}_1 - \mathbf{U}_2\mathbf{Q}\|_{\text{op}}$ , where the minimum is over  $\ell \times \ell$  orthogonal matrices (Stewart & Sun, 1990). This definition is invariant to the choice of the orthonormal bases  $\mathbf{U}_1, \mathbf{U}_2$ .

**Theorem 3.4.** *Let  $\mathcal{F}_\ell$  be the  $\ell$ -dimensional subspace of  $\mathbb{R}^n$  spanned by top- $\ell$  left singular vectors (principal components) of  $\mathbf{F}$ . Under the conditions of Theorem 3.3, we have*

$$d(\mathcal{F}_\ell, \text{span}\{(\tilde{\mathbf{X}}\boldsymbol{\beta})^{\circ k}\}_{k \in [\ell]}) \rightarrow_P 0.$$

This result shows that after one step of gradient descent with step size  $\eta \asymp n^\alpha$  with  $\frac{\ell-1}{2\ell} < \alpha < \frac{\ell}{2\ell+2}$ , the subspace of the top- $\ell$  left singular vectors carries information from the polynomials  $\{(\tilde{\mathbf{X}}\boldsymbol{\beta})^{\circ k}\}_{k \in [\ell]}$ . Also, recall that by Proposition 3.1, the vector  $\boldsymbol{\beta}$  is aligned with  $\boldsymbol{\beta}_*$ . Hence, it is shown that  $\mathcal{F}_\ell$  carries information from the first  $\ell$  polynomial components of the teacher function.

**Proof Idea.** We use Wedin’s theorem (Wedin, 1972) to characterize the distance between the left singular vector space of  $\sum_{k=1}^{\ell} c_1^k c_k \eta^k (\tilde{\mathbf{X}}\boldsymbol{\beta})^{\circ k} (\mathbf{a}^{\circ k})^\top$  and that of  $\mathbf{F}$ . Here, we consider the matrix  $\mathbf{F}_0 + \boldsymbol{\Delta}$  as the perturbation term.

## 4 LEARNING HIGHER-DEGREE POLYNOMIALS

In the previous section, we studied the feature matrix  $\mathbf{F}$  and showed that when  $\eta \asymp n^\alpha$  with  $\frac{\ell-1}{2\ell} < \alpha < \frac{\ell}{2\ell+2}$ , it can be approximated by  $\mathbf{F}_0 = \sigma(\tilde{\mathbf{X}}\mathbf{W}_0^\top)$  plus  $\ell$  rank-one or spike terms. We

<sup>1</sup>Using terminology from random matrix theory (Bai & Silverstein, 2010; Yao et al., 2015).

also saw that the left singular vectors of the spike terms are aligned with the non-linear functions  $\tilde{\mathbf{X}} \mapsto (\tilde{\mathbf{X}}\boldsymbol{\beta})^{\circ k}$ . Intuitively, this result suggests that after the gradient update, the trained weights are becoming aligned with the teacher model and we should expect the ridge regression estimator on the learned features to achieve better performance. In particular, when  $\alpha > 0$ , we expect the ridge regression estimator to—partially—capture the non-linear part of the teacher function. This is impossible for  $\eta = O(1)$  (Ba et al., 2022) or  $\eta = 0$  (Hu & Lu, 2023; Mei & Montanari, 2022).

In this section, we aim to make this intuition rigorous and show that the spikes in the feature matrix lead to a decrease in the loss achieved by the estimator. Moreover, for large enough step sizes, the model can fit non-linear components of the teacher function. For this, we first need to prove *equivalence theorems* showing that instead of the true feature matrix  $\mathbf{F}$ , the approximations from Theorem 3.3 can be used to compute error terms (i.e., the effect of  $\Delta$  on the error is negligible).

#### 4.1 EQUIVALENCE THEOREMS

Given a regularization parameter  $\lambda > 0$ , recalling the ridge estimator  $\hat{\mathbf{a}}(\mathbf{F})$  from equation 2, we define the training loss

$$\mathcal{L}_{\text{tr}}(\mathbf{F}) = \frac{1}{n} \|\tilde{\mathbf{y}} - \mathbf{F}\hat{\mathbf{a}}(\mathbf{F})\|_2^2 + \lambda \|\hat{\mathbf{a}}(\mathbf{F})\|_2^2.$$

In the next theorem, we show that when  $\eta \asymp n^\alpha$  with  $\frac{\ell-1}{2\ell} < \alpha < \frac{\ell}{2\ell+2}$ , the training loss  $\mathcal{L}_{\text{tr}}(\mathbf{F})$  can be approximated with negligible error by  $\mathcal{L}_{\text{tr}}(\mathbf{F}_\ell)$ .

In other words, the approximation of the feature matrix in Theorem 3.3 can be used to derive the asymptotics of the training loss.

**Theorem 4.1** (Training loss equivalence). *Let  $\eta \asymp n^\alpha$  with  $\frac{\ell-1}{2\ell} < \alpha < \frac{\ell}{2\ell+2}$  for some  $\ell \in \mathbb{N}$  and recall  $\mathbf{F}_\ell$  from equation 3. If Conditions 2.1-2.4 hold, then for any fixed  $\lambda > 0$ , we have  $\mathcal{L}_{\text{tr}}(\mathbf{F}) - \mathcal{L}_{\text{tr}}(\mathbf{F}_\ell) = o(1)$ , with probability  $1 - o(1)$ .*

Similar equivalence results can also be proved for the test risk, i.e., the average test loss. For any  $\mathbf{a} \in \mathbb{R}^N$ , we define the test risk of  $\mathbf{a}$  as  $\mathcal{L}_{\text{te}}(\mathbf{a}) = \mathbb{E}_{\mathbf{f}, y} (y - \mathbf{f}^\top \mathbf{a})^2$ , in which the expectation is taken over  $(\mathbf{x}, y)$  where  $\mathbf{f} = \sigma(\mathbf{W}\mathbf{x})$  with  $\mathbf{x} \sim \mathcal{N}(0, \mathbf{I}_d)$  and  $y = f_*(\mathbf{x}) + \varepsilon$  with  $\varepsilon \sim \mathcal{N}(0, \sigma_\varepsilon^2)$ . The next theorem shows that one can also use the approximation of the feature matrix from Theorem 3.3 to derive the asymptotics of the test risk.

**Theorem 4.2** (Test risk equivalence). *Let  $\eta \asymp n^\alpha$  with  $\frac{\ell-1}{2\ell} < \alpha < \frac{\ell}{2\ell+2}$  for some  $\ell \in \mathbb{N}$  and  $\mathbf{F}_\ell$  be defined as in equation 3. If Conditions 2.1-2.4 hold, then for any  $\lambda > 0$ , if  $\mathcal{L}_{\text{te}}(\hat{\mathbf{a}}(\mathbf{F})) \rightarrow_P \mathcal{L}_{\mathbf{F}}$  and  $\mathcal{L}_{\text{te}}(\hat{\mathbf{a}}(\mathbf{F}_\ell)) \rightarrow_P \mathcal{L}_{\mathbf{F}_\ell}$ , we have  $\mathcal{L}_{\mathbf{F}} = \mathcal{L}_{\mathbf{F}_\ell}$ .*

**Proof Idea.** For theorem 4.1 we argue that the error introduced by swapping the feature matrix  $\mathbf{F}$  with  $\mathbf{F}_\ell$  is small, using a *free-energy trick* (Abbasi et al., 2019; Hu & Lu, 2023; Hassani & Javanmard, 2022). We first extend Theorem 4.1 and show that for any  $\lambda, \zeta > 0$ , the minima over  $\mathbf{a}$  of

$$\mathcal{R}_\zeta(\mathbf{a}, \bar{\mathbf{F}}) = \frac{1}{n} \|\tilde{\mathbf{y}} - \bar{\mathbf{F}}\mathbf{a}\|_2^2 + \lambda \|\mathbf{a}\|_2^2 + \zeta \mathcal{L}_{\text{te}}(\mathbf{a}),$$

for  $\bar{\mathbf{F}} = \mathbf{F}$  and  $\bar{\mathbf{F}} = \mathbf{F}_\ell$  are close. Then, we use this to argue that the limiting test loss are also close.

With Theorem 4.1 and 4.2 in hand, for  $\eta \asymp n^\alpha$ , we can use the approximation  $\mathbf{F}_\ell$ —with the appropriate  $\ell$ —of the feature matrix  $\mathbf{F}$  to analyze the train loss and the test risk.

#### 4.2 ANALYSIS OF TRAINING LOSS

In this section, we quantify the discrepancy between the training loss of the ridge estimator trained on the new—learned—feature map  $\mathbf{F}$  and the same ridge estimator trained on the unlearned feature map  $\mathbf{F}_0$ . We will do this for the step size  $\eta \asymp n^\alpha$  with  $\frac{\ell-1}{2\ell} < \alpha < \frac{\ell}{2\ell+2}$  for various  $\ell \in \mathbb{N}$ .

Our results depend on the limits of traces of the matrices  $(\mathbf{F}_0\mathbf{F}_0^\top + \lambda n\mathbf{I}_n)^{-1}$  and  $\tilde{\mathbf{X}}^\top (\mathbf{F}_0\mathbf{F}_0^\top + \lambda n\mathbf{I}_n)^{-1} \tilde{\mathbf{X}}$ . These limits have been determined in Adlam et al. (2022); Adlam & Pennington (2020a),



see also Pennington & Worah (2017); Péché (2019), and depend on the values  $m_1, m_2 > 0$ , which are the unique solutions of the following system of coupled equations, for  $\lambda > 0$ :

$$\begin{cases} \phi(m_1 - m_2)(c_{>1}^2 m_1 + c_1^2 m_2) + c_1^2 m_1 m_2 \left(\lambda \frac{\psi}{\phi} m_1 - 1\right) = 0, \\ \frac{\phi}{\psi}(c_1^2 m_1 m_2 + \phi(m_2 - m_1)) + c_1^2 m_1 m_2 \left(\lambda \frac{\psi}{\phi} m_1 - 1\right) = 0, \end{cases} \quad (4)$$

where  $c_{>1} = (\sum_{k=2}^{\infty} k! c_k^2)^{1/2}$ . For instance, we leverage that  $\lim_{d,n,N \rightarrow \infty} \text{tr}(\tilde{\mathbf{X}}^\top (\mathbf{F}_0 \mathbf{F}_0^\top + \lambda n \mathbf{I}_n)^{-1} \tilde{\mathbf{X}}) / d = \psi m_2 / \phi > 0$  and  $\lim_{d,n,N \rightarrow \infty} \text{tr}((\mathbf{F}_0 \mathbf{F}_0^\top + \lambda n \mathbf{I}_n)^{-1}) = \psi m_1 / \phi > 0$ .

See Lemma K.4 and its proof for more details. For instance, as argued in Pennington & Worah (2017); Adlam et al. (2022) these can be reduced to a quartic equation for  $m_1$  and are convenient to solve numerically. However, the existence of these limits does not imply our results; on the contrary, the proofs of our results require extensive additional calculations and several novel ideas. Moreover, our results also rely on the following Gaussian equivalence conjecture for the untrained feature matrix, which is commonly used in the theory of random features models. See Section J for related work and further discussion; in particular Gaussian Equivalence has been broadly supported by prior theoretical and empirical results.

**Conjecture 4.3** (Gaussian Equivalence). *The limiting behavior of the training error is unchanged if we replace the untrained feature matrix  $\mathbf{F}_0 = \sigma(\tilde{\mathbf{X}} \mathbf{W}_0^\top)$  with  $\mathbf{F}_0 = c_1 \tilde{\mathbf{X}} \mathbf{W}_0^\top + c_{>1} \mathbf{Z}$ , where  $\mathbf{Z} \in \mathbb{R}^{n \times d}$  is an independent random matrix with i.i.d.  $\mathcal{N}(0, 1)$  entries. Specifically, the limiting behavior of the quantities listed in Section J is unchanged.*

**Theorem 4.4.** *If Conditions 2.1-2.4 are satisfied, and the Gaussian equivalence conjecture 4.3 hold, while we also have  $c_1, \dots, c_\ell \neq 0$ , and  $\eta \asymp n^\alpha$  with  $\frac{\ell-1}{2\ell} < \alpha < \frac{\ell}{2\ell+2}$ , then for the learned feature map  $\mathbf{F}$  and the untrained feature map  $\mathbf{F}_0$ , we have  $\mathcal{L}_{\text{tr}}(\mathbf{F}_0) - \mathcal{L}_{\text{tr}}(\mathbf{F}) \rightarrow_P \Delta_\ell > 0$ , where the explicit expression for  $\Delta_\ell$  can be found in Section L.*

The expression for  $\Delta_\ell$  is complex and given in Section L due to space limitations. For a better understanding of Theorem 4.4, we consider two specific cases of  $\ell = 1$  and  $\ell = 2$ .

**Corollary 4.5.** *Under the assumptions of Theorem 4.4, for  $\ell = 1$ , we have*

$$\mathcal{L}_{\text{tr}}(\mathbf{F}_0) - \mathcal{L}_{\text{tr}}(\mathbf{F}) \rightarrow_P \Delta_1 := \frac{\psi \lambda c_{*,1}^4 m_2}{\phi [c_{*,1}^2 + \phi(c_\star^2 + \sigma_\varepsilon^2)]} > 0. \quad (5)$$

Similarly, for  $\ell = 2$ , we have

$$\mathcal{L}_{\text{tr}}(\mathbf{F}_0) - \mathcal{L}_{\text{tr}}(\mathbf{F}) \rightarrow_P \Delta_2 := \Delta_1 + \frac{4\psi \lambda c_{*,1}^4 c_{*,2}^2 m_1}{3\phi [\phi(c_\star^2 + \sigma_\varepsilon^2) + c_{*,1}^2]} > 0. \quad (6)$$

The above result confirms our intuition that training the first-layer parameters improves the performance of the trained model. For example, when  $\ell = 1$ , the improvement in the loss is increasing in the strength of the linear component  $c_{*,1}$  keeping the signal strength  $c_\star$  fixed; and not so for the strength of the non-linear component  $c_{*,>1}^2 = c_\star^2 - c_{*,1}^2$ . When we further increase the step size to the  $\ell = 2$  regime, the loss of the trained model will drop by an additional positive value, depending on the strength  $c_{*,2}$  of the quadratic signal, which supports our claim that the quadratic component of the target function is also being learned.

Given  $\ell \in \mathbb{N}$ , the loss of the trained model is asymptotically constant for all  $\eta = cn^\alpha$  with  $\frac{\ell-1}{2\ell} < \alpha < \frac{\ell}{2\ell+2}$  and  $c \in \mathbb{R}$ . There are sharp jumps at the edges between regimes of  $\alpha$ , whose size is precisely characterized above. See Figure 3 (Right).

**Proof Idea.** We first show that  $\mathcal{L}_{\text{tr}}(\mathbf{F}) = \lambda \tilde{\mathbf{y}}^\top (\mathbf{F} \mathbf{F}^\top + \lambda n \mathbf{I}_n)^{-1} \tilde{\mathbf{y}}$ . Then using Theorem 4.1 and by application of the Woodbury formula, we decompose the matrix  $\bar{\mathbf{R}} = (\mathbf{F} \mathbf{F}^\top + \lambda n \mathbf{I}_n)^{-1}$  as  $\bar{\mathbf{R}}_0 = (\mathbf{F}_0 \mathbf{F}_0^\top + \lambda n \mathbf{I}_n)^{-1}$  plus rank-one terms involving  $\bar{\mathbf{R}}_0$  and the non-linear spikes from Theorem 3.3. Then, we show that the interactions between the first  $\ell$  components of  $\tilde{\mathbf{y}}$  and the terms involving the non-linear spikes in the expansion of  $\bar{\mathbf{R}}$  will result in non-vanishing terms corresponding to learning different components of the target function  $f_\star$ .



## 5 NUMERICAL SIMULATIONS

To support and illustrate our theoretical results, we present some numerical simulations. We use the shifted ReLU activation  $\sigma(x) = \max(x, 0) - 1/\sqrt{2\pi}$ ,  $n = 1000$ ,  $N = 500$ ,  $d = 300$ , and the regularization parameter  $\lambda = 0.01$ .

**Singular Value Spectrum of  $\mathbf{F}$ .** We let the teacher function  $f_*(\mathbf{x}) = H_1(\beta_*^\top \mathbf{x}) + H_2(\beta_*^\top \mathbf{x})$  be, set the noise variance  $\sigma_\varepsilon^2 = 0.5$ , and the step size to  $\eta = n^{0.29}$ , so  $\ell = 2$ . We plot the histogram of singular values of the updated feature matrix  $\mathbf{F}$ . In Figure 2, we see two spikes corresponding to  $\tilde{\mathbf{X}}\beta$ ,  $(\tilde{\mathbf{X}}\beta)^{\circ 2}$  as suggested by Theorem 3.3 and 3.4. Since  $f_*$  has a linear component  $H_1$  and a quadratic component  $H_2$ , these spikes will lead to feature learning.

**Quadratic Feature Learning.** To support the findings of Corollary 4.5 for  $\ell = 2$ , we consider the following two settings:

$$\textbf{Setting 1} : y = H_1(\beta_*^\top \mathbf{x}) + \varepsilon, \quad \varepsilon \sim \mathcal{N}(0, 1), \quad \textbf{Setting 2} : y = H_1(\beta_*^\top \mathbf{x}) + \frac{1}{\sqrt{2}}H_2(\beta_*^\top \mathbf{x}).$$

Note that  $c_{*,1}$  and  $c_* + \sigma_\varepsilon^2$  are same in these two settings. This ensures that the improvement due to learning the linear component is the same. We plot the training and test errors of the two-layer neural networks trained with the procedure described in Section 2.1 as functions of  $\log(\eta)/\log(n)$ . In Figure 3 (Left), we see that the errors decrease in the range  $\log(\eta)/\log(n) \in (0, \frac{1}{4})$  as the model learns the linear component  $H_1(\beta_*^\top \mathbf{x})$ . In the range  $\log(\eta)/\log(n) \in (\frac{1}{4}, \frac{1}{3})$ , the model starts to learn the quadratic feature. However since the quadratic feature is not present in Setting 1, the errors under the two settings diverge. These results are consistent with Corollary 4.5.

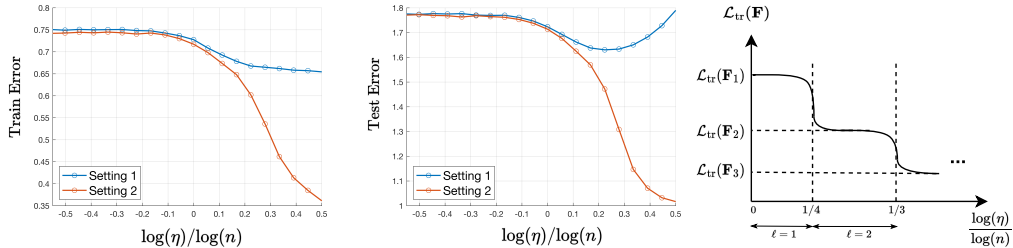

Figure 3: (Left, Middle) Training and test errors after one gradient as functions of  $\log(\eta)/\log(n)$ . (Right) Theoretical training error curve as a function of  $\log(\eta)/\log(n)$ .

## 6 CONCLUSION

In this work, we study feature learning in two-layer neural networks under one-step gradient descent with the step size  $\eta \asymp n^\alpha$ ,  $\alpha \in (0, \frac{1}{2})$ . We show that the singular value spectrum of the updated feature matrix exhibits different behaviors for different ranges of  $\alpha$ . Specifically, if  $\alpha \in (\frac{\ell-1}{2\ell}, \frac{\ell}{2\ell+2})$ , then the gradient update will add  $\ell$  separated singular values to the initial feature matrix spectrum. We then derive the improvement in the loss in the proportional limit and show that non-linear features can be learned in certain examples.

**Limitations and Future Work.** First, our analysis requires that the teacher activation function  $\sigma_*$  has information exponent  $\kappa = 1$ . This assumption is necessary to learn  $\beta_*$  with one step of gradient and with the sample size  $n \asymp d$ . We believe that learning  $\beta_*$  from a teacher activation with higher information exponent will require either multiple steps of gradient or a larger sample size. Second, we only derived the limiting training loss in our result. This is mainly because the test error does not allow a simple expression such as Lemma K.2, and deriving its asymptotics would require much more laborious calculation. We hope to address this issue in future work. Third, we only study the problem when  $\eta \asymp n^\alpha$  with  $\alpha \in (\frac{\ell-1}{2\ell}, \frac{\ell}{2\ell+2})$ . The case where  $\eta \asymp n^{\frac{\ell-1}{2\ell}}$  is an interesting problem and is left as future work. Finally, our results in Section 4.2 rely on a Gaussian equivalence conjecture for the untrained features  $\mathbf{F}_0$ . The Gaussian equivalence conjecture we use, despite being related to the results discussed in Section J, does not directly follow from prior work.

## REFERENCES

- Ehsan Abbasi, Fariborz Salehi, and Babak Hassibi. Universality in learning from linear measurements. In *Advances in Neural Information Processing Systems*, 2019.
- Milton Abramowitz and Irene A Stegun. *Handbook of mathematical functions with formulas, graphs, and mathematical tables*, volume 55. US Government printing office, 1968.
- Ben Adlam and Jeffrey Pennington. The neural tangent kernel in high dimensions: Triple descent and a multi-scale theory of generalization. In *International Conference on Machine Learning*, 2020a.
- Ben Adlam and Jeffrey Pennington. Understanding double descent requires a fine-grained bias-variance decomposition. In *Advances in Neural Information Processing Systems*, 2020b.
- Ben Adlam, Jake A Levinson, and Jeffrey Pennington. A random matrix perspective on mixtures of nonlinearities in high dimensions. In *International Conference on Artificial Intelligence and Statistics*, 2022.
- Jimmy Ba, Murat A Erdogdu, Taiji Suzuki, Zhichao Wang, Denny Wu, and Greg Yang. High-dimensional asymptotics of feature learning: How one gradient step improves the representation. In *Advances in Neural Information Processing Systems*, 2022.
- Zhidong Bai and Jack W Silverstein. *Spectral Analysis of Large Dimensional Random Matrices*, volume 20. Springer, 2010.
- Marwa Banna, Florence Merlevède, and Magda Peligrad. On the limiting spectral distribution for a large class of symmetric random matrices with correlated entries. *Stochastic Processes and their Applications*, 125(7):2700–2726, 2015.
- Marwa Banna, Jamal Najim, and Jianfeng Yao. A CLT for linear spectral statistics of large random information-plus-noise matrices. *Stochastic Processes and their Applications*, 130(4):2250–2281, 2020.
- Yoshua Bengio, Aaron Courville, and Pascal Vincent. Representation learning: A review and new perspectives. *IEEE Transactions on Pattern Analysis and Machine Intelligence*, 35(8):1798–1828, 2013.
- Lucas Benigni and Sandrine Péché. Eigenvalue distribution of some nonlinear models of random matrices. *Electronic Journal of Probability*, 26:1–37, 2021.
- Lucas Benigni and Sandrine Péché. Largest eigenvalues of the conjugate kernel of single-layered neural networks. *arXiv preprint arXiv:2201.04753*, 2022.
- Simone Bombari and Marco Mondelli. Stability, generalization and privacy: Precise analysis for random and NTK features. *arXiv preprint arXiv:2305.12100*, 2023.
- Simone Bombari, Shayan Kiyani, and Marco Mondelli. Beyond the universal law of robustness: Sharper laws for random features and neural tangent kernels. In *International Conference on Machine Learning*, 2023.
- David Bosch, Ashkan Panahi, and Babak Hassibi. Precise asymptotic analysis of deep random feature models. In *Conference on Learning Theory*, 2023.
- Mireille Capitaine. Exact separation phenomenon for the eigenvalues of large information-plus-noise type matrices, and an application to spiked models. *Indiana University Mathematics Journal*, pp. 1875–1910, 2014.
- Sitan Chen, Aravind Gollakota, Adam Klivans, and Raghu Meka. Hardness of noise-free learning for two-hidden-layer neural networks. In *Advances in Neural Information Processing Systems*, volume 35, pp. 10709–10724, 2022.
- Yuxin Chen, Yuejie Chi, Jianqing Fan, and Cong Ma. Spectral methods for data science: A statistical perspective. *Foundations and Trends® in Machine Learning*, 14(5):566–806, 2021.

- Xiuyuan Cheng and Amit Singer. The spectrum of random inner-product kernel matrices. *Random Matrices: Theory and Applications*, 2(04):1350010, 2013.
- Lucas Clarté, Bruno Loureiro, Florent Krzakala, and Lenka Zdeborová. On double-descent in uncertainty quantification in overparametrized models. In *International Conference on Artificial Intelligence and Statistics*, 2023.
- Romain Couillet and Merouane Debbah. *Random Matrix Methods for Wireless Communications*. Cambridge University Press, 2011.
- Romain Couillet and Zhenyu Liao. *Random Matrix Methods for Machine Learning*. Cambridge University Press, 2022.
- Hugo Cui, Florent Krzakala, and Lenka Zdeborová. Bayes-optimal learning of deep random networks of extensive-width. In *International Conference on Machine Learning*, 2023.
- Alex Damian, Jason Lee, and Mahdi Soltanolkotabi. Neural networks can learn representations with gradient descent. In *Conference on Learning Theory*, 2022.
- Yatin Dandi, Florent Krzakala, Bruno Loureiro, Luca Pesce, and Ludovic Stephan. Learning two-layer neural networks, one (giant) step at a time. *arXiv preprint arXiv:2305.18270*, 2023.
- Stéphane d’Ascoli, Marylou Gabrié, Levent Sagun, and Giulio Biroli. On the interplay between data structure and loss function in classification problems. In *Advances in Neural Information Processing Systems*, 2021.
- AD Deev. Representation of statistics of discriminant analysis and asymptotic expansion when space dimensions are comparable with sample size. In *Sov. Math. Dokl.*, volume 11, pp. 1547–1550, 1970.
- Edgar Dobriban and Stefan Wager. High-dimensional asymptotics of prediction: Ridge regression and classification. *The Annals of Statistics*, 46(1):247–279, 2018.
- Jeff Donahue, Philipp Krähenbühl, and Trevor Darrell. Adversarial feature learning. In *International Conference on Learning Representations*, 2016.
- R Brent Dozier and Jack W Silverstein. On the empirical distribution of eigenvalues of large dimensional information-plus-noise-type matrices. *Journal of Multivariate Analysis*, 98(4):678–694, 2007.
- Simon S Du, Xiyu Zhai, Barnabas Poczos, and Aarti Singh. Gradient descent provably optimizes over-parameterized neural networks. In *International Conference on Learning Representations*, 2019.
- Freeman J Dyson. A Brownian-motion model for the eigenvalues of a random matrix. *Journal of Mathematical Physics*, 3(6):1191–1198, 1962.
- Noureddine El Karoui. The spectrum of kernel random matrices. *The Annals of Statistics*, 38(1): 1–50, 2010.
- Andreas Engel and Christian Van den Broeck. *Statistical mechanics of learning*. Cambridge University Press, 2001.
- Laszlo Erdős. The matrix Dyson equation and its applications for random matrices. *arXiv preprint arXiv:1903.10060*, 2019.
- László Erdős, Sandrine Péché, José A Ramírez, Benjamin Schlein, and Horng-Tzer Yau. Bulk universality for Wigner matrices. *Communications on Pure and Applied Mathematics*, 63(7): 895–925, 2010.
- László Erdős, Horng-Tzer Yau, and Jun Yin. Bulk universality for generalized Wigner matrices. *Probability Theory and Related Fields*, 154(1):341–407, 2012.
- Zhou Fan and Andrea Montanari. The spectral norm of random inner-product kernel matrices. *Probability Theory and Related Fields*, 173(1):27–85, 2019.

- Zhou Fan and Zhichao Wang. Spectra of the conjugate kernel and neural tangent kernel for linear-width neural networks. *Advances in Neural Information Processing Systems*, 2020.
- Michel Gaudin. Sur la loi limite de l’espacement des valeurs propres d’une matrice aléatoire. *Nuclear Physics*, 25:447–458, 1961.
- Behrooz Ghorbani, Song Mei, Theodor Misiakiewicz, and Andrea Montanari. Linearized two-layers neural networks in high dimension. *The Annals of Statistics*, 49(2):1029–1054, 2021.
- Surbhi Goel and Adam R Klivans. Learning neural networks with two nonlinear layers in polynomial time. In *Conference on Learning Theory*, 2019.
- Sebastian Goldt, Bruno Loureiro, Galen Reeves, Florent Krzakala, Marc Mézard, and Lenka Zdeborová. The Gaussian equivalence of generative models for learning with shallow neural networks. In *Mathematical and Scientific Machine Learning*, pp. 426–471, 2022.
- Géza Györgyi and Naftali Tishby. Statistical theory of learning a rule. *Neural Networks and Spin Glasses*, pp. 3–36, 1990.
- Hamed Hassani and Adel Javanmard. The curse of overparametrization in adversarial training: Precise analysis of robust generalization for random features regression. *arXiv preprint arXiv:2201.05149*, 2022.
- Hong Hu and Yue M Lu. Universality laws for high-dimensional learning with random features. *IEEE Transactions on Information Theory*, 69(3), 2023.
- Jiaoyang Huang and Horng-Tzer Yau. Dynamics of deep neural networks and neural tangent hierarchy. In *International Conference on Machine Learning*, 2020.
- Arthur Jacot, Franck Gabriel, and Clément Hongler. Neural tangent kernel: Convergence and generalization in neural networks. In *Advances in Neural Information Processing Systems*, 2018.
- Arun Kumar Kuchibhotla and Abhishek Chakraborty. Moving beyond sub-gaussianity in high-dimensional statistics: Applications in covariance estimation and linear regression. *Information and Inference: A Journal of the IMA*, 11(4):1389–1456, 2022.
- Donghwan Lee, Behrad Moniri, Xinmeng Huang, Edgar Dobriban, and Hamed Hassani. Demystifying disagreement-on-the-line in high dimensions. In *International Conference on Machine Learning*, 2023.
- Jaehoon Lee, Lechao Xiao, Samuel Schoenholz, Yasaman Bahri, Roman Novak, Jascha Sohl-Dickstein, and Jeffrey Pennington. Wide neural networks of any depth evolve as linear models under gradient descent. In *Advances in Neural Information Processing Systems*, 2019.
- Licong Lin and Edgar Dobriban. What causes the test error? going beyond bias-variance via ANOVA. *Journal of Machine Learning Research*, 22:155–1, 2021.
- Cosme Louart, Zhenyu Liao, and Romain Couillet. A random matrix approach to neural networks. *The Annals of Applied Probability*, 28(2):1190–1248, 2018.
- Bruno Loureiro, Cedric Gerbelot, Hugo Cui, Sebastian Goldt, Florent Krzakala, Marc Mezard, and Lenka Zdeborová. Learning curves of generic features maps for realistic datasets with a teacher-student model. In *Advances in Neural Information Processing Systems*, 2021.
- Yue M Lu and Horng-Tzer Yau. An equivalence principle for the spectrum of random inner-product kernel matrices. *arXiv preprint arXiv:2205.06308*, 2022.
- Madan Lal Mehta. *Random matrices*. Elsevier, 2004.
- Song Mei and Andrea Montanari. The generalization error of random features regression: Precise asymptotics and the double descent curve. *Communications on Pure and Applied Mathematics*, 75(4):667–766, 2022.

- Song Mei, Andrea Montanari, and Phan-Minh Nguyen. A mean field view of the landscape of two-layer neural networks. *Proceedings of the National Academy of Sciences*, 115(33):E7665–E7671, 2018.
- Song Mei, Theodor Misiakiewicz, and Andrea Montanari. Mean-field theory of two-layers neural networks: dimension-free bounds and kernel limit. In *Conference on Learning Theory*, 2019.
- Gabriel Mel and Jeffrey Pennington. Anisotropic random feature regression in high dimensions. In *International Conference on Learning Representations*, 2021.
- Theodor Misiakiewicz. Spectrum of inner-product kernel matrices in the polynomial regime and multiple descent phenomenon in kernel ridge regression. *arXiv preprint arXiv:2204.10425*, 2022.
- Andrea Montanari and Basil N Saeed. Universality of empirical risk minimization. In *Conference on Learning Theory*, 2022.
- Andrea Montanari, Feng Ruan, Youngtak Sohn, and Jun Yan. The generalization error of max-margin linear classifiers: High-dimensional asymptotics in the overparametrized regime. *arXiv preprint arXiv:1911.01544*, 2019.
- Eshaan Nichani, Alex Damian, and Jason D Lee. Provable guarantees for nonlinear feature learning in three-layer neural networks. *arXiv preprint arXiv:2305.06986*, 2023.
- Ryan O’Donnell. *Analysis of boolean functions*. Cambridge University Press, 2014.
- Manfred Opper. Statistical mechanics of learning: Generalization. *The Handbook of Brain Theory and Neural Networks*, pp. 922–925, 1995.
- Manfred Opper and Wolfgang Kinzel. Statistical mechanics of generalization. In *Models of Neural Networks III*, pp. 151–209. Springer, 1996.
- Debashis Paul and Alexander Aue. Random matrix theory in statistics: A review. *Journal of Statistical Planning and Inference*, 150:1–29, 2014.
- Sandrine Péché. A note on the Pennington-Worah distribution. *Electronic Communications in Probability*, 24:1–7, 2019.
- Jeffrey Pennington and Pratik Worah. Nonlinear random matrix theory for deep learning. In *Advances in Neural Information Processing Systems*, 2017.
- Adityanarayanan Radhakrishnan, Daniel Beaglehole, Parthe Pandit, and Mikhail Belkin. Feature learning in neural networks and kernel machines that recursively learn features. *arXiv preprint arXiv:2212.13881*, 2022.
- Ali Rahimi and Benjamin Recht. Random features for large-scale kernel machines. In *Advances in Neural Information Processing Systems*, 2007.
- Šarūnas Raudys. On determining training sample size of linear classifier. *Computing Systems (in Russian)*, 28:79–87, 1967.
- Šarūnas Raudys. On the amount of a priori information in designing the classification algorithm. *Technical Cybernetics (in Russian)*, 4:168–174, 1972.
- Šarūnas Raudys and Dean M Young. Results in statistical discriminant analysis: A review of the former Soviet Union literature. *Journal of Multivariate Analysis*, 89(1):1–35, 2004.
- Holger Sambale. Some notes on concentration for  $\alpha$ -subexponential random variables. In *High Dimensional Probability IX: The Ethereal Volume*, pp. 167–192. Springer, 2023.
- Vadim Ivanovich Serdobolskii. *Multiparametric Statistics*. Elsevier, 2007.
- Zhenmei Shi, Junyi Wei, and Yingyu Liang. A theoretical analysis on feature learning in neural networks: Emergence from inputs and advantage over fixed features. In *International Conference on Learning Representations*, 2022.

- Justin Sirignano and Konstantinos Spiliopoulos. Mean field analysis of neural networks: A central limit theorem. *Stochastic Processes and their Applications*, 130(3):1820–1852, 2020.
- Gilbert W Stewart and Ji-guang Sun. *Matrix perturbation theory*. Elsevier, 1990.
- Terence Tao and Van Vu. Random matrices: universality of local eigenvalue statistics. *Acta mathematica*, 206(1):127–204, 2011.
- Nilesh Tripuraneni, Ben Adlam, and Jeffrey Pennington. Overparameterization improves robustness to covariate shift in high dimensions. In *Advances in Neural Information Processing Systems*, 2021.
- Antonio M Tulino and Sergio Verdú. Random matrix theory and wireless communications. *Communications and Information Theory*, 1(1):1–182, 2004.
- Aad van der Vaart and Jon Wellner. *Weak convergence and empirical processes: with applications to statistics*. Springer Science & Business Media, 2013.
- Roman Vershynin. Introduction to the non-asymptotic analysis of random matrices. In Yonina C. Eldar and Gitta Kutyniok (eds.), *Compressed Sensing: Theory and Applications*, pp. 210–268. Cambridge University Press, 2012.
- Roman Vershynin. *High-dimensional probability: An introduction with applications in data science*. Cambridge University Press, 2018.
- Mariia Vladimirova, Stéphane Girard, Hien Nguyen, and Julyan Arbel. Sub-weibull distributions: Generalizing sub-gaussian and sub-exponential properties to heavier tailed distributions. *Stat*, 9(1), 2020.
- Zhichao Wang, Andrew Engel, Anand Sarwate, Ioana Dumitriu, and Tony Chiang. Spectral evolution and invariance in linear-width neural networks. *arXiv preprint arXiv:2211.06506*, 2022.
- Per-Ake Wedin. Perturbation bounds in connection with singular value decomposition. *BIT Numerical Mathematics*, 12:99–111, 1972.
- Eugene P Wigner. Characteristic vectors of bordered matrices with infinite dimensions. *Annals of Mathematics*, pp. 548–564, 1955.
- Lechao Xiao, Hong Hu, Theodor Misiakiewicz, Yue Lu, and Jeffrey Pennington. Precise learning curves and higher-order scalings for dot-product kernel regression. In *Advances in Neural Information Processing Systems*, 2022.
- Greg Yang and Edward J Hu. Feature learning in infinite-width neural networks. In *International Conference on Machine Learning*, 2021.
- Jianfeng Yao, Zhidong Bai, and Shurong Zheng. *Large Sample Covariance Matrices and High-Dimensional Data Analysis*. Cambridge University Press, 2015.
- Huiming Zhang and Songxi Chen. Concentration inequalities for statistical inference. *Communications in Mathematical Research*, 37(1):1–85, 2021.
- Shi Zhenmei, Junyi Wei, and Yingyu Liang. A theoretical analysis on feature learning in neural networks: Emergence from inputs and advantage over fixed features. In *International Conference on Learning Representations*, 2022.

## A ADDITIONAL RELATED WORK

**Theory of Shallow Neural Networks.** Two-layer neural networks have been studied extensively in the mean-field regime (see e.g., Mei et al. (2018; 2019); Sirignano & Spiliopoulos (2020), etc.), and the neural tangent kernel (NTK) regime (see e.g., Jacot et al. (2018); Lee et al. (2019); Huang & Yau (2020), etc.). However, these results often require the neural net to have an extremely large width.

In particular, in the NTK regime, this large width will result in features not evolving over the course of training. Ghorbani et al. (2021) show that for NTKs, with a sample size linear in size of the input, non-linear functions cannot be learned. See also (Misiakiewicz, 2022; Xiao et al., 2022; Lu & Yau, 2022). Goel & Klivans (2019) provide a polynomial time algorithm that learns neural networks with two non-linear layers. Our setting is different because we do not apply a non-linear activation after the second layer. Chen et al. (2022) show that learning two-hidden-layer neural networks from noise-free Gaussian data requires superpolynomially many statistical queries.

**Feature Learning.** Damian et al. (2022) study the problem of learning polynomials with only a few relevant directions and show a sample complexity improvement over kernel methods. Nichani et al. (2023) provide theoretical evidence that three-layer neural networks have provably richer feature learning capabilities than their two-layer counterparts. Zhenmei et al. (2022) show that neural networks trained by gradient descent can succeed on problems where the labels are determined by a set of class-relevant patterns and if these patterns are removed, no polynomial algorithm in the Statistical Query model can learn even weakly.

## B ADDITIONAL NOTATION AND TERMINOLOGY

In the appendix, we use the following additional notations. We let  $\mathbb{N}_0 = \{0, 1, 2, \dots\}$  be the set of non-negative integers. For a set  $X$  and  $x_1, x_2 \in X$ ,  $\delta_{x_1, x_2}$  is the Kronecker delta, which equals unity if  $x_1 = x_2$ , and is zero otherwise. We use  $\tilde{O}(\cdot)$  for the standard big-O notation up to logarithmic factors in  $n$ . For a positive integer  $k$ ,  $k!!$  is the product of all the positive integers up to  $n$  with the same parity as  $n$ . For two random quantities  $X, Y$ ,  $X \perp Y$  denotes that  $X$  is independent of  $Y$ . By orderwise analysis, we mean bounding a term by the triangle inequality and the inequality  $\|Ab\|_2 \leq \|A\|_{\text{op}} \|b\|_2$  for a conformable matrix-vector pair  $A, b$ , to reduce it to operator norms of matrices and Euclidean norms of vectors, and then use simple bounds for those quantities. Constants such as  $C, c'$ , etc., can change from line to line unless specified otherwise. For two random quantities  $A, B$ ,  $A \stackrel{d}{=} B$  denotes that  $A$  and  $B$  have the same distribution. Limits of random variables are understood in probability. For two matrices  $\mathbf{A}, \mathbf{B}$  with equal shape, we write  $\mathbf{A} \circ \mathbf{B}$  to denote their entry-wise (Hadamard) product.

We denote  $\mathbf{X}\beta = \theta$ ,  $\tilde{\mathbf{X}}\beta = \tilde{\theta}$ ,  $\mathbf{X}\beta_\star = \theta_\star$ , and  $\tilde{\mathbf{X}}\beta_\star = \tilde{\theta}_\star$ . We also define  $\bar{\mathbf{R}}_0 = (\mathbf{F}_0\mathbf{F}_0^\top + \lambda n\mathbf{I}_n)^{-1}$  and  $\mathbf{R}_0 = (\mathbf{F}_0^\top\mathbf{F}_0 + \lambda n\mathbf{I}_N)^{-1}$ .

## C BASIC LEMMAS

**Lemma C.1** (Orthogonality of Hermite polynomials). *Let  $(Z_1, Z_2)$  be jointly Gaussian with  $\mathbb{E}[Z_1] = \mathbb{E}[Z_2] = 0$ ,  $\mathbb{E}[Z_1^2] = \mathbb{E}[Z_2^2] = 1$ , and  $\mathbb{E}[Z_1 Z_2] = \rho$ . Then for any  $k_1, k_2 \in \mathbb{N}_0$ ,*

$$\mathbb{E}[H_{k_1}(Z_1)H_{k_2}(Z_2)] = k_1! \rho^{k_1} \delta_{k_1, k_2}.$$

*In particular, if for some positive integer  $d$ ,  $\mathbf{Z} \sim \mathcal{N}(0, \mathbf{I}_d)$ , and if  $\mathbf{a}, \mathbf{b} \in \mathbb{S}^{d-1}$ , then*

$$\mathbb{E}[H_{k_1}(\mathbf{a}^\top \mathbf{Z})H_{k_2}(\mathbf{b}^\top \mathbf{Z})] = k_1! (\mathbf{a}^\top \mathbf{b})^{k_1} \delta_{k_1, k_2}.$$

*Proof.* See (O’Donnell, 2014, Chapter 11.2). □

**Lemma C.2** (Taylor expansion of Hermite polynomials). *For any  $k \in \mathbb{N}_0$  and  $x, y \in \mathbb{R}$ ,*

$$H_k(x + y) = \sum_{j=0}^k \binom{k}{j} x^j H_{k-j}(y).$$



*Proof.* Note that  $\frac{d}{dx}H_k(x) = kH_{k-1}(x)$  (Abramowitz & Stegun, 1968, Equation 22.8.8) and thus  $\frac{d^j}{dx^j}H_k(x) = \frac{k!}{(k-j)!}H_{k-j}(x)$ . By Taylor expanding  $H_k(x+y)$  at  $y$ , we find

$$H_k(x+y) = \sum_{j=0}^k \frac{x^j}{j!} \frac{d^j}{dy^j} H_k(y) = \sum_{j=0}^k \binom{k}{j} x^j H_{k-j}(y).$$

□

The following Lemma, proved in Section N.1, provides several bounds used in the proofs.

**Lemma C.3.** *Under Conditions 2.1-2.4, there exists  $C > 0$  such that the following holds with probability  $1 - o(1)$ .*

- (a)  $M_{\mathbf{a}} := \max_{1 \leq i \leq N} |a_i| \leq Cn^{-\frac{1}{2}} \log^{\frac{1}{2}} n$ ,
- (b)  $M_{\boldsymbol{\beta}} := \max_{1 \leq i \leq n} |\langle \tilde{\mathbf{x}}_i, \boldsymbol{\beta} \rangle| \leq C \log^{\frac{1}{2}} n$ ,
- (c)  $M_{\mathbf{W}_0} := \sup_{k \geq 1} \|(\mathbf{W}_0 \mathbf{W}_0^\top)^{\circ k}\|_{\text{op}} \leq C$ ,
- (d)  $\|\tilde{\mathbf{X}}\|_{\text{op}} \leq C\sqrt{n}$ .

## D PROOF OF PROPOSITION 3.1

*Proof.* By Lemma K.1 with  $\mathbf{v} = \boldsymbol{\beta}_*$  and  $\mathbf{D} = \mathbf{I}_d$ , we have

$$\begin{aligned} \boldsymbol{\beta}_*^\top \boldsymbol{\beta} &\rightarrow_P c_{*,1} \|\boldsymbol{\beta}_*\|_2^2 = c_{*,1}, \\ \|\boldsymbol{\beta}\|_2^2 &= \boldsymbol{\beta}^\top \boldsymbol{\beta} \rightarrow_P \phi(c_*^2 + \sigma_\varepsilon^2) + c_{*,1}^2 \boldsymbol{\beta}_*^\top \boldsymbol{\beta}_* = c_{*,1}^2 + \phi(c_*^2 + \sigma_\varepsilon^2). \end{aligned}$$

By the continuous mapping theorem, we conclude

$$\frac{|\boldsymbol{\beta}_*^\top \boldsymbol{\beta}|}{\|\boldsymbol{\beta}_*\|_2 \|\boldsymbol{\beta}\|_2} \rightarrow_P \frac{|c_{*,1}|}{\sqrt{c_{*,1}^2 + \phi(c_*^2 + \sigma_\varepsilon^2)}}.$$

□

## E PROOF OF LEMMA 3.2

*Proof.* For  $k = 1$ , we have by (Ba et al., 2022, Proposition 2)—substituting our  $c_1$  for their  $\mu_1$  and using that  $\boldsymbol{\beta} = \frac{1}{n} \mathbf{X}^\top \mathbf{y}$ ; as well as noting that by the discussion below (Ba et al., 2022, Proposition 2),  $\|\mathbf{G}\|_{\text{op}} = O_{\mathbb{P}}(1)$ —and by Lemma C.3 (d), that with probability  $1 - o(1)$ ,

$$\|\tilde{\mathbf{X}} \mathbf{G}^\top - c_1 \tilde{\mathbf{X}} \boldsymbol{\beta} \mathbf{a}^\top\|_{\text{op}} = O(n^{-\frac{1}{2}} \log^2 n). \quad (7)$$

For  $k \geq 2$ , expanding  $(\tilde{\mathbf{X}} \mathbf{G}^\top)^{\circ k} = (\tilde{\mathbf{X}} \mathbf{G}^\top - c_1 \tilde{\mathbf{X}} \boldsymbol{\beta} \mathbf{a}^\top + c_1 \tilde{\mathbf{X}} \boldsymbol{\beta} \mathbf{a}^\top)^{\circ k}$  using the binomial formula, we have

$$\begin{aligned} (\tilde{\mathbf{X}} \mathbf{G}^\top)^{\circ k} - c_1^k (\tilde{\mathbf{X}} \boldsymbol{\beta})^{\circ k} (\mathbf{a}^{\circ k})^\top &= \sum_{j=1}^k \binom{k}{j} (\tilde{\mathbf{X}} \mathbf{G}^\top - c_1 \tilde{\mathbf{X}} \boldsymbol{\beta} \mathbf{a}^\top)^{\circ j} \circ (c_1 \tilde{\mathbf{X}} \boldsymbol{\beta} \mathbf{a}^\top)^{\circ(k-j)} \\ &= \sum_{j=1}^k \binom{k}{j} c_1^{k-j} \text{diag}(\tilde{\mathbf{X}} \boldsymbol{\beta})^{k-j} (\tilde{\mathbf{X}} \mathbf{G}^\top - c_1 \tilde{\mathbf{X}} \boldsymbol{\beta} \mathbf{a}^\top)^{\circ j} \text{diag}(\mathbf{a})^{k-j}. \end{aligned}$$

Recalling  $M_{\mathbf{a}}, M_{\boldsymbol{\beta}}$  from Lemma C.3, and using that

$$\|(\tilde{\mathbf{X}} \mathbf{G}^\top - c_1 \tilde{\mathbf{X}} \boldsymbol{\beta} \mathbf{a}^\top)^{\circ j}\|_{\text{op}} \leq \|\tilde{\mathbf{X}} \mathbf{G}^\top - c_1 \tilde{\mathbf{X}} \boldsymbol{\beta} \mathbf{a}^\top\|_{\text{op}}^j$$

(see e.g., (Bai & Silverstein, 2010, Corollary A.21)), we have

$$\begin{aligned} & \|\text{diag}(\tilde{\mathbf{X}}\boldsymbol{\beta})^{k-j}(\tilde{\mathbf{X}}\mathbf{G}^\top - c_1\tilde{\mathbf{X}}\boldsymbol{\beta}\mathbf{a}^\top)^{\circ j}\text{diag}(\mathbf{a})^{k-j}\|_{\text{op}} \\ & \leq \|\text{diag}(\tilde{\mathbf{X}}\boldsymbol{\beta})^{k-j}\|_{\text{op}}\|(\tilde{\mathbf{X}}\mathbf{G}^\top - c_1\tilde{\mathbf{X}}\boldsymbol{\beta}\mathbf{a}^\top)^{\circ j}\|_{\text{op}}\|\text{diag}(\mathbf{a})^{k-j}\|_{\text{op}} \\ & \leq (M_{\mathbf{a}}M_{\boldsymbol{\beta}})^{k-j}\|\tilde{\mathbf{X}}\mathbf{G}^\top - c_1\tilde{\mathbf{X}}\boldsymbol{\beta}\mathbf{a}^\top\|_{\text{op}}^j. \end{aligned}$$

Hence, by the triangle inequality,

$$\|(\tilde{\mathbf{X}}\mathbf{G}^\top)^{\circ k} - c_1^k(\tilde{\mathbf{X}}\boldsymbol{\beta})^{\circ k}(\mathbf{a}^{\circ k})^\top\|_{\text{op}} \leq \sum_{j=1}^k \binom{k}{j} (c_1M_{\mathbf{a}}M_{\boldsymbol{\beta}})^{k-j}\|\tilde{\mathbf{X}}\mathbf{G}^\top - c_1\tilde{\mathbf{X}}\boldsymbol{\beta}\mathbf{a}^\top\|_{\text{op}}^j.$$

By Lemma C.3 (a), (b) and equation 7, there exists  $C > 0$  such that for any  $k \in \mathbb{N}$ ,

$$\begin{aligned} \sum_{j=1}^k \binom{k}{j} (c_1M_{\mathbf{a}}M_{\boldsymbol{\beta}})^{k-j}\|\tilde{\mathbf{X}}\mathbf{G}^\top - c_1\tilde{\mathbf{X}}\boldsymbol{\beta}\mathbf{a}^\top\|_{\text{op}}^j & \leq (C/2)^k \sum_{j=1}^k \binom{k}{j} (n^{-\frac{1}{2}}\log n)^{k-j} (n^{-\frac{1}{2}}\log^2 n)^j \\ & \leq C^k n^{-\frac{k}{2}} \log^{2k} n \end{aligned}$$

with probability  $1 - o(1)$ .  $\square$

## F PROOF OF THEOREM 3.3

*Proof.* We consider any fixed  $\mathbf{W}_0$  such that the event  $\Omega = \{\sup_{k \geq 1} \|(\mathbf{W}_0 \mathbf{W}_0^\top)^{\circ k}\|_{\text{op}} \leq C\}$  from Lemma C.3 (c) holds. By Lemma C.1, each row of  $H_j(\tilde{\mathbf{X}}\mathbf{W}_0^\top)$  has second moment matrix

$$\mathbb{E}_{\mathbf{x} \sim \mathcal{N}(0, \mathbf{I}_d)}[H_j(\mathbf{W}_0 \mathbf{x})H_j(\mathbf{W}_0 \mathbf{x})^\top] = j!(\mathbf{W}_0 \mathbf{W}_0^\top)^{\circ j},$$

whose operator norm is  $O(j!)$  on  $\Omega$ . Thus by (Vershynin, 2012, Theorem 5.48) and Markov's inequality, for any  $j \in [L]$ , for  $t \geq (Cnj!)^{1/2}$ , and with  $M = \mathbb{E} \max_{i=1}^n \|H_j(\mathbf{W}_0 \tilde{\mathbf{x}}_i)\|^2$ ,  $\delta = C\sqrt{M \log \min(n, N)}$ ,

$$\begin{aligned} P(\|H_j(\tilde{\mathbf{X}}\mathbf{W}_0^\top)\|_{\text{op}} \geq t) & \leq P(\|H_j(\tilde{\mathbf{X}}\mathbf{W}_0^\top)H_j(\tilde{\mathbf{X}}\mathbf{W}_0^\top)^\top/n - j!(\mathbf{W}_0 \mathbf{W}_0^\top)^{\circ j}\|_{\text{op}} \geq t^2/n - Cj!) \\ & \leq \frac{\mathbb{E}\|H_j(\tilde{\mathbf{X}}\mathbf{W}_0^\top)H_j(\tilde{\mathbf{X}}\mathbf{W}_0^\top)^\top/n - j!(\mathbf{W}_0 \mathbf{W}_0^\top)^{\circ j}\|_{\text{op}}}{t^2/n - Cj!} \leq \frac{\delta \max((Cj!)^{1/2}, \delta)}{t^2/n - Cj!}. \end{aligned}$$

Next, we observe that since  $H_j$  is a  $j$ -th degree polynomial and the normal absolute moments increase with  $j$ ,  $M = \mathbb{E} \max_{i=1}^n \|H_j(\mathbf{W}_0 \tilde{\mathbf{x}}_i)\|^2 \leq C_j \mathbb{E} \max_{i=1}^n \|(\mathbf{W}_0 \tilde{\mathbf{x}}_i)^{\circ j}\|^2$ . Now, note that for any vectors  $\mathbf{x}_1, \mathbf{x}_2$ , we have  $\|\mathbf{x}_1 \circ \mathbf{x}_2\|^2 \leq \|\mathbf{x}_1\|^2 \|\mathbf{x}_2\|^2$  by simply expanding the norms. Thus, on the event  $\Omega$ , one can verify that for all  $\mathbf{x}$ ,  $\|(\mathbf{W}_0 \mathbf{x})^{\circ j}\|^2 \leq C'_j \|\mathbf{x}\|^{2j}$  for some  $C'_j > 0$ . Also, we have that  $A_i = \|\tilde{\mathbf{x}}_i\|^{2j}/N$  for  $i \in [n]$  are sub-Weibull random variables with tail parameter  $1/(2j)$ , see e.g., Vladimirova et al. (2020); Zhang & Chen (2021). Thus, by the maximal inequality for sub-Weibull random variables (Kuchibhotla & Chakraborty, 2022, Proposition A.6 and Remark A.1), it follows that for all  $j \geq 1$ , there is  $C_j > 0$  such that  $\mathbb{E} \max_{i=1}^n A_i \leq C_j (\log n)^{2j}$ . Hence,  $M \leq C''_j N (\log n)^{2j}$ .

Thus, choosing  $t = C' \sqrt{nj!} (\log n)^j$  for sufficiently large  $C'$  leads to

$$\|H_j(\tilde{\mathbf{X}}\mathbf{W}_0^\top)\|_{\text{op}} = O\left(\sqrt{nj!} (\log n)^j\right) \quad (8)$$

with probability  $1 - o(1)$ .

Define, for all  $z \in \mathbb{R}$ ,  $\sigma_L(z) = \sum_{k=0}^L c_k H_k(z)$ , where  $L = \max\{\ell, \frac{\log n}{4(\ell+1) \log \log n}\}$ . Each row of  $(\sigma - \sigma_L)(\tilde{\mathbf{X}}\mathbf{W}_0^\top)$  has second moment matrix

$$\mathbb{E}_{\mathbf{x} \sim \mathcal{N}(0, \mathbf{I}_d)}[(\sigma - \sigma_L)(\mathbf{W}_0 \mathbf{x})(\sigma - \sigma_L)(\mathbf{W}_0 \mathbf{x})^\top] = \sum_{k=L+1}^{\infty} k! c_k^2 (\mathbf{W}_0 \mathbf{W}_0^\top)^{\circ k},$$

whose operator norm is  $O(L^{-\frac{1}{2}-\omega})$  by Lemma C.3 (c) and Condition 2.3. Therefore,

$$\|(\sigma - \sigma_L)(\tilde{\mathbf{X}}\mathbf{W}_0^\top)\|_{\text{op}} = O(\sqrt{n \log n} L^{-\frac{1}{2}-\omega}) = o(\sqrt{n}) \quad (9)$$

with probability  $1 - o(1)$ . Since  $\eta = o(\sqrt{n})$ , the rows of have  $\mathbf{W}$  norm of  $O_{\mathbb{P}}(1)$ . Thus, we can repeat the same argument to show that with probability  $1 - o(1)$ , we have

$$\|(\sigma - \sigma_L)(\tilde{\mathbf{X}}\mathbf{W}^\top)\|_{\text{op}} = O(\sqrt{n \log n} L^{-\frac{1}{2}-\omega}) = o(\sqrt{n}). \quad (10)$$

Let  $\mathbf{F}^{(L)} := \sigma_L(\tilde{\mathbf{X}}\mathbf{W}^\top)$  and  $\mathbf{F}_0^{(L)} := \sigma_L(\tilde{\mathbf{X}}\mathbf{W}_0^\top)$ . We can write

$$\mathbf{F}^{(L)} = \mathbf{F}_0^{(L)} + \sum_{k=1}^L c_k (H_k(\tilde{\mathbf{X}}\mathbf{W}^\top) - H_k(\tilde{\mathbf{X}}\mathbf{W}_0^\top)).$$

By Lemma C.2, using  $\mathbf{W} = \mathbf{W}_0 + \eta \mathbf{G}$  so that  $\tilde{\mathbf{X}}\mathbf{W}^\top = \tilde{\mathbf{X}}\mathbf{W}_0^\top + \eta \tilde{\mathbf{X}}\mathbf{G}^\top$ , and using that  $H_0(z) = 1$  for all  $z \in \mathbb{R}$ ,

$$H_k(\tilde{\mathbf{X}}\mathbf{W}^\top) - H_k(\tilde{\mathbf{X}}\mathbf{W}_0^\top) = \eta^k (\tilde{\mathbf{X}}\mathbf{G}^\top)^{\circ k} + \sum_{j=1}^{k-1} \binom{k}{j} \eta^j H_{k-j}(\tilde{\mathbf{X}}\mathbf{W}_0^\top) \circ (\tilde{\mathbf{X}}\mathbf{G}^\top)^{\circ j}.$$

Therefore,

$$\begin{aligned} \mathbf{F}^{(L)} &= \mathbf{F}_0^{(L)} + \underbrace{\sum_{k=1}^{\ell} c_1^k c_k \eta^k (\tilde{\mathbf{X}}\boldsymbol{\beta})^{\circ k} (\mathbf{a}^{\circ k})^\top + \sum_{k=1}^L c_k \eta^k \left[ (\tilde{\mathbf{X}}\mathbf{G}^\top)^{\circ k} - c_1^k (\tilde{\mathbf{X}}\boldsymbol{\beta})^{\circ k} (\mathbf{a}^{\circ k})^\top \right]}_{\Delta_1} \\ &+ \underbrace{\sum_{k=\ell+1}^L c_1^k c_k \eta^k (\tilde{\mathbf{X}}\boldsymbol{\beta})^{\circ k} (\mathbf{a}^{\circ k})^\top}_{\Delta_2} + \underbrace{\sum_{k=1}^L \sum_{j=1}^{k-1} c_k \binom{k}{j} \eta^j H_{k-j}(\tilde{\mathbf{X}}\mathbf{W}_0^\top) \circ \left[ (\tilde{\mathbf{X}}\mathbf{G}^\top)^{\circ j} - c_1^j (\tilde{\mathbf{X}}\boldsymbol{\beta})^{\circ j} (\mathbf{a}^{\circ j})^\top \right]}_{\Delta_3} \\ &+ \underbrace{\sum_{k=1}^L \sum_{j=1}^{k-1} c_1^j c_k \binom{k}{j} \eta^j H_{k-j}(\tilde{\mathbf{X}}\mathbf{W}_0^\top) \circ \left[ (\tilde{\mathbf{X}}\boldsymbol{\beta})^{\circ j} (\mathbf{a}^{\circ j})^\top \right]}_{\Delta_4}. \end{aligned}$$

We will show that each of  $\|\Delta_1\|_{\text{op}}$ ,  $\|\Delta_2\|_{\text{op}}$ ,  $\|\Delta_3\|_{\text{op}}$ ,  $\|\Delta_4\|_{\text{op}}$  is  $o(\sqrt{n})$  with probability  $1 - o(1)$ .

By Lemma 3.2,

$$\|\Delta_1\|_{\text{op}} \leq \sum_{k=1}^L c_k C^k \eta^k n^{-\frac{k}{2}} \log^{2k} n = \tilde{O}(\eta/\sqrt{n}) = o(\sqrt{n})$$

with probability  $1 - o(1)$ .

By Lemma C.3 (a) and (b), using that  $\alpha < \frac{\ell}{2\ell+2}$ ,

$$\|\Delta_2\|_{\text{op}} \leq \sum_{k=\ell+1}^L c_1^k c_k \eta^k \|(\tilde{\mathbf{X}}\boldsymbol{\beta})^{\circ k}\|_2 \|\mathbf{a}^{\circ k}\|_2 \leq \sum_{k=\ell+1}^L c_1^k c_k \eta^k n M_{\mathbf{a}}^k M_{\boldsymbol{\beta}}^k = \tilde{O}(n(\eta/\sqrt{n})^{\ell+1}) = o(\sqrt{n})$$

with probability  $1 - o(1)$ .

By (Bai & Silverstein, 2010, Corollary A.21), equation 8, and Lemma 3.2,

$$\|\Delta_3\|_{\text{op}} \leq \sum_{k=1}^L \sum_{j=1}^{k-1} c_k C^j \binom{k}{j} \sqrt{(k-j)!} \eta^j n^{-\frac{j}{2} + \frac{1}{2}} \log^{k+j} n = \tilde{O}(\eta) = o(\sqrt{n}).$$

Finally, since

$$\begin{aligned} \|H_{k-j}(\tilde{\mathbf{X}}\mathbf{W}_0^\top) \circ (\tilde{\mathbf{X}}\boldsymbol{\beta})^{\circ j} (\mathbf{a}^{\circ j})^\top\|_{\text{op}} &\leq (M_{\mathbf{a}} M_{\boldsymbol{\beta}})^j \sqrt{(k-j)!} n^{\frac{1}{2}} \log^{k-j} n \\ &\leq C^j \sqrt{(k-j)!} n^{-\frac{j}{2} + \frac{1}{2}} \log^k n, \end{aligned}$$

we also have

$$\|\Delta_4\|_{\text{op}} \leq \sum_{k=1}^L \sum_{j=1}^{k-1} c_k C^j \binom{k}{j} \sqrt{(k-j)!} \eta^j n^{-\frac{j}{2} + \frac{1}{2}} \log^k n = \tilde{O}(\eta) = o(\sqrt{n}).$$

This proves that with probability  $1 - o(1)$ , we have  $\mathbf{F}^{(L)} = \mathbf{F}_0^{(L)} + \sum_{k=1}^{\ell} c_1^k c_k \eta^k (\tilde{\mathbf{X}}\boldsymbol{\beta})^{\circ k} (\mathbf{a}^{\circ k})^\top + \Delta$ , with  $\|\Delta\|_{\text{op}} = o(1)$ . This, alongside equation 9 and equation 10, concludes the proof.  $\square$

## G PROOF OF THEOREM 3.4

By Theorem 3.3, letting  $\mathbf{E} = \mathbf{F}_0 + \Delta$ , we have  $\|\mathbf{E}\|_{\text{op}} = O_{\mathbb{P}}(\sqrt{n})$ . Note that  $\sum_{k=1}^{\ell} c_1^k c_k \eta^k (\tilde{\mathbf{X}}\boldsymbol{\beta})^{\circ k} (\mathbf{a}^{\circ k})^\top$  has rank  $\ell$  **almost surely** and its left singular vector space is  $\text{span}\{(\tilde{\mathbf{X}}\boldsymbol{\beta})^{\circ k}\}_{k \in [\ell]}$ . Also, the subspace spanned by the top- $\ell$  left singular vectors of  $\mathbf{F}$  is  $\mathcal{F}_\ell$ . By Wedin's theorem (Wedin, 1972), (Chen et al., 2021, Theorem 2.9), and as  $\alpha > \frac{\ell-1}{2\ell}$ , we have

$$d(\mathcal{F}_\ell, \text{span}\{(\tilde{\mathbf{X}}\boldsymbol{\beta})^{\circ k}\}_{k \in [\ell]}) = O_{\mathbb{P}}\left(\frac{\|\mathbf{E}\|_{\text{op}}}{\eta^\ell n^{\frac{1}{2} - \frac{\ell-1}{2}} - \|\mathbf{E}\|_{\text{op}}}\right) = O_{\mathbb{P}}(n^{\frac{\ell-1}{2} - \alpha\ell}) = o_{\mathbb{P}}(1).$$

## H PROOF OF THEOREM 4.1

*Proof.* By the definition of  $\hat{\mathbf{a}}(\mathbf{F})$ , we have

$$\begin{aligned} \max\left\{\frac{1}{n}\|\tilde{\mathbf{y}} - \mathbf{F}\hat{\mathbf{a}}(\mathbf{F})\|_2^2, \lambda\|\hat{\mathbf{a}}(\mathbf{F})\|_2^2\right\} &\leq \frac{1}{n}\|\tilde{\mathbf{y}} - \mathbf{F}\hat{\mathbf{a}}(\mathbf{F})\|_2^2 + \lambda\|\hat{\mathbf{a}}(\mathbf{F})\|_2^2 \\ &\leq \frac{1}{n}\|\tilde{\mathbf{y}} - \mathbf{F} \cdot \mathbf{0}\|_2^2 + \lambda\|\mathbf{0}\|_2^2 = \frac{1}{n}\|\tilde{\mathbf{y}}\|_2^2 = O_{\mathbb{P}}(1). \end{aligned}$$

Thus,

$$\|\hat{\mathbf{a}}(\mathbf{F})\|_2 = O_{\mathbb{P}}(1), \quad \|\tilde{\mathbf{y}} - \mathbf{F}\hat{\mathbf{a}}(\mathbf{F})\|_2 = O_{\mathbb{P}}(\sqrt{n}). \quad (11)$$

A similar argument gives

$$\|\hat{\mathbf{a}}(\mathbf{F}_\ell)\|_2 = O_{\mathbb{P}}(1), \quad \|\tilde{\mathbf{y}} - \mathbf{F}_\ell\hat{\mathbf{a}}(\mathbf{F}_\ell)\|_2 = O_{\mathbb{P}}(\sqrt{n}). \quad (12)$$

Also, by the triangle inequality, and using equation 12 and Theorem 3.3, which states  $\|\mathbf{F}_\ell - \mathbf{F}\|_{\text{op}} = O_{\mathbb{P}}(\sqrt{n})$ , we have

$$\begin{aligned} \|\tilde{\mathbf{y}} - \mathbf{F}\hat{\mathbf{a}}(\mathbf{F}_\ell)\|_2 &\leq \|\tilde{\mathbf{y}} - \mathbf{F}_\ell\hat{\mathbf{a}}(\mathbf{F}_\ell)\|_2 + \|(\mathbf{F}_\ell - \mathbf{F})\hat{\mathbf{a}}(\mathbf{F}_\ell)\|_2 \\ &\leq \|\tilde{\mathbf{y}} - \mathbf{F}_\ell\hat{\mathbf{a}}(\mathbf{F}_\ell)\|_2 + \|\mathbf{F}_\ell - \mathbf{F}\|_{\text{op}}\|\hat{\mathbf{a}}(\mathbf{F}_\ell)\|_2 = O_{\mathbb{P}}(\sqrt{n}). \end{aligned} \quad (13)$$

Similarly, we can prove that

$$\|\tilde{\mathbf{y}} - \mathbf{F}_\ell\hat{\mathbf{a}}(\mathbf{F})\|_2 = O_{\mathbb{P}}(\sqrt{n}). \quad (14)$$

For  $\mathbf{a} = \hat{\mathbf{a}}(\mathbf{F})$  or  $\mathbf{a} = \hat{\mathbf{a}}(\mathbf{F}_\ell)$ ,

$$\begin{aligned} \frac{1}{n}(\|\tilde{\mathbf{y}} - \mathbf{F}\mathbf{a}\|_2^2 - \|\tilde{\mathbf{y}} - \mathbf{F}_\ell\mathbf{a}\|_2^2) &= \frac{1}{n}\langle(\mathbf{F}_\ell - \mathbf{F})\mathbf{a}, \tilde{\mathbf{y}} - \mathbf{F}\mathbf{a} + \tilde{\mathbf{y}} - \mathbf{F}_\ell\mathbf{a}\rangle \\ &\leq \frac{1}{n}\|\mathbf{F}_\ell - \mathbf{F}\|_{\text{op}}\|\mathbf{a}\|_2(\|\tilde{\mathbf{y}} - \mathbf{F}\mathbf{a}\|_2 + \|\tilde{\mathbf{y}} - \mathbf{F}_\ell\mathbf{a}\|_2) = o_{\mathbb{P}}(1) \end{aligned}$$

by equation 11, equation 12, equation 13, equation 14, and Theorem 3.3. Therefore, using the definition of  $\hat{\mathbf{a}}(\mathbf{F}_\ell)$ ,

$$\begin{aligned} \frac{1}{n}\|\tilde{\mathbf{y}} - \mathbf{F}_\ell\hat{\mathbf{a}}(\mathbf{F}_\ell)\|_2^2 + \lambda\|\hat{\mathbf{a}}(\mathbf{F}_\ell)\|_2^2 &\leq \frac{1}{n}\|\tilde{\mathbf{y}} - \mathbf{F}_\ell\hat{\mathbf{a}}(\mathbf{F})\|_2^2 + \lambda\|\hat{\mathbf{a}}(\mathbf{F})\|_2^2 \\ &= \frac{1}{n}\|\tilde{\mathbf{y}} - \mathbf{F}\hat{\mathbf{a}}(\mathbf{F})\|_2^2 + \lambda\|\hat{\mathbf{a}}(\mathbf{F})\|_2^2 + o_{\mathbb{P}}(1) \end{aligned}$$

and using the definition of  $\hat{\mathbf{a}}(\mathbf{F})$ ,

$$\begin{aligned} \frac{1}{n}\|\tilde{\mathbf{y}} - \mathbf{F}\hat{\mathbf{a}}(\mathbf{F})\|_2^2 + \lambda\|\hat{\mathbf{a}}(\mathbf{F})\|_2^2 &\leq \frac{1}{n}\|\tilde{\mathbf{y}} - \mathbf{F}\hat{\mathbf{a}}(\mathbf{F}_\ell)\|_2^2 + \lambda\|\hat{\mathbf{a}}(\mathbf{F}_\ell)\|_2^2 \\ &= \frac{1}{n}\|\tilde{\mathbf{y}} - \mathbf{F}_\ell\hat{\mathbf{a}}(\mathbf{F}_\ell)\|_2^2 + \lambda\|\hat{\mathbf{a}}(\mathbf{F}_\ell)\|_2^2 + o_{\mathbb{P}}(1). \end{aligned}$$

These together prove the theorem.  $\square$

## I PROOF OF THEOREM 4.2

First, we will prove a general lemma regarding the equivalence of an augmented training loss. We will later use this result to prove the equivalence of the test loss.

**Lemma I.1.** *Let  $\eta \asymp n^\alpha$  with  $\frac{\ell-1}{2\ell} < \alpha < \frac{\ell}{2\ell+2}$  for some  $\ell \in \mathbb{N}$  and  $\mathbf{F}_\ell$  be defined as in equation 3. For the test risk  $\mathcal{L}_{\text{te}}$  from Section 4.1, define*

$$\mathcal{R}_\zeta(\mathbf{a}, \mathbf{F}) = \frac{1}{n} \|\tilde{\mathbf{y}} - \mathbf{F}\mathbf{a}\|_2^2 + \lambda \|\mathbf{a}\|_2^2 + \zeta \mathcal{L}_{\text{te}}(\mathbf{a}).$$

Then, for any  $\lambda > 0$ ,  $\zeta > 0$ , we have

$$\left| \min_{\mathbf{a}} \mathcal{R}_\zeta(\mathbf{a}, \mathbf{F}_\ell) - \min_{\mathbf{a}} \mathcal{R}_\zeta(\mathbf{a}, \mathbf{F}) \right| = o(1), \quad (15)$$

with probability  $1 - o(1)$ .

*Proof of Lemma I.1.* Letting  $\hat{\mathbf{a}}_\zeta(\mathbf{F}) = \arg \min_{\mathbf{a}} \mathcal{R}_\zeta(\mathbf{a}, \mathbf{F})$ , we can write

$$\begin{aligned} & \max \left\{ \frac{1}{n} \|\tilde{\mathbf{y}} - \mathbf{F}\hat{\mathbf{a}}_\zeta(\mathbf{F})\|_2^2, \lambda \|\hat{\mathbf{a}}_\zeta(\mathbf{F})\|_2^2, \zeta \mathcal{L}_{\text{te}}(\hat{\mathbf{a}}_\zeta(\mathbf{F})) \right\} \\ & \leq \frac{1}{n} \|\tilde{\mathbf{y}} - \mathbf{F}\hat{\mathbf{a}}_\zeta(\mathbf{F})\|_2^2 + \lambda \|\hat{\mathbf{a}}_\zeta(\mathbf{F})\|_2^2 + \zeta \mathcal{L}_{\text{te}}(\hat{\mathbf{a}}_\zeta(\mathbf{F})) \\ & \leq \frac{1}{n} \|\tilde{\mathbf{y}} - \mathbf{F} \cdot \mathbf{0}\|_2^2 + \lambda \|\mathbf{0}\|_2^2 + \zeta \mathcal{L}_{\text{te}}(\mathbf{0}) = O_{\mathbb{P}}(1). \end{aligned}$$

Thus,

$$\mathcal{L}_{\text{te}}(\hat{\mathbf{a}}_\zeta(\mathbf{F})) = O_{\mathbb{P}}(1), \quad \|\hat{\mathbf{a}}_\zeta(\mathbf{F})\|_2 = O_{\mathbb{P}}(1), \quad \|\tilde{\mathbf{y}} - \mathbf{F}\hat{\mathbf{a}}_\zeta(\mathbf{F})\|_2 = O_{\mathbb{P}}(\sqrt{n}). \quad (16)$$

A similar argument gives

$$\mathcal{L}_{\text{te}}(\hat{\mathbf{a}}_\zeta(\mathbf{F}_\ell)) = O_{\mathbb{P}}(1), \quad \|\hat{\mathbf{a}}_\zeta(\mathbf{F}_\ell)\|_2 = O_{\mathbb{P}}(1), \quad \|\tilde{\mathbf{y}} - \mathbf{F}_\ell \hat{\mathbf{a}}_\zeta(\mathbf{F}_\ell)\|_2 = O_{\mathbb{P}}(\sqrt{n}). \quad (17)$$

Also by the triangle inequality, equation 17 and Theorem 3.3, which states  $\|\mathbf{F}_\ell - \mathbf{F}\|_{\text{op}} = o_{\mathbb{P}}(\sqrt{n})$ ,

$$\begin{aligned} \|\tilde{\mathbf{y}} - \mathbf{F}\hat{\mathbf{a}}_\zeta(\mathbf{F}_\ell)\|_2 & \leq \|\tilde{\mathbf{y}} - \mathbf{F}_\ell \hat{\mathbf{a}}_\zeta(\mathbf{F}_\ell)\|_2 + \|(\mathbf{F}_\ell - \mathbf{F})\hat{\mathbf{a}}_\zeta(\mathbf{F}_\ell)\|_2 \\ & \leq \|\tilde{\mathbf{y}} - \mathbf{F}_\ell \hat{\mathbf{a}}_\zeta(\mathbf{F}_\ell)\|_2 + \|\mathbf{F}_\ell - \mathbf{F}\|_{\text{op}} \|\hat{\mathbf{a}}_\zeta(\mathbf{F}_\ell)\|_2 = O_{\mathbb{P}}(\sqrt{n}). \end{aligned} \quad (18)$$

Similarly, we can show that

$$\|\tilde{\mathbf{y}} - \mathbf{F}_\ell \hat{\mathbf{a}}_\zeta(\mathbf{F})\|_2 = O_{\mathbb{P}}(\sqrt{n}). \quad (19)$$

For  $\mathbf{a} = \hat{\mathbf{a}}_\zeta(\mathbf{F})$  or  $\mathbf{a} = \hat{\mathbf{a}}_\zeta(\mathbf{F}_\ell)$ ,

$$\begin{aligned} \frac{1}{n} (\|\tilde{\mathbf{y}} - \mathbf{F}\mathbf{a}\|_2^2 - \|\tilde{\mathbf{y}} - \mathbf{F}_\ell \mathbf{a}\|_2^2) & = \frac{1}{n} \langle (\mathbf{F}_\ell - \mathbf{F})\mathbf{a}, \tilde{\mathbf{y}} - \mathbf{F}\mathbf{a} + \tilde{\mathbf{y}} - \mathbf{F}_\ell \mathbf{a} \rangle \\ & \leq \frac{1}{n} \|\mathbf{F}_\ell - \mathbf{F}\|_{\text{op}} \|\mathbf{a}\|_2 (\|\tilde{\mathbf{y}} - \mathbf{F}\mathbf{a}\|_2 + \|\tilde{\mathbf{y}} - \mathbf{F}_\ell \mathbf{a}\|_2) = o_{\mathbb{P}}(1) \end{aligned}$$

by equation 16, equation 17, equation 18, equation 19, and Theorem 3.3. Therefore, using the definition of  $\hat{\mathbf{a}}_\zeta(\mathbf{F}_\ell)$ ,

$$\begin{aligned} & \frac{1}{n} \|\tilde{\mathbf{y}} - \mathbf{F}_\ell \hat{\mathbf{a}}_\zeta(\mathbf{F}_\ell)\|_2^2 + \lambda \|\hat{\mathbf{a}}_\zeta(\mathbf{F}_\ell)\|_2^2 + \zeta \mathcal{L}_{\text{te}}(\hat{\mathbf{a}}_\zeta(\mathbf{F}_\ell)) \\ & \leq \frac{1}{n} \|\tilde{\mathbf{y}} - \mathbf{F}_\ell \hat{\mathbf{a}}_\zeta(\mathbf{F})\|_2^2 + \lambda \|\hat{\mathbf{a}}_\zeta(\mathbf{F})\|_2^2 + \zeta \mathcal{L}_{\text{te}}(\hat{\mathbf{a}}_\zeta(\mathbf{F})) \\ & = \frac{1}{n} \|\tilde{\mathbf{y}} - \mathbf{F}\hat{\mathbf{a}}_\zeta(\mathbf{F})\|_2^2 + \lambda \|\hat{\mathbf{a}}_\zeta(\mathbf{F})\|_2^2 + \zeta \mathcal{L}_{\text{te}}(\hat{\mathbf{a}}_\zeta(\mathbf{F})) + o_{\mathbb{P}}(1), \end{aligned}$$

and using the definition of  $\hat{\mathbf{a}}_\zeta(\mathbf{F})$ ,

$$\begin{aligned} & \frac{1}{n} \|\tilde{\mathbf{y}} - \mathbf{F}\hat{\mathbf{a}}_\zeta(\mathbf{F})\|_2^2 + \lambda \|\hat{\mathbf{a}}_\zeta(\mathbf{F})\|_2^2 + \zeta \mathcal{L}_{\text{te}}(\hat{\mathbf{a}}_\zeta(\mathbf{F})) \\ & \leq \frac{1}{n} \|\tilde{\mathbf{y}} - \mathbf{F}_\ell \hat{\mathbf{a}}_\zeta(\mathbf{F}_\ell)\|_2^2 + \lambda \|\hat{\mathbf{a}}_\zeta(\mathbf{F}_\ell)\|_2^2 + \zeta \mathcal{L}_{\text{te}}(\hat{\mathbf{a}}_\zeta(\mathbf{F}_\ell)) \\ & = \frac{1}{n} \|\tilde{\mathbf{y}} - \mathbf{F}_\ell \hat{\mathbf{a}}_\zeta(\mathbf{F}_\ell)\|_2^2 + \lambda \|\hat{\mathbf{a}}_\zeta(\mathbf{F}_\ell)\|_2^2 + \zeta \mathcal{L}_{\text{te}}(\hat{\mathbf{a}}_\zeta(\mathbf{F}_\ell)) + o_{\mathbb{P}}(1). \end{aligned}$$

Putting these together, we have

$$|\min_{\mathbf{a}} \mathcal{R}_\zeta(\mathbf{a}, \mathbf{F}_\ell) - \min_{\mathbf{a}} \mathcal{R}_\zeta(\mathbf{a}, \mathbf{F})| = o_{\mathbb{P}}(1), \quad (20)$$

which concludes the proof.  $\square$

Now, we use this lemma to prove the equivalence of the test loss.

*Proof of Theorem 4.2.* We will argue by contradiction. Assume that  $\mathcal{L}_{\mathbf{F}} \neq \mathcal{L}_{\mathbf{F}_\ell}$  and let  $\mathcal{L} = \frac{1}{2}(\mathcal{L}_{\mathbf{F}} + \mathcal{L}_{\mathbf{F}_\ell})$ . Now, consider the following two optimization problems:

$$\mathcal{L}_1 = \min_{\mathcal{L}_{\text{te}}(\mathbf{a}) \leq \mathcal{L}} \frac{1}{n} \|\tilde{\mathbf{y}} - \mathbf{F}\mathbf{a}\|_2^2 + \lambda \|\mathbf{a}\|_2^2, \quad \mathcal{L}_2 = \min_{\mathcal{L}_{\text{te}}(\mathbf{a}) \leq \mathcal{L}} \frac{1}{n} \|\tilde{\mathbf{y}} - \mathbf{F}_\ell \mathbf{a}\|_2^2 + \lambda \|\mathbf{a}\|_2^2.$$

Without loss of generality, assume that  $\mathcal{L}_{\mathbf{F}} < \mathcal{L}_{\mathbf{F}_\ell}$ . The solution of the first optimization problem will still converge to  $\mathcal{L}_{\text{tr}}(\mathbf{F})$  because  $\mathcal{L}_{\mathbf{F}} < \mathcal{L}$ . However, the solution of the second optimization problem will converge to a value greater than  $\mathcal{L}_{\text{tr}}(\mathbf{F}_\ell)$ , because  $\mathcal{L}_{\mathbf{F}_\ell} > \mathcal{L}$  and the objective is  $\lambda$ -strongly convex. Note that by Theorem 4.1, we asymptotically have  $\mathcal{L}_{\text{tr}}(\mathbf{F}_\ell) = \mathcal{L}_{\text{tr}}(\mathbf{F})$ . Thus  $\mathcal{L}_1$  and  $\mathcal{L}_2$  converge to different quantities as  $n \rightarrow \infty$ . However, using the minimax theorem and since the objectives are  $\lambda$ -strongly convex, we can write

$$\begin{aligned} \mathcal{L}_1 &= \max_{\zeta > 0} -\zeta \mathcal{L} + \min_{\mathbf{a}} \left[ \frac{1}{n} \|\tilde{\mathbf{y}} - \mathbf{F}\mathbf{a}\|_2^2 + \lambda \|\mathbf{a}\|_2^2 + \zeta \mathcal{L}_{\text{te}}(\mathbf{a}) \right], \\ \mathcal{L}_2 &= \max_{\zeta > 0} -\zeta \mathcal{L} + \min_{\mathbf{a}} \left[ \frac{1}{n} \|\tilde{\mathbf{y}} - \mathbf{F}_\ell \mathbf{a}\|_2^2 + \lambda \|\mathbf{a}\|_2^2 + \zeta \mathcal{L}_{\text{te}}(\mathbf{a}) \right]. \end{aligned}$$

According to Lemma I.1, the two minima above converge to the same value for any fixed  $\zeta$ . Note that, as functions of  $\zeta$ , both maxima are concave as they are minima of linear functions of  $\zeta$ . Hence, by using the concave version of (Abbasi et al., 2019, Lemma 1), we have that  $\mathcal{L}_1$  and  $\mathcal{L}_2$  converge to the same value, which is a contradiction.  $\square$

## J GAUSSIAN EQUIVALENCE CONJECTURE

Results similar in spirit to Gaussian equivalence (Conjecture 4.3) for non-linear random matrices were introduced in El Karoui (2010); Cheng & Singer (2013); Fan & Montanari (2019). They have been repeatedly used in recent studies of random feature models Mei & Montanari (2022); Montanari et al. (2019); Adlam & Pennington (2020a;b); Tripuraneni et al. (2021); Goldt et al. (2022); Mel & Pennington (2021); d’Ascoli et al. (2021); Loureiro et al. (2021); Lee et al. (2023); Hassani & Javanmard (2022); Hu & Lu (2023); Montanari & Saeed (2022). Also, there has been progress on proving the Gaussian equivalence property for a multi-layer network with only the final layer trained Bosch et al. (2023); Cui et al. (2023).

In more distantly related work in random matrix theory literature, the phenomenon that eigenvalue statistics in the bulk spectrum of a random matrix do not depend on the specific law of the matrix entries is referred to as “bulk universality” Wigner (1955); Gaudin (1961); Mehta (2004); Dyson (1962); Erdős et al. (2010; 2012); El Karoui (2010); Tao & Vu (2011).

Erdős (2019) shows that local spectral laws of correlated random Hermitian matrices can be fully determined by their first and second moments, through the matrix Dyson equation. Also, Banna et al. (2015; 2020) show that spectral distributions of correlated symmetric random matrices can be characterized by Gaussian matrices with matching correlation structures.

In our case, we apply the Gaussian equivalence conjecture to the following quantities for  $p, q \in \mathbb{N}_0$  and  $\beta_1, \beta_2 \in \{\beta, \beta_\star\}$ :  $H_p(\tilde{\mathbf{X}}\beta_1)^\top \mathbf{R}_0 H_q(\tilde{\mathbf{X}}\beta_2)$ , and  $\frac{1}{\sqrt{N}} H_p(\tilde{\mathbf{X}}\beta_1)^\top \mathbf{R}_0 \mathbf{F}_0 H_q(N^{1/2}\mathbf{a})$ .

## K PROOFS OF RESULTS FROM SECTION 4.2

Here, we will prove the results in Section 4.2. First, we will provide several lemmas, which will be used in our proofs. The first lemma allows us to approximate linear and quadratic forms of  $\beta$  in terms of  $\beta_\star$ ; the quadratic form result is from Ba et al. (2022). Its proof is in Section N.2.

**Lemma K.1.** For any  $d \in \mathbb{N}$ , let  $\mathbf{v} \in \mathbb{R}^d$  and  $\mathbf{D} \in \mathbb{R}^{d \times d}$  be vectors and matrices, fixed or independent of  $\mathbf{X}, \beta_*, \varepsilon_1, \dots, \varepsilon_n$ , and satisfy  $\|\mathbf{v}\|_2, \|\mathbf{D}\|_{\text{op}} \leq C$  almost surely, uniformly for some constant  $C > 0$ . Under Condition 2.1, we have

$$|\mathbf{v}^\top \beta - c_{*,1} \mathbf{v}^\top \beta_*| \rightarrow 0, \quad \left| \beta^\top \mathbf{D} \beta - \frac{1}{n} (c_*^2 + \sigma_\varepsilon^2) \text{tr} \mathbf{D} - c_{*,1}^2 \beta_*^\top \mathbf{D} \beta_* \right| \rightarrow 0$$

in probability as  $d \rightarrow \infty$ .

We will use the expression derived for the training loss in the following lemma; see Section N.3 for the proof.

**Lemma K.2.** The training loss  $\mathcal{L}_{\text{tr}}(\mathbf{F})$  can be written as

$$\mathcal{L}_{\text{tr}}(\mathbf{F}) = \lambda \tilde{\mathbf{y}}^\top (\mathbf{F} \mathbf{F}^\top + \lambda n \mathbf{I}_n)^{-1} \tilde{\mathbf{y}}.$$

The following lemma will be used in proving concentration of certain quadratic forms appearing in the proofs; see Section N.4 for the proof.

**Lemma K.3.** Let  $g: \mathbb{R} \rightarrow \mathbb{R}$  be a polynomial,  $\mathbf{D} \in \mathbb{R}^{n \times n}$  be a matrix with  $\|\mathbf{D}\|_{\text{op}} = O_{\mathbb{P}}(1/n)$ , and  $\mathbf{Z} \in \mathbb{R}^n$  be a vector of i.i.d. Gaussian random variables with bounded variance independent of  $\mathbf{D}$ . We have

$$\left| g(\mathbf{Z})^\top \mathbf{D} g(\mathbf{Z}) - \mathbb{E}[g(\mathbf{Z})^\top \mathbf{D} g(\mathbf{Z})] \right| \rightarrow_P 0,$$

in which  $g$  is applied elementwise.

The limiting values of two key quadratic forms appearing in the proof are derived in the following lemma, whose proof is deferred to Section N.5.

**Lemma K.4.** Let  $m_1$  and  $m_2$  be the solutions to the system of fixed point equations from equation 4. Then, the following holds:

$$(a) \quad \beta^\top \tilde{\mathbf{X}}^\top \bar{\mathbf{R}}_0 \tilde{\mathbf{X}} \beta = \psi (c_*^2 + \sigma_\varepsilon^2) m_2 + \frac{\psi}{\phi} c_{*,1}^2 m_2 + o_{\mathbb{P}}(1) = \Theta_{\mathbb{P}}(1).$$

$$(b) \quad \mathbf{a}^\top \mathbf{F}_0^\top \bar{\mathbf{R}}_0 \mathbf{F}_0 \mathbf{a} - \|\mathbf{a}\|_2^2 = -\lambda \frac{\psi^2}{\phi^2} m_1 + \frac{\psi}{\phi} - 1 + o_{\mathbb{P}}(1) = \Theta_{\mathbb{P}}(1).$$

In particular,  $\psi (c_*^2 + \sigma_\varepsilon^2) m_2 + \frac{\psi}{\phi} c_{*,1}^2 m_2 \neq 0$  and  $-\lambda \frac{\psi^2}{\phi^2} m_1 + \frac{\psi}{\phi} - 1 \neq 0$ .

The following lemmas will be used in the computations. We defer the proofs of these lemmas to Sections N.6, N.7, N.8, and N.9 respectively.

**Lemma K.5.** For any  $p, q \in \mathbb{N}_0$ ,  $p \neq q$  and any vector  $\mathbf{u} \in \mathbb{R}^n$ , with  $\|\mathbf{u}\|_2 = 1$  independent of  $\bar{\mathbf{R}}_0$ , we have  $H_q(\tilde{\mathbf{X}} \mathbf{u})^\top \bar{\mathbf{R}}_0 H_p(\tilde{\mathbf{X}} \mathbf{u}) = o_{\mathbb{P}}(1)$ .

**Lemma K.6.** For any  $p \in \mathbb{N}$ , we have

$$(a) \quad \sqrt{N} H_p(\tilde{\mathbf{X}} \beta_*) \bar{\mathbf{R}}_0 \mathbf{F}_0 \mathbf{a}^{\circ 2} = o_{\mathbb{P}}(1),$$

$$(b) \quad \sqrt{N} H_p(\tilde{\mathbf{X}} \beta) \bar{\mathbf{R}}_0 \mathbf{F}_0 \mathbf{a}^{\circ 2} = o_{\mathbb{P}}(1).$$

**Lemma K.7.** For  $s \in \{1, 2\}$ ,  $p \in \mathbb{N}$ , and  $p \neq s$ , we have  $H_p(\tilde{\mathbf{X}} \beta_*)^\top \bar{\mathbf{R}}_0 (\tilde{\mathbf{X}} \beta)^{\circ s} = o_{\mathbb{P}}(1)$ . Further,

$$\lim_{n, N, d \rightarrow \infty} H_2(\tilde{\mathbf{X}} \beta_*)^\top \bar{\mathbf{R}}_0 (\tilde{\mathbf{X}} \beta)^{\circ 2} = 2c_{*,1}^2 \frac{\psi m_1}{\phi}.$$

**Lemma K.8.** We have

$$\lim_{n, N, d \rightarrow \infty} (\tilde{\mathbf{X}} \beta)^{\circ 2 \top} \bar{\mathbf{R}}_0 (\tilde{\mathbf{X}} \beta)^{\circ 2} = \frac{3\psi m_1}{\phi} [\phi (c_*^2 + \sigma_\varepsilon^2) + c_{*,1}^2]^2.$$



Now, we will first provide a proof of Theorem 4.4 in the case of  $\ell = 1$  and  $\ell = 2$  for a better insight into the proof techniques. We will then prove the general form in Section L.

### K.1 PROOF FOR $\ell = 1$

*Proof.* In the  $\ell = 1$  regime, due to Theorem 4.1, we can replace  $\mathbf{F}$  by  $\mathbf{F}_1$  (defined in equation 3) to compute the training loss. Hence, from now on we let  $\mathbf{F} = \mathbf{F}_1$ . We can write  $\mathbf{F}\mathbf{F}^\top = \mathbf{F}_0\mathbf{F}_0^\top + \mathbf{U}\mathbf{K}\mathbf{U}^\top$  where  $\mathbf{U} = [\mathbf{F}_0\mathbf{a} \mid \tilde{\mathbf{X}}\boldsymbol{\beta}]$  and

$$\mathbf{K} = \begin{bmatrix} 0 & c_1^2\eta \\ c_1^2\eta & c_1^4\eta^2\|\mathbf{a}\|_2^2 \end{bmatrix}.$$

Based on Lemma K.2, the training loss depends on  $\bar{\mathbf{R}} = (\mathbf{F}\mathbf{F}^\top + \lambda n\mathbf{I}_n)^{-1}$ . Using the Woodbury formula, this matrix can be written in terms of  $\bar{\mathbf{R}}_0 = (\mathbf{F}_0\mathbf{F}_0^\top + \lambda n\mathbf{I}_n)^{-1}$  as

$$\bar{\mathbf{R}} = \bar{\mathbf{R}}_0 - \bar{\mathbf{R}}_0\mathbf{U}(\mathbf{K}^{-1} + \mathbf{U}^\top\bar{\mathbf{R}}_0\mathbf{U})^{-1}\mathbf{U}^\top\bar{\mathbf{R}}_0. \quad (21)$$

Defining  $\mathbf{T} = (\mathbf{K}^{-1} + \mathbf{U}^\top\bar{\mathbf{R}}_0\mathbf{U})^{-1} \in \mathbb{R}^{2 \times 2}$  and substituting  $\bar{\mathbf{R}} = \bar{\mathbf{R}}_0 - \bar{\mathbf{R}}_0\mathbf{U}\mathbf{T}\mathbf{U}^\top\bar{\mathbf{R}}_0$  in the formula for training loss in Lemma K.2, we find

$$\mathcal{L}_{\text{tr}}(\mathbf{F}_0) - \mathcal{L}_{\text{tr}}(\mathbf{F}) = \lambda \tilde{\mathbf{y}}^\top \bar{\mathbf{R}}_0 \mathbf{U} \mathbf{T} \mathbf{U}^\top \bar{\mathbf{R}}_0 \tilde{\mathbf{y}}. \quad (22)$$

Using equation 22 and  $\mathbf{U} = [\mathbf{F}_0\mathbf{a} \mid \tilde{\mathbf{X}}\boldsymbol{\beta}]$ , the loss difference can be written as

$$\begin{aligned} \mathcal{L}_{\text{tr}}(\mathbf{F}_0) - \mathcal{L}_{\text{tr}}(\mathbf{F}) &= \lambda \left[ T_{11} (\tilde{\mathbf{y}}^\top \bar{\mathbf{R}}_0 \mathbf{F}_0 \mathbf{a})^2 \right. \\ &\quad \left. + (T_{12} + T_{21}) \tilde{\mathbf{y}}^\top \bar{\mathbf{R}}_0 \tilde{\mathbf{X}} \boldsymbol{\beta} \cdot \mathbf{a}^\top \mathbf{F}_0^\top \bar{\mathbf{R}}_0 \tilde{\mathbf{y}} + T_{22} (\tilde{\mathbf{y}}^\top \bar{\mathbf{R}}_0 \tilde{\mathbf{X}} \boldsymbol{\beta})^2 \right], \end{aligned} \quad (23)$$

in which  $T_{ij}$  are the elements of the matrix  $\mathbf{T}$ . Using

$$\mathbf{T} = \frac{\begin{bmatrix} \boldsymbol{\beta}^\top \tilde{\mathbf{X}}^\top \bar{\mathbf{R}}_0 \tilde{\mathbf{X}} \boldsymbol{\beta} & -\frac{1}{c_1^2\eta} - \mathbf{a}^\top \mathbf{F}_0^\top \bar{\mathbf{R}}_0 \tilde{\mathbf{X}} \boldsymbol{\beta} \\ -\frac{1}{c_1^2\eta} - \boldsymbol{\beta}^\top \tilde{\mathbf{X}}^\top \bar{\mathbf{R}}_0 \mathbf{F}_0 \mathbf{a} & \mathbf{a}^\top \mathbf{F}_0^\top \bar{\mathbf{R}}_0 \mathbf{F}_0 \mathbf{a} - \|\mathbf{a}\|_2^2 \end{bmatrix}}{\left( \boldsymbol{\beta}^\top \tilde{\mathbf{X}}^\top \bar{\mathbf{R}}_0 \tilde{\mathbf{X}} \boldsymbol{\beta} \right) \left( \mathbf{a}^\top \mathbf{F}_0^\top \bar{\mathbf{R}}_0 \mathbf{F}_0 \mathbf{a} - \|\mathbf{a}\|_2^2 \right) - \left( \frac{1}{c_1^2\eta} + \mathbf{a}^\top \mathbf{F}_0^\top \bar{\mathbf{R}}_0 \tilde{\mathbf{X}} \boldsymbol{\beta} \right)^2},$$

we will compute the limit of each term appearing in equation 23 separately:

**Term 1.** The first term can be written as

$$\begin{aligned} \delta_1 &= \lambda T_{11} (\tilde{\mathbf{y}}^\top \bar{\mathbf{R}}_0 \mathbf{F}_0 \mathbf{a})^2 \\ &= \frac{\lambda (\boldsymbol{\beta}^\top \tilde{\mathbf{X}}^\top \bar{\mathbf{R}}_0 \tilde{\mathbf{X}} \boldsymbol{\beta}) (\tilde{\mathbf{y}}^\top \bar{\mathbf{R}}_0 \mathbf{F}_0 \mathbf{a})^2}{\left( \boldsymbol{\beta}^\top \tilde{\mathbf{X}}^\top \bar{\mathbf{R}}_0 \tilde{\mathbf{X}} \boldsymbol{\beta} \right) \left( \mathbf{a}^\top \mathbf{F}_0^\top \bar{\mathbf{R}}_0 \mathbf{F}_0 \mathbf{a} - \|\mathbf{a}\|_2^2 \right) - \left( \frac{1}{c_1^2\eta} + \mathbf{a}^\top \mathbf{F}_0^\top \bar{\mathbf{R}}_0 \tilde{\mathbf{X}} \boldsymbol{\beta} \right)^2}. \end{aligned}$$

Based on Lemma K.4, we know that  $\boldsymbol{\beta}^\top \tilde{\mathbf{X}}^\top \bar{\mathbf{R}}_0 \tilde{\mathbf{X}} \boldsymbol{\beta}$  and  $\mathbf{a}^\top \mathbf{F}_0^\top \bar{\mathbf{R}}_0 \mathbf{F}_0 \mathbf{a} - \|\mathbf{a}\|_2^2$  are  $\Theta_{\mathbb{P}}(1)$ . Also, it can easily be seen that

$$\|\mathbf{F}_0^\top \bar{\mathbf{R}}_0 \tilde{\mathbf{X}} \boldsymbol{\beta}\|_2 \leq \|\mathbf{F}_0\|_{\text{op}} \|\bar{\mathbf{R}}_0\|_{\text{op}} \|\tilde{\mathbf{X}} \boldsymbol{\beta}\|_2 = O_{\mathbb{P}}(1).$$

Hence,

$$\left( \frac{1}{c_1^2\eta} + \mathbf{a}^\top \mathbf{F}_0^\top \bar{\mathbf{R}}_0 \tilde{\mathbf{X}} \boldsymbol{\beta} \right)^2 = o_{\mathbb{P}}(1) \quad (24)$$

because  $\mathbf{a} \perp \mathbf{F}_0^\top \bar{\mathbf{R}}_0 \tilde{\mathbf{X}} \boldsymbol{\beta}$ . Also, using that  $\bar{\mathbf{R}}_0 \mathbf{F}_0 \mathbf{F}_0^\top = (\mathbf{F}_0 \mathbf{F}_0^\top + \lambda n \mathbf{I}_n)^{-1} \mathbf{F}_0 \mathbf{F}_0^\top = \mathbf{I} - \lambda n \bar{\mathbf{R}}_0$ ,

$$\begin{aligned} (\tilde{\mathbf{y}}^\top \bar{\mathbf{R}}_0 \mathbf{F}_0 \mathbf{a})^2 &= \tilde{\mathbf{y}}^\top \bar{\mathbf{R}}_0 \mathbf{F}_0 \mathbb{E}_a[\mathbf{a} \mathbf{a}^\top] \mathbf{F}_0^\top \bar{\mathbf{R}}_0 \tilde{\mathbf{y}} + o_{\mathbb{P}}(1) \\ &= \frac{1}{N} \tilde{\mathbf{y}}^\top \bar{\mathbf{R}}_0 \mathbf{F}_0 \mathbf{F}_0^\top \bar{\mathbf{R}}_0 \tilde{\mathbf{y}} + o_{\mathbb{P}}(1) = \frac{1}{N} \tilde{\mathbf{y}}^\top \bar{\mathbf{R}}_0 \tilde{\mathbf{y}} - \frac{\lambda n}{N} \tilde{\mathbf{y}}^\top \bar{\mathbf{R}}_0^2 \tilde{\mathbf{y}} + o_{\mathbb{P}}(1) = o_{\mathbb{P}}(1), \end{aligned}$$

where in the last inequality, we used the fact that  $\tilde{\mathbf{y}}^\top \bar{\mathbf{R}}_0 \tilde{\mathbf{y}} \leq \frac{1}{\lambda n} \|\tilde{\mathbf{y}}\|_2^2 = O_{\mathbb{P}}(1)$  and  $\tilde{\mathbf{y}}^\top \bar{\mathbf{R}}_0^2 \tilde{\mathbf{y}} \leq \frac{1}{(\lambda n)^2} \|\tilde{\mathbf{y}}\|_2^2 = o_{\mathbb{P}}(1)$ . Putting everything together, it follows that  $\delta_1 = o_{\mathbb{P}}(1)$  in probability.

**Term 2 and Term 3.** The second and third terms can be written as

$$\begin{aligned} \delta_2 = \delta_3 &= \lambda T_{12} \tilde{\mathbf{y}}^\top \bar{\mathbf{R}}_0 \tilde{\mathbf{X}} \beta \mathbf{a}^\top \mathbf{F}_0^\top \bar{\mathbf{R}}_0 \tilde{\mathbf{y}} \\ &= \frac{\lambda \left( -\frac{1}{c_1^2 \eta} - \mathbf{a}^\top \mathbf{F}_0^\top \bar{\mathbf{R}}_0 \tilde{\mathbf{X}} \beta \right) (\tilde{\mathbf{y}}^\top \bar{\mathbf{R}}_0 \tilde{\mathbf{X}} \beta \mathbf{a}^\top \mathbf{F}_0^\top \bar{\mathbf{R}}_0 \tilde{\mathbf{y}})}{\left( \beta^\top \tilde{\mathbf{X}}^\top \bar{\mathbf{R}}_0 \tilde{\mathbf{X}} \beta \right) \left( \mathbf{a}^\top \mathbf{F}_0^\top \bar{\mathbf{R}}_0 \mathbf{F}_0 \mathbf{a} - \|\mathbf{a}\|_2^2 \right) - \left( \frac{1}{c_1^2 \eta} + \mathbf{a}^\top \mathbf{F}_0^\top \bar{\mathbf{R}}_0 \tilde{\mathbf{X}} \beta \right)^2}. \end{aligned}$$

Recall from the above argument that the denominator is  $\Theta_{\mathbb{P}}(1)$  and that  $\frac{1}{c_1^2 \eta} + \mathbf{a}^\top \mathbf{F}_0^\top \bar{\mathbf{R}}_0 \tilde{\mathbf{X}} \beta = o_{\mathbb{P}}(1)$ . Also,  $\tilde{\mathbf{y}}^\top \bar{\mathbf{R}}_0 \tilde{\mathbf{X}} \beta \mathbf{a}^\top \mathbf{F}_0^\top \bar{\mathbf{R}}_0 \tilde{\mathbf{y}} \leq \frac{1}{(\lambda n)^2} \|\tilde{\mathbf{y}}\|_2^2 \|\tilde{\mathbf{X}} \beta\|_2 \|\mathbf{a}\|_2 \|\mathbf{F}_0\|_{\text{op}} = O_{\mathbb{P}}(1)$ . Therefore, we find  $\delta_2 = \delta_3 = o_{\mathbb{P}}(1)$ .

**Term 4.** This term can be written as

$$\begin{aligned} \delta_4 &= \lambda T_{22} (\tilde{\mathbf{y}}^\top \bar{\mathbf{R}}_0 \tilde{\mathbf{X}} \beta)^2 \\ &= \frac{\lambda \left( \mathbf{a}^\top \mathbf{F}_0^\top \bar{\mathbf{R}}_0 \mathbf{F}_0 \mathbf{a} - \|\mathbf{a}\|_2^2 \right) (\tilde{\mathbf{y}}^\top \bar{\mathbf{R}}_0 \tilde{\mathbf{X}} \beta)^2}{\beta^\top \tilde{\mathbf{X}}^\top \bar{\mathbf{R}}_0 \tilde{\mathbf{X}} \beta \left( \mathbf{a}^\top \mathbf{F}_0^\top \bar{\mathbf{R}}_0 \mathbf{F}_0 \mathbf{a} - \|\mathbf{a}\|_2^2 \right) - \left( \frac{1}{c_1^2 \eta} + \mathbf{a}^\top \mathbf{F}_0^\top \bar{\mathbf{R}}_0 \tilde{\mathbf{X}} \beta \right)^2} = \lambda \frac{(\tilde{\mathbf{y}}^\top \bar{\mathbf{R}}_0 \tilde{\mathbf{X}} \beta)^2}{\beta^\top \tilde{\mathbf{X}}^\top \bar{\mathbf{R}}_0 \tilde{\mathbf{X}} \beta} + o_{\mathbb{P}}(1), \end{aligned}$$

since  $\frac{1}{c_1^2 \eta} + \mathbf{a}^\top \mathbf{F}_0^\top \bar{\mathbf{R}}_0 \tilde{\mathbf{X}} \beta = o_{\mathbb{P}}(1)$  and  $\mathbf{a}^\top \mathbf{F}_0^\top \bar{\mathbf{R}}_0 \mathbf{F}_0 \mathbf{a} - \|\mathbf{a}\|_2^2 = \Theta_{\mathbb{P}}(1) \neq 0$  by Lemma K.4. By equation 1 and Condition 2.4, we can write

$$\tilde{\mathbf{y}} = \sum_{p=1}^{\infty} c_{\star, p} H_p(\tilde{\mathbf{X}} \beta_{\star}) + \varepsilon,$$

where  $\varepsilon \in \mathbb{R}^n$  is additive Gaussian noise. Note that

$$\tilde{\mathbf{y}}^\top \bar{\mathbf{R}}_0 \tilde{\mathbf{X}} \beta = \sum_{p=1}^{\infty} c_{\star, p} H_p(\tilde{\mathbf{X}} \beta_{\star})^\top \bar{\mathbf{R}}_0 \tilde{\mathbf{X}} \beta + \varepsilon^\top \bar{\mathbf{R}}_0 \tilde{\mathbf{X}} \beta = c_{\star, 1} \beta_{\star}^\top \tilde{\mathbf{X}}^\top \bar{\mathbf{R}}_0 \tilde{\mathbf{X}} \beta + o_{\mathbb{P}}(1)$$

by Lemma K.7 and since  $\|\bar{\mathbf{R}}_0 \tilde{\mathbf{X}} \beta\|_2 = O_{\mathbb{P}}(1/\sqrt{n})$  and  $\varepsilon \perp \bar{\mathbf{R}}_0 \tilde{\mathbf{X}} \beta$ .

Further by Lemma K.1,

$$c_{\star, 1} \beta_{\star}^\top \tilde{\mathbf{X}}^\top \bar{\mathbf{R}}_0 \tilde{\mathbf{X}} \beta = c_{\star, 1}^2 \beta_{\star}^\top \tilde{\mathbf{X}}^\top \bar{\mathbf{R}}_0 \tilde{\mathbf{X}} \beta_{\star} + o_{\mathbb{P}}(1).$$

By summing up the four terms computed above and using Lemma K.4, we get

$$\mathcal{L}_{\text{tr}}(\mathbf{F}_0) - \mathcal{L}_{\text{tr}}(\mathbf{F}) \rightarrow_P \Delta_1 = \frac{\psi \lambda c_{\star, 1}^4 m_2}{\phi[c_{\star, 1}^2 + \phi(c_{\star}^2 + \sigma_{\varepsilon}^2)]} > 0, \quad (25)$$

which concludes the proof for  $\ell = 1$ .  $\square$

## K.2 PROOF FOR $\ell = 2$

In the  $\ell = 2$  regime, based on Theorem 4.1, we can replace  $\mathbf{F}$  with  $\mathbf{F}_2$  (defined in equation 3) to compute the training loss. Hence, from now on we let  $\mathbf{F} = \mathbf{F}_2$ . We can write  $\mathbf{F}\mathbf{F}^\top = \mathbf{F}_0\mathbf{F}_0^\top + \mathbf{U}\mathbf{K}\mathbf{U}^\top$  where  $\mathbf{U} = [\mathbf{F}_0 \mathbf{a} \mid \mathbf{F}_0 \mathbf{a}^{o2} \sqrt{N} \mid \tilde{\mathbf{X}} \beta \mid (\tilde{\mathbf{X}} \beta)^{o2}]$  and

$$\mathbf{K} = \begin{bmatrix} 0 & 0 & c_1^2 \eta & 0 \\ 0 & 0 & 0 & c_1^2 c_2 \eta^2 / \sqrt{N} \\ c_1^2 \eta & 0 & c_1^4 \eta^2 \|\mathbf{a}\|_2^2 & c_1^4 c_2 \eta^3 \langle \mathbf{a}, \mathbf{a}^{o2} \rangle \\ 0 & c_1^2 c_2 \eta^2 / \sqrt{N} & c_1^4 c_2 \eta^3 \langle \mathbf{a}^{o2}, \mathbf{a} \rangle & c_1^4 c_2^2 \eta^4 \langle \mathbf{a}^{o2}, \mathbf{a}^{o2} \rangle \end{bmatrix}.$$

Recalling  $\bar{\mathbf{R}} = (\mathbf{F}\mathbf{F}^\top + \lambda n \mathbf{I}_n)^{-1}$  and  $\bar{\mathbf{R}}_0 = (\mathbf{F}_0\mathbf{F}_0^\top + \lambda n \mathbf{I}_n)^{-1}$ , we still have equation 21. Defining  $\mathbf{T} = (\mathbf{K}^{-1} + \mathbf{U}^\top \bar{\mathbf{R}}_0 \mathbf{U})^{-1} \in \mathbb{R}^{4 \times 4}$ , we have the following analogue to equation 22:

$$\mathcal{L}_{\text{tr}}(\mathbf{F}_0) - \mathcal{L}_{\text{tr}}(\mathbf{F}) = \lambda \tilde{\mathbf{y}}^\top \bar{\mathbf{R}}_0 \mathbf{U} \mathbf{T} \mathbf{U}^\top \bar{\mathbf{R}}_0 \tilde{\mathbf{y}}. \quad (26)$$

Denoting in what follows  $\mathbf{Q} = \mathbf{F}_0^\top \bar{\mathbf{R}}_0 \mathbf{F}_0$ , the inverse  $\mathbf{T}^{-1}$  can be written as follows:

$$\begin{bmatrix} \mathbf{a}^\top \mathbf{Q} \mathbf{a} - \|\mathbf{a}\|_2^2 & N^{\frac{1}{2}} \mathbf{a}^\top (\mathbf{Q} - \mathbf{I}) \mathbf{a}^{\circ 2} & \mathbf{a}^\top \mathbf{F}_0^\top \bar{\mathbf{R}}_0 \tilde{\boldsymbol{\theta}} + \frac{1}{c_1^2 \eta} & \mathbf{a}^\top \mathbf{F}_0^\top \bar{\mathbf{R}}_0 \tilde{\boldsymbol{\theta}}^{\circ 2} \\ N^{\frac{1}{2}} \mathbf{a}^\top (\mathbf{Q} - \mathbf{I}) \mathbf{a}^{\circ 2} & N \mathbf{a}^{\circ 2 \top} \mathbf{Q} \mathbf{a}^{\circ 2} - N \|\mathbf{a}^{\circ 2}\|_2^2 & N^{\frac{1}{2}} \mathbf{a}^{\circ 2 \top} \mathbf{F}_0^\top \bar{\mathbf{R}}_0 \tilde{\boldsymbol{\theta}} & N^{\frac{1}{2}} \mathbf{a}^{\circ 2 \top} \mathbf{F}_0^\top \bar{\mathbf{R}}_0 \tilde{\boldsymbol{\theta}}^{\circ 2} + \frac{N^{\frac{1}{2}}}{c_1^2 c_2 \eta^2} \\ \tilde{\boldsymbol{\theta}}^\top \bar{\mathbf{R}}_0 \mathbf{F}_0 \mathbf{a} + \frac{1}{c_1^2 \eta} & N^{\frac{1}{2}} \tilde{\boldsymbol{\theta}}^\top \bar{\mathbf{R}}_0 \mathbf{F}_0 \mathbf{a}^{\circ 2} & \tilde{\boldsymbol{\theta}}^\top \bar{\mathbf{R}}_0 \tilde{\boldsymbol{\theta}} & \tilde{\boldsymbol{\theta}}^\top \bar{\mathbf{R}}_0 \tilde{\boldsymbol{\theta}}^{\circ 2} \\ \tilde{\boldsymbol{\theta}}^{\circ 2 \top} \bar{\mathbf{R}}_0 \mathbf{F}_0 \mathbf{a} & N^{\frac{1}{2}} \tilde{\boldsymbol{\theta}}^{\circ 2 \top} \bar{\mathbf{R}}_0 \mathbf{F}_0 \mathbf{a}^{\circ 2} + \frac{N^{\frac{1}{2}}}{c_1^2 c_2 \eta^2} & \tilde{\boldsymbol{\theta}}^{\circ 2 \top} \bar{\mathbf{R}}_0 \tilde{\boldsymbol{\theta}} & \tilde{\boldsymbol{\theta}}^{\circ 2 \top} \bar{\mathbf{R}}_0 \tilde{\boldsymbol{\theta}}^{\circ 2} \end{bmatrix}.$$

### K.2.1 ANALYSIS OF TERMS IN $\mathbf{T}^{-1}$ AND $\mathbf{T}$

In the following section, we will first analyze the elements of  $\mathbf{T}^{-1}$ :

**(1,1):** The term  $\mathbf{a}^\top \mathbf{Q} \mathbf{a} - \|\mathbf{a}\|_2^2$  has already been analyzed in Lemma K.4 and is  $\Theta_{\mathbb{P}}(1)$ .

**(1,2) and (2,1):** Recalling  $\mathbf{Q} = \mathbf{F}_0^\top \bar{\mathbf{R}}_0 \mathbf{F}_0$  and  $\mathbf{R}_0 = (\mathbf{F}_0^\top \mathbf{F}_0 + \lambda n \mathbf{I}_N)^{-1}$ , we can write

$$\begin{aligned} [\mathbf{T}^{-1}]_{1,2} &= [\mathbf{T}^{-1}]_{2,1} = \sqrt{N} \mathbf{a}^\top \mathbf{Q} \mathbf{a}^{\circ 2} - \sqrt{N} \langle \mathbf{a}, \mathbf{a}^{\circ 2} \rangle \\ &= -\lambda n \sqrt{N} \mathbf{a}^\top \mathbf{R}_0 \mathbf{a}^{\circ 2} = -\lambda n \sqrt{N} \mathbf{a}^\top \mathbf{R}_0 (\mathbf{a}^{\circ 2} - 1/N \mathbf{1}_N + 1/N \mathbf{1}_N). \end{aligned}$$

Introducing  $\tilde{\mathbf{a}} = \sqrt{N} \mathbf{a} \sim \mathcal{N}(0, \mathbf{I}_N)$ , and as  $H_2(x) = x^2 - 1$  for all  $x$ , we find

$$[\mathbf{T}^{-1}]_{1,2} = [\mathbf{T}^{-1}]_{2,1} = -\frac{\lambda n}{N} \tilde{\mathbf{a}}^\top \mathbf{R}_0 H_2(\tilde{\mathbf{a}}) - \frac{\lambda n}{\sqrt{N}} \mathbf{a}^\top \mathbf{R}_0 \mathbf{1}_N.$$

The second term converges to zero as  $n \rightarrow \infty$  because  $\mathbf{a} \sim \mathcal{N}(0, \frac{1}{N} \mathbf{I}_N)$  is independent of  $\mathbf{R}_0$ , and  $\|\frac{n}{\sqrt{N}} \mathbf{R}_0 \mathbf{1}_N\|_2 = O_{\mathbb{P}}(1)$ . Moreover, the first term also converges to zero; indeed,

$$\tilde{\mathbf{a}}^\top \mathbf{R}_0 H_2(\tilde{\mathbf{a}}) = \left( \frac{\tilde{\mathbf{a}}^\top + H_2(\tilde{\mathbf{a}})}{2} \right)^\top \mathbf{R}_0 \left( \frac{\tilde{\mathbf{a}}^\top + H_2(\tilde{\mathbf{a}})}{2} \right) - \left( \frac{\tilde{\mathbf{a}}^\top - H_2(\tilde{\mathbf{a}})}{2} \right)^\top \mathbf{R}_0 \left( \frac{\tilde{\mathbf{a}}^\top - H_2(\tilde{\mathbf{a}})}{2} \right).$$

Lemma K.3 can be used with  $\mathbf{D} = \mathbf{R}$  to prove the concentration of both term around their expectation. Note that the expectation of  $\tilde{\mathbf{a}}^\top \mathbf{R}_0 H_2(\tilde{\mathbf{a}})$  is zero because of the orthogonality property of Hermite polynomials and the independence of  $\tilde{\mathbf{a}}$  and  $\mathbf{R}_0$ . Putting everything together, we conclude that  $[\mathbf{T}^{-1}]_{1,2} = [\mathbf{T}^{-1}]_{2,1} = o_{\mathbb{P}}(1)$ .

**(1,3) and (3,1):** Recalling that  $\tilde{\boldsymbol{\theta}} = \tilde{\mathbf{X}} \boldsymbol{\beta}$ , it follows from equation 24 that this term is  $o_{\mathbb{P}}(1)$ .

**(1,4) and (4,1):** To bound  $\mathbf{a}^\top \mathbf{F}_0^\top \bar{\mathbf{R}}_0 \tilde{\boldsymbol{\theta}}^{\circ 2}$ , note that

$$\|\mathbf{F}_0^\top \bar{\mathbf{R}}_0 \tilde{\boldsymbol{\theta}}^{\circ 2}\|_{\text{op}} \leq \|\mathbf{F}_0\|_{\text{op}} \|\bar{\mathbf{R}}_0\|_{\text{op}} \|\tilde{\boldsymbol{\theta}}^{\circ 2}\|_2 = O_{\mathbb{P}}(1).$$

Hence, because  $\mathbf{a} \sim \mathcal{N}(0, \frac{1}{N} \mathbf{I}_N)$  is independent of  $\mathbf{F}_0^\top \bar{\mathbf{R}}_0 \tilde{\boldsymbol{\theta}}^{\circ 2}$ , we have

$$[\mathbf{T}^{-1}]_{1,4} = [\mathbf{T}^{-1}]_{4,1} = \mathbf{a}^\top \mathbf{F}_0^\top \bar{\mathbf{R}}_0 \tilde{\boldsymbol{\theta}}^{\circ 2} = o_{\mathbb{P}}(1).$$

**(2,2):** This term is  $O_{\mathbb{P}}(1)$ , because  $\mathbf{a} \sim \mathcal{N}(0, \frac{1}{N} \mathbf{I}_N)$ , so

$$\begin{aligned} [\mathbf{T}^{-1}]_{2,2} &= N \mathbf{a}^{\circ 2 \top} \mathbf{Q} \mathbf{a}^{\circ 2} - N \|\mathbf{a}^{\circ 2}\|_2^2 = -\lambda N n \mathbf{a}^{\circ 2 \top} (\mathbf{F}_0^\top \mathbf{F}_0 + \lambda n \mathbf{I}_N)^{-1} \mathbf{a}^{\circ 2} \\ &\leq \lambda N n \|\mathbf{a}^{\circ 2}\|_2^2 \cdot \|(\mathbf{F}_0^\top \mathbf{F}_0 + \lambda n \mathbf{I}_N)^{-1}\|_{\text{op}} = O_{\mathbb{P}}(1). \end{aligned}$$

**(2,3) and (3,2):** To bound  $\sqrt{N}\mathbf{a}^{\circ 2\top}\mathbf{F}_0^\top\bar{\mathbf{R}}_0\tilde{\boldsymbol{\theta}}$ , note that

$$\begin{aligned}\|\sqrt{N}\mathbf{a}^{\circ 2\top}\mathbf{F}_0^\top\bar{\mathbf{R}}_0\tilde{\mathbf{X}}\|_2 &\leq \|\sqrt{N}\mathbf{a}^{\circ 2}\|_2\|\mathbf{F}_0\|_{\text{op}}\|\bar{\mathbf{R}}_0\|_{\text{op}}\|\tilde{\mathbf{X}}\|_{\text{op}} \\ &\leq C\cdot\sqrt{N}\cdot\frac{1}{n}\cdot\sqrt{N}=O_{\mathbb{P}}(1).\end{aligned}$$

Also, by Lemma K.1, we have

$$[\mathbf{T}^{-1}]_{2,3}=[\mathbf{T}^{-1}]_{3,2}=\sqrt{N}\mathbf{a}^{\circ 2\top}\mathbf{F}_0^\top\bar{\mathbf{R}}_0\tilde{\mathbf{X}}\boldsymbol{\beta}=c_{\star,1}\sqrt{N}\mathbf{a}^{\circ 2\top}\mathbf{F}_0^\top\bar{\mathbf{R}}_0\tilde{\mathbf{X}}\boldsymbol{\beta}_\star+o_{\mathbb{P}}(1),$$

which converges to zero, because  $\boldsymbol{\beta}_\star\sim\mathcal{N}(0,\frac{1}{d}\mathbf{I}_d)$  and is independent of  $\sqrt{N}\mathbf{a}^{\circ 2\top}\mathbf{F}_0^\top\bar{\mathbf{R}}_0\tilde{\mathbf{X}}$ , which has bounded norm in probability.

**(2,4) and (4,2):** First note that in the regime where  $\ell=2$ , we have  $\frac{\sqrt{N}}{\eta^2}\rightarrow 0$ . Hence, we can write

$$\begin{aligned}[\mathbf{T}^{-1}]_{2,4}&=\sqrt{N}(\tilde{\mathbf{X}}\boldsymbol{\beta})^{\circ 2\top}\bar{\mathbf{R}}_0\mathbf{F}_0\mathbf{a}^{\circ 2}+o_{\mathbb{P}}(1) \\ &=\sqrt{N}H_2(\tilde{\mathbf{X}}\boldsymbol{\beta})^\top\bar{\mathbf{R}}_0\mathbf{F}_0\mathbf{a}^{\circ 2}+\sqrt{N}\mathbf{1}_n^\top\bar{\mathbf{R}}_0\mathbf{F}_0\mathbf{a}^{\circ 2}+o_{\mathbb{P}}(1).\end{aligned}\quad (27)$$

By Lemma K.6, the first term converges in probability to zero. Moreover,  $\mathbf{a}\sim\mathcal{N}(0,\frac{1}{N}\mathbf{I}_N)$  is independent of  $\bar{\mathbf{R}}_0\mathbf{F}_0$ , and  $\|\mathbf{1}_n^\top\bar{\mathbf{R}}_0\mathbf{F}_0\|_2=O_{\mathbb{P}}(1)$ . Thus, we have that  $\sqrt{N}\mathbf{1}_n^\top\bar{\mathbf{R}}_0\mathbf{F}_0(\mathbf{a}^{\circ 2}-1/N\mathbf{1}_N)\rightarrow_P 0$ . Hence, we find

$$[\mathbf{T}^{-1}]_{2,4}=\sqrt{N}\mathbf{1}_n^\top\bar{\mathbf{R}}_0\mathbf{F}_0\mathbf{1}_N/N+o_{\mathbb{P}}(1).$$

Based on Conjecture 4.3, we can replace  $\mathbf{F}_0$  with  $\mathbf{F}_0=c_1\tilde{\mathbf{X}}\mathbf{W}_0^\top+c_{>1}\mathbf{Z}$ , where  $\mathbf{Z}\in\mathbb{R}^{n\times d}$  is an independent random matrix with  $\mathcal{N}(0,1)$  entries, without changing the limit. Now, the linearized  $\mathbf{F}_0$  is left-orthogonally invariant, hence  $\mathbf{F}_0$  has the same distribution as  $\mathbf{O}\mathbf{F}_0$ , where  $\mathbf{O}$  is uniformly distributed over the Haar measure of  $d$ -dimensional orthogonal matrices, independently of all other randomness. Hence,

$$N^{-1/2}\mathbf{1}_n^\top\bar{\mathbf{R}}_0\mathbf{F}_0\mathbf{1}_N=_d N^{-1/2}\mathbf{1}_n^\top\mathbf{O}\bar{\mathbf{R}}_0\mathbf{F}_0\mathbf{1}_N.$$

Now,  $\mathbf{O}^\top\mathbf{1}_n=_d\sqrt{n}\mathbf{z}/\|\mathbf{z}\|_2$ , where  $\mathbf{z}\sim\mathcal{N}(0,\mathbf{I}_n)$ . Moreover  $\|\mathbf{z}\|_2=\sqrt{n}(1+o_{\mathbb{P}}(1))$ , hence replacing  $\mathbf{O}^\top\mathbf{1}_n$  with  $\mathbf{z}^\top$  introduces negligible error. Hence,

$$[\mathbf{T}^{-1}]_{2,4}=_d N^{-1/2}\mathbf{z}^\top\bar{\mathbf{R}}_0\mathbf{F}_0\mathbf{1}_N+o_{\mathbb{P}}(1).$$

Now,  $\mathbf{z}^\top\bar{\mathbf{R}}_0\mathbf{F}_0\mathbf{1}_N\sim\mathcal{N}(0,\|\bar{\mathbf{R}}_0\mathbf{F}_0\mathbf{1}_N\|_2^2)$ , and  $\|\bar{\mathbf{R}}_0\mathbf{F}_0\mathbf{1}_N\|_2=O_{\mathbb{P}}(1)$ , thus  $[\mathbf{T}^{-1}]_{2,4}\rightarrow_P 0$ .

**(3,3):** We have  $\|\tilde{\boldsymbol{\theta}}\|_2=O_{\mathbb{P}}(\sqrt{N})$  and  $\|\bar{\mathbf{R}}_0\|_{\text{op}}=O_{\mathbb{P}}(1/n)$ . Thus,  $[\mathbf{T}^{-1}]_{3,3}=O_{\mathbb{P}}(1)$ .

**(3,4) and (4,3):** First, note that defining  $\tilde{\boldsymbol{\beta}}=\frac{\boldsymbol{\beta}}{\|\boldsymbol{\beta}\|_2}$ , and as  $H_2(x)=x^2-1$  for all  $x$ , we can write

$$\begin{aligned}[\mathbf{T}^{-1}]_{3,4}=[\mathbf{T}^{-1}]_{4,3}&=\tilde{\boldsymbol{\theta}}^\top\bar{\mathbf{R}}_0\tilde{\boldsymbol{\theta}}^{\circ 2}=\|\boldsymbol{\beta}\|_2^3\left((\tilde{\mathbf{X}}\tilde{\boldsymbol{\beta}})^\top\bar{\mathbf{R}}_0(\tilde{\mathbf{X}}\tilde{\boldsymbol{\beta}})^{\circ 2}\right) \\ &=\|\boldsymbol{\beta}\|_2^3\left((\tilde{\mathbf{X}}\tilde{\boldsymbol{\beta}})^\top\bar{\mathbf{R}}_0H_2(\tilde{\mathbf{X}}\tilde{\boldsymbol{\beta}})\right)+\|\boldsymbol{\beta}\|_2^2\left(\tilde{\boldsymbol{\theta}}^\top\bar{\mathbf{R}}_0\mathbf{1}_N\right).\end{aligned}$$

Now, by Lemma K.1, we have

$$\tilde{\boldsymbol{\theta}}^\top\bar{\mathbf{R}}_0\mathbf{1}_N=c_{\star,1}\tilde{\boldsymbol{\theta}}_\star^\top\bar{\mathbf{R}}_0\mathbf{1}_N+o_{\mathbb{P}}(1).$$

Now, note that  $\|\tilde{\mathbf{X}}\bar{\mathbf{R}}_0\mathbf{1}_N\|_2=O_{\mathbb{P}}(1)$  and  $\boldsymbol{\beta}_\star\sim\mathcal{N}(0,\frac{1}{d}\mathbf{I}_d)$  is independent of  $\tilde{\mathbf{X}}\bar{\mathbf{R}}_0\mathbf{1}_N$ , which implies that the second term converges to zero. By using Lemma K.5 for  $\mathbf{u}=\tilde{\boldsymbol{\beta}}$ , the first term also converges to zero. Putting these together, we have  $[\mathbf{T}^{-1}]_{3,4}=[\mathbf{T}^{-1}]_{4,3}=o_{\mathbb{P}}(1)$ .

**(4,4):** We have  $\|\tilde{\boldsymbol{\theta}}^{\circ 2}\|_2=O_{\mathbb{P}}(\sqrt{N})$  and  $\|\bar{\mathbf{R}}_0\|_{\text{op}}=O_{\mathbb{P}}(1/n)$ . Thus,  $[\mathbf{T}^{-1}]_{4,4}=O_{\mathbb{P}}(1)$ .

Now, putting everything together, the matrix  $\mathbf{T}^{-1}$  can be written as

$$\mathbf{T}^{-1} = \begin{bmatrix} [\mathbf{T}^{-1}]_{1,1} & 0 & 0 & 0 \\ 0 & [\mathbf{T}^{-1}]_{2,2} & 0 & 0 \\ 0 & 0 & [\mathbf{T}^{-1}]_{3,3} & 0 \\ 0 & 0 & 0 & [\mathbf{T}^{-1}]_{4,4} \end{bmatrix} + \mathbf{\Delta}_1,$$

where the all elements of  $\mathbf{\Delta}_1$  are  $o_{\mathbb{P}}(1)$ . Thus the matrix  $\mathbf{T}$  is equal to

$$\mathbf{T} = \begin{bmatrix} \frac{1}{[\mathbf{T}^{-1}]_{1,1}} & 0 & 0 & 0 \\ 0 & \frac{1}{[\mathbf{T}^{-1}]_{2,2}} & 0 & 0 \\ 0 & 0 & \frac{1}{[\mathbf{T}^{-1}]_{3,3}} & 0 \\ 0 & 0 & 0 & \frac{1}{[\mathbf{T}^{-1}]_{4,4}} \end{bmatrix} + \mathbf{\Delta}_2, \quad (28)$$

where the all elements of  $\mathbf{\Delta}_2$  are  $o_{\mathbb{P}}(1)$ .

### K.2.2 COMPUTING THE TRAINING LOSS

Having computed the limit of the matrix  $\mathbf{T}^{-1}$  and  $\mathbf{T}$ , we are now ready to put everything together and compute the limiting train loss. One can write the outcome vector  $\tilde{\mathbf{y}}$  as  $\tilde{\mathbf{y}} = \sigma_*(\tilde{\mathbf{X}}\beta_*) + \varepsilon$ , where  $\varepsilon \in \mathbb{R}^n$  is the noise term. Thus, using equation 26, we find

$$\begin{aligned} \mathcal{L}_{\text{tr}}(\mathbf{F}_0) - \mathcal{L}_{\text{tr}}(\mathbf{F}) &= \lambda \sigma_*(\tilde{\mathbf{X}}\beta_*)^\top \bar{\mathbf{R}}_0 \mathbf{U} \mathbf{T} \mathbf{U}^\top \bar{\mathbf{R}}_0 \sigma_*(\tilde{\mathbf{X}}\beta_*) \\ &\quad + 2\lambda \sigma_*(\tilde{\mathbf{X}}\beta_*)^\top \bar{\mathbf{R}}_0 \mathbf{U} \mathbf{T} \mathbf{U}^\top \bar{\mathbf{R}}_0 \varepsilon + \lambda \varepsilon^\top \bar{\mathbf{R}}_0 \mathbf{U} \mathbf{T} \mathbf{U}^\top \bar{\mathbf{R}}_0 \varepsilon. \end{aligned} \quad (29)$$

We will first argue the second and third term will go to zero in probability. To do this, we note that  $\|\mathbf{T}\|_{\text{op}} = O_{\mathbb{P}}(1)$  and also  $\|\mathbf{U}^\top \bar{\mathbf{R}}_0\|_2 \leq \|\mathbf{U}\|_{\text{op}} \|\bar{\mathbf{R}}_0\|_{\text{op}} = O_{\mathbb{P}}(1/\sqrt{n})$ . We have  $\varepsilon \sim \mathbf{N}(0, \sigma_\varepsilon^2 \mathbf{I}_n)$  and it is independent of  $\bar{\mathbf{R}}_0$ ,  $\mathbf{U}$ ,  $\mathbf{T}$ ,  $\tilde{\mathbf{X}}$ , and  $\beta_*$ . Also note that  $\|\sigma_*(\tilde{\mathbf{X}}\beta_*)^\top \bar{\mathbf{R}}_0 \mathbf{U}\|_2 = O_{\mathbb{P}}(1)$ . Thus, the second and third term in equation 29 go to zero and we have

$$\mathcal{L}_{\text{tr}}(\mathbf{F}_0) - \mathcal{L}_{\text{tr}}(\mathbf{F}) = \lambda \sigma_*(\tilde{\mathbf{X}}\beta_*)^\top \bar{\mathbf{R}}_0 \mathbf{U} \mathbf{T} \mathbf{U}^\top \bar{\mathbf{R}}_0 \sigma_*(\tilde{\mathbf{X}}\beta_*) + o_{\mathbb{P}}(1).$$

If we expand  $\sigma_*(\tilde{\mathbf{X}}\beta_*)$  in the Hermite basis as  $\sigma_*(\tilde{\mathbf{X}}\beta_*) = \sum_{p=1}^{\infty} c_{*,p} H_p(\tilde{\theta}_*)$ , we can write

$$\mathcal{L}_{\text{tr}}(\mathbf{F}_0) - \mathcal{L}_{\text{tr}}(\mathbf{F}) = \lambda \sum_{p,q=1}^{\infty} c_{*,p} c_{*,q} H_p(\tilde{\theta}_*)^\top \bar{\mathbf{R}}_0 \mathbf{U} \mathbf{T} \mathbf{U}^\top \bar{\mathbf{R}}_0 H_q(\tilde{\theta}_*) + o_{\mathbb{P}}(1).$$

We define  $\Delta_{p,q} = H_p(\tilde{\theta}_*)^\top \bar{\mathbf{R}}_0 \mathbf{U} \mathbf{T} \mathbf{U}^\top \bar{\mathbf{R}}_0 H_q(\tilde{\theta}_*) = \delta_1^{p,q} + \delta_2^{p,q} + \delta_3^{p,q} + \delta_4^{p,q}$  in which, with  $T_{i,j}$  being the  $(i, j)$ -th elements of the matrix  $\mathbf{T}$ ,

$$\begin{aligned} \delta_1^{p,q} &= T_{1,1} H_p(\tilde{\theta}_*)^\top \bar{\mathbf{R}}_0 (\mathbf{F}_0 \mathbf{a}) (\mathbf{F}_0 \mathbf{a})^\top \bar{\mathbf{R}}_0 H_q(\tilde{\theta}_*) \\ &\quad + T_{1,2} H_p(\tilde{\theta}_*)^\top \bar{\mathbf{R}}_0 (\mathbf{F}_0 \mathbf{a}) (\sqrt{N} \mathbf{F}_0 \mathbf{a}^{\circ 2})^\top \bar{\mathbf{R}}_0 H_q(\tilde{\theta}_*) \\ &\quad + T_{1,3} H_p(\tilde{\theta}_*)^\top \bar{\mathbf{R}}_0 (\mathbf{F}_0 \mathbf{a}) \tilde{\theta}^\top \bar{\mathbf{R}}_0 H_q(\tilde{\theta}_*) \\ &\quad + T_{1,4} H_p(\tilde{\theta}_*)^\top \bar{\mathbf{R}}_0 (\mathbf{F}_0 \mathbf{a}) \tilde{\theta}^{\circ 2 \top} \bar{\mathbf{R}}_0 H_q(\tilde{\theta}_*), \end{aligned} \quad (30)$$

$$\begin{aligned}
\delta_2^{p,q} &= T_{2,1} H_p(\tilde{\boldsymbol{\theta}}_\star)^\top \bar{\mathbf{R}}_0 (\sqrt{N} \mathbf{F}_0 \mathbf{a}^{\circ 2}) (\mathbf{F}_0 \mathbf{a})^\top \bar{\mathbf{R}}_0 H_q(\tilde{\boldsymbol{\theta}}_\star) \\
&\quad + T_{2,2} H_p(\tilde{\boldsymbol{\theta}}_\star)^\top \bar{\mathbf{R}}_0 (\sqrt{N} \mathbf{F}_0 \mathbf{a}^{\circ 2}) (\sqrt{N} \mathbf{F}_0 \mathbf{a}^{\circ 2})^\top \bar{\mathbf{R}}_0 H_q(\tilde{\boldsymbol{\theta}}_\star) \\
&\quad + T_{2,3} H_p(\tilde{\boldsymbol{\theta}}_\star)^\top \bar{\mathbf{R}}_0 (\sqrt{N} \mathbf{F}_0 \mathbf{a}^{\circ 2}) \tilde{\boldsymbol{\theta}}^\top \bar{\mathbf{R}}_0 H_q(\tilde{\boldsymbol{\theta}}_\star) \\
&\quad + T_{2,4} H_p(\tilde{\boldsymbol{\theta}}_\star)^\top \bar{\mathbf{R}}_0 (\sqrt{N} \mathbf{F}_0 \mathbf{a}^{\circ 2}) \tilde{\boldsymbol{\theta}}^{\circ 2 \top} \bar{\mathbf{R}}_0 H_q(\tilde{\boldsymbol{\theta}}_\star), \tag{31}
\end{aligned}$$

$$\begin{aligned}
\delta_3^{p,q} &= T_{3,1} H_p(\tilde{\boldsymbol{\theta}}_\star)^\top \bar{\mathbf{R}}_0 \tilde{\boldsymbol{\theta}} (\mathbf{F}_0 \mathbf{a})^\top \bar{\mathbf{R}}_0 H_q(\tilde{\boldsymbol{\theta}}_\star) \\
&\quad + T_{3,2} H_p(\tilde{\boldsymbol{\theta}}_\star)^\top \bar{\mathbf{R}}_0 \tilde{\boldsymbol{\theta}} (\sqrt{N} \mathbf{F}_0 \mathbf{a}^{\circ 2})^\top \bar{\mathbf{R}}_0 H_q(\tilde{\boldsymbol{\theta}}_\star) \\
&\quad + T_{3,3} H_p(\tilde{\boldsymbol{\theta}}_\star)^\top \bar{\mathbf{R}}_0 \tilde{\boldsymbol{\theta}} \tilde{\boldsymbol{\theta}}^\top \bar{\mathbf{R}}_0 H_q(\tilde{\boldsymbol{\theta}}_\star) \\
&\quad + T_{3,4} H_p(\tilde{\boldsymbol{\theta}}_\star)^\top \bar{\mathbf{R}}_0 \tilde{\boldsymbol{\theta}} \tilde{\boldsymbol{\theta}}^{\circ 2 \top} \bar{\mathbf{R}}_0 H_q(\tilde{\boldsymbol{\theta}}_\star), \tag{32}
\end{aligned}$$

and

$$\begin{aligned}
\delta_4^{p,q} &= T_{4,1} H_p(\tilde{\boldsymbol{\theta}}_\star)^\top \bar{\mathbf{R}}_0 \tilde{\boldsymbol{\theta}}^{\circ 2} (\mathbf{F}_0 \mathbf{a})^\top \bar{\mathbf{R}}_0 H_q(\tilde{\boldsymbol{\theta}}_\star) \\
&\quad + T_{4,2} H_p(\tilde{\boldsymbol{\theta}}_\star)^\top \bar{\mathbf{R}}_0 \tilde{\boldsymbol{\theta}}^{\circ 2} (\sqrt{N} \mathbf{F}_0 \mathbf{a}^{\circ 2})^\top \bar{\mathbf{R}}_0 H_q(\tilde{\boldsymbol{\theta}}_\star) \\
&\quad + T_{4,3} H_p(\tilde{\boldsymbol{\theta}}_\star)^\top \bar{\mathbf{R}}_0 \tilde{\boldsymbol{\theta}}^{\circ 2} \tilde{\boldsymbol{\theta}}^\top \bar{\mathbf{R}}_0 H_q(\tilde{\boldsymbol{\theta}}_\star) \\
&\quad + T_{4,4} H_p(\tilde{\boldsymbol{\theta}}_\star)^\top \bar{\mathbf{R}}_0 \tilde{\boldsymbol{\theta}}^{\circ 2} \tilde{\boldsymbol{\theta}}^{\circ 2 \top} \bar{\mathbf{R}}_0 H_q(\tilde{\boldsymbol{\theta}}_\star). \tag{33}
\end{aligned}$$

We will now look at each  $\delta_i^{p,q}$  for  $i \in \{1, 2, 3, 4\}$ .

**Term  $\delta_1^{p,q}$ :** To prove that the term in equation 30 are asymptotically negligible, note that  $\mathbf{a} \sim \mathcal{N}(0, \frac{1}{N} \mathbf{I}_N)$  is independent of  $H_p(\tilde{\boldsymbol{\theta}}_\star) \bar{\mathbf{R}}_0 \mathbf{F}_0$  and we have  $\|H_p(\tilde{\boldsymbol{\theta}}_\star) \bar{\mathbf{R}}_0 \mathbf{F}_0\|_2 = O_{\mathbb{P}}(1)$ . Thus,  $H_p(\tilde{\boldsymbol{\theta}}_\star) \bar{\mathbf{R}}_0 \mathbf{F}_0 \mathbf{a} = o_{\mathbb{P}}(1)$  and all other terms multiplying this are  $O_{\mathbb{P}}(1)$ . This implies that for any  $p, q \in \mathbb{N}$ , we have  $\delta_1^{p,q} = o_{\mathbb{P}}(1)$ .

**Term  $\delta_2^{p,q}$ :** All four terms in equation 31 converge to zero. To prove this, we will use the Lemma K.6. In equation 31, all terms multiplied by  $\sqrt{N} H_p(\tilde{\boldsymbol{\theta}}_\star) \bar{\mathbf{R}}_0 \mathbf{F}_0 \mathbf{a}^{\circ 2}$  are  $O_{\mathbb{P}}(1)$ . Thus,  $\delta_2^{p,q} = o_{\mathbb{P}}(1)$  for any  $p, q \in \mathbb{N}$ .

**Term  $\delta_3^{p,q}$ :** The first term in equation 32 converges to zero in probability due to an argument similar to the arguments used for  $\delta_1^{p,q}$ ; and the same holds for the second term in equation 32, by arguing similarly as for  $\delta_2^{p,q}$ . We have shown that  $T_{3,4} = o_{\mathbb{P}}(1)$ , and by a norm argument, we can see that  $H_p(\tilde{\boldsymbol{\theta}}_\star)^\top \bar{\mathbf{R}}_0 \tilde{\boldsymbol{\theta}}$  and  $\tilde{\boldsymbol{\theta}}^{\circ 2 \top} \bar{\mathbf{R}}_0 H_q(\tilde{\boldsymbol{\theta}}_\star)$  are  $O_{\mathbb{P}}(1)$ . Hence,

$$\delta_3^{p,q} = T_{3,3} (H_p(\tilde{\boldsymbol{\theta}}_\star)^\top \bar{\mathbf{R}}_0 \tilde{\boldsymbol{\theta}}) (\tilde{\boldsymbol{\theta}}^\top \bar{\mathbf{R}}_0 H_q(\tilde{\boldsymbol{\theta}}_\star)) + o_{\mathbb{P}}(1).$$

**Term  $\delta_4^{p,q}$ :** The first two terms in equation 33 converge to zero by the same reasoning used for  $\delta_1^{p,q}$  and  $\delta_2^{p,q}$ , respectively. The third term can also be shown to converge to zero by recalling that  $T_{4,3} = o_{\mathbb{P}}(1)$ . Hence, we can write

$$\delta_4^{p,q} = T_{4,4} (H_p(\tilde{\boldsymbol{\theta}}_\star)^\top \bar{\mathbf{R}}_0 \tilde{\boldsymbol{\theta}}^{\circ 2}) (\tilde{\boldsymbol{\theta}}^{\circ 2 \top} \bar{\mathbf{R}}_0 H_q(\tilde{\boldsymbol{\theta}}_\star)) + o_{\mathbb{P}}(1).$$

Putting everything together, we find

$$\begin{aligned}
L_{\text{tr}}(\mathbf{F}_0) - L_{\text{tr}}(\mathbf{F}) &= \lambda T_{3,3} \sum_{p,q=1}^{\infty} c_{\star,p} c_{\star,q} (H_p(\tilde{\boldsymbol{\theta}}_\star)^\top \bar{\mathbf{R}}_0 \tilde{\boldsymbol{\theta}}) (\tilde{\boldsymbol{\theta}}^\top \bar{\mathbf{R}}_0 H_q(\tilde{\boldsymbol{\theta}}_\star)) \\
&\quad + \lambda T_{4,4} \sum_{p,q=1}^{\infty} c_{\star,p} c_{\star,q} (H_p(\tilde{\boldsymbol{\theta}}_\star)^\top \bar{\mathbf{R}}_0 \tilde{\boldsymbol{\theta}}^{\circ 2}) (\tilde{\boldsymbol{\theta}}^{\circ 2 \top} \bar{\mathbf{R}}_0 H_q(\tilde{\boldsymbol{\theta}}_\star)) + o_{\mathbb{P}}(1).
\end{aligned}$$

Using Lemma K.7, we know that in the sums above, the terms corresponding to  $(p, q) = (1, 1)$  and  $(p, q) = (2, 2)$  are the only non-negligible terms in the first and second sum respectively.

Hence, as  $T_{3,3} = 1/(\tilde{\boldsymbol{\theta}}^\top \bar{\mathbf{R}}_0 \tilde{\boldsymbol{\theta}}) + o_{\mathbb{P}}(1)$  and  $T_{4,4} = 1/(\tilde{\boldsymbol{\theta}}^{\circ 2 \top} \bar{\mathbf{R}}_0 \tilde{\boldsymbol{\theta}}^{\circ 2}) + o_{\mathbb{P}}(1)$ , from Lemmas K.1, K.4, K.7 and K.8, we can write,

$$\begin{aligned} \mathcal{L}_{\text{tr}}(\mathbf{F}) - \mathcal{L}_{\text{tr}}(\mathbf{F}_0) &= \lambda T_{3,3} c_{\star,1}^2 (\tilde{\boldsymbol{\theta}}^\top \bar{\mathbf{R}}_0 \tilde{\boldsymbol{\theta}})^2 + \lambda T_{4,4} c_{\star,2}^2 (H_2(\tilde{\boldsymbol{\theta}}_\star)^\top \bar{\mathbf{R}}_0 \tilde{\boldsymbol{\theta}}^{\circ 2})^2 + o_{\mathbb{P}}(1) \\ &= \lambda \frac{c_{\star,1}^2 (\tilde{\boldsymbol{\theta}}^\top \bar{\mathbf{R}}_0 \tilde{\boldsymbol{\theta}})^2}{\tilde{\boldsymbol{\theta}}^\top \bar{\mathbf{R}}_0 \tilde{\boldsymbol{\theta}}} + \lambda c_{\star,2}^2 \frac{(H_2(\tilde{\boldsymbol{\theta}}_\star)^\top \bar{\mathbf{R}}_0 \tilde{\boldsymbol{\theta}}^{\circ 2})^2}{\tilde{\boldsymbol{\theta}}^{\circ 2 \top} \bar{\mathbf{R}}_0 \tilde{\boldsymbol{\theta}}^{\circ 2}} + o_{\mathbb{P}}(1) \\ &\rightarrow_P \Delta_2 = \frac{\psi \lambda c_{\star,1}^4 m_2}{\phi [c_{\star,1}^2 + \phi(c_\star^2 + \sigma_\varepsilon^2)]} + \frac{4\psi \lambda c_{\star,1}^4 c_{\star,2}^2 m_1}{3\phi [\phi(c_\star^2 + \sigma_\varepsilon^2) + c_{\star,1}^2]^2}, \end{aligned}$$

proving the theorem for  $\ell = 2$ .

## L ASYMPTOTICS OF THE TRAINING LOSS FOR GENERAL $\ell$

We define the values  $\xi_{i,j}$  for all  $i, j \in \{0, 1, \dots\}$  such that for any  $p \in \mathbb{N}$  and  $x \in \mathbb{R}$ , we have  $x^p = \sum_{i=0}^p \xi_{p,i} H_i(x)$ .

**Theorem L.1.** *Let  $\ell \in \mathbb{N}$ . If Conditions 2.1-2.4 and the Gaussian equivalence conjecture 4.3 hold, while we also have  $c_1, \dots, c_\ell \neq 0$ , and  $\eta \asymp n^\alpha$  with  $\frac{\ell-1}{2\ell} < \alpha < \frac{\ell}{2\ell+2}$ , then for the learned feature map  $\mathbf{F}$  and the untrained feature map  $\mathbf{F}_0$ , we have  $\mathcal{L}_{\text{tr}}(\mathbf{F}_0) - \mathcal{L}_{\text{tr}}(\mathbf{F}) \rightarrow_P \Delta_\ell > 0$ , where*

$$\Delta_\ell = \lambda \sum_{p=1}^{\ell} \sum_{q=1}^{\ell} c_{\star,p} c_{\star,q} r_p r_q \sum_{i=1}^{\ell} \sum_{j=1}^{\ell} \Omega_{i,j} (\phi(c_\star^2 + \sigma_\varepsilon^2) + c_{\star,1}^2)^{(i+j)/2} \xi_{i,p} \xi_{j,q} + o_{\mathbb{P}}(1),$$

in which  $\Omega$  is an invertible matrix with

$$[\Omega^{-1}]_{i,j} = (c_{\star,1}^2 + \phi(c_\star^2 + \sigma_\varepsilon^2))^{(i+j)/2} \frac{\psi}{\phi} \left[ m_2 \xi_{i,1} \xi_{j,1} + m_1 \sum_{k=0, k \neq 1}^{\min(i,j)} k! \xi_{i,k} \xi_{j,k} \right], \quad \forall i, j \in [\ell],$$

and for  $p \in \mathbb{N}$ ,

$$r_p = \begin{cases} \frac{p! \psi m_1}{\phi} \left( \frac{c_{\star,1}}{\sqrt{\phi(c_\star^2 + \sigma_\varepsilon^2) + c_{\star,1}^2}} \right)^p & p \neq 1 \\ \frac{\psi m_2}{\phi} \frac{c_{\star,1}}{\sqrt{\phi(c_\star^2 + \sigma_\varepsilon^2) + c_{\star,1}^2}} & p = 1 \end{cases}$$

*Proof of Theorem L.1.* In the regime where  $\eta \asymp n^\alpha$  with  $\frac{\ell-1}{2\ell} < \alpha < \frac{\ell}{2\ell+2}$ , according to the equivalence theorem 4.1, we can replace  $\mathbf{F}$  with  $\mathbf{F}_\ell$  when computing the limiting training loss. To compute the limiting training loss difference according to lemma K.2, we study the matrix  $\bar{\mathbf{R}} = (\mathbf{F}\mathbf{F}^\top + \lambda n \mathbf{I}_n)^{-1}$ . Due to equation 3, we can write

$$\begin{aligned} \mathbf{F}\mathbf{F}^\top &= \mathbf{F}_0 \mathbf{F}_0^\top + \sum_{k=1}^{\ell} c_1^k c_k \eta^k \tilde{\boldsymbol{\theta}}^{\circ k} (\mathbf{F}_0 \mathbf{a}^{\circ k})^\top \\ &\quad + \sum_{k=1}^{\ell} c_1^k c_k \eta^k (\mathbf{F}_0 \mathbf{a}^{\circ k}) \tilde{\boldsymbol{\theta}}^{\circ k \top} + \sum_{j=1}^{\ell} \sum_{i=1}^{\ell} c_1^{i+j} c_i c_j \eta^{i+j} (\mathbf{a}^{\circ i})^\top (\mathbf{a}^{\circ j}) \tilde{\boldsymbol{\theta}}^{\circ i} \tilde{\boldsymbol{\theta}}^{\circ j \top}. \end{aligned}$$

Defining the matrix  $\mathbf{U}$  as

$$\mathbf{U} = \left[ \underbrace{\mathbf{F}_0 \mathbf{a} \mid \dots \mid N^{(\ell-1)/2} \mathbf{F}_0 \mathbf{a}^{\circ \ell}}_{\ell \text{ columns}} \mid \underbrace{\tilde{\boldsymbol{\theta}} \mid \dots \mid \tilde{\boldsymbol{\theta}}^{\circ \ell}}_{\ell \text{ columns}} \right] \in \mathbb{R}^{n \times 2\ell},$$

we can write

$$\mathbf{F}\mathbf{F}^\top = \mathbf{F}_0 \mathbf{F}_0^\top + \mathbf{U} \mathbf{K} \mathbf{U}^\top, \text{ in which } \mathbf{K} = \begin{bmatrix} \mathbf{0}_{\ell \times \ell} & \mathbf{K}_o \\ \mathbf{K}_o & \tilde{\mathbf{K}} \end{bmatrix} \in \mathbb{R}^{2\ell \times 2\ell},$$



where  $\mathbf{K}_o = \text{diag}\left(\frac{c_1 c_1 \eta}{N^0}, \dots, \frac{c_1^\ell c_\ell \eta^\ell}{N^{(\ell-1)/2}}\right) \in \mathbb{R}^{\ell \times \ell}$ , and  $\tilde{\mathbf{K}} \in \mathbb{R}^{\ell \times \ell}$  with  $[\tilde{\mathbf{K}}]_{i,j} = c_1^{i+j} c_i c_j \eta^{i+j} \langle \mathbf{a}^{oi}, \mathbf{a}^{oj} \rangle$ , for all  $i, j \in [\ell]$ .

Using the Woodbury formula, the matrix  $\bar{\mathbf{R}}$  can be written in terms of  $\bar{\mathbf{R}}_0 = (\mathbf{F}_0 \mathbf{F}_0^\top + \lambda n \mathbf{I}_n)^{-1}$  and  $\mathbf{T} = (\mathbf{K}^{-1} + \mathbf{U}^\top \bar{\mathbf{R}}_0 \mathbf{U})^{-1} \in \mathbb{R}^{2\ell \times 2\ell}$  as  $\bar{\mathbf{R}} = \bar{\mathbf{R}}_0 - \bar{\mathbf{R}}_0 \mathbf{U} \mathbf{T} \mathbf{U}^\top \bar{\mathbf{R}}_0$ . Now

$$\mathbf{K}^{-1} = \begin{bmatrix} \hat{\mathbf{K}} & \mathbf{K}_o^{-1} \\ \mathbf{K}_o^{-1} & \mathbf{0}_{\ell \times \ell} \end{bmatrix}, \text{ where } \mathbf{K}_o^{-1} = \text{diag}\left(\frac{N^0}{c_1 c_1 \eta}, \dots, \frac{N^{\frac{\ell-1}{2}}}{c_1^\ell c_\ell \eta^\ell}\right),$$

and  $[\hat{\mathbf{K}}]_{i,j} = -N^{(i-1)/2} N^{(j-1)/2} \langle \mathbf{a}^{oi}, \mathbf{a}^{oj} \rangle$ , for all  $i, j \in [\ell]$ . We define  $\mathbf{M}_1, \mathbf{M}_2, \mathbf{M}_o \in \mathbb{R}^{\ell \times \ell}$  as the following blocks of  $\mathbf{T}^{-1}$ :

$$\mathbf{T}^{-1} = \begin{bmatrix} \mathbf{M}_1 & \mathbf{M}_o \\ \mathbf{M}_o & \mathbf{M}_2 \end{bmatrix}.$$

Hence, we have

$$\begin{cases} [\mathbf{M}_1]_{i,j} = N^{(i-1)/2} N^{(j-1)/2} \mathbf{a}^{oi\top} (\mathbf{F}_0^\top \bar{\mathbf{R}}_0 \mathbf{F}_0 - \mathbf{I}) \mathbf{a}^{oj}, \\ [\mathbf{M}_o]_{i,j} = N^{(i-1)/2} \mathbf{a}^{oi\top} \mathbf{F}_0^\top \bar{\mathbf{R}}_0 \tilde{\boldsymbol{\theta}}^{oj} + o_{\mathbb{P}}(1), \\ [\mathbf{M}_2]_{i,j} = \tilde{\boldsymbol{\theta}}^{oi\top} \bar{\mathbf{R}}_0 \tilde{\boldsymbol{\theta}}^{oj}. \end{cases}$$

We can expand the monomials in terms of the Hermite polynomials, for scalars  $\xi_{i,k}$ ,  $k \in [i]$ , as follows:

$$(N^{1/2} \mathbf{a})^{oi} = \sum_{k=0}^i \xi_{i,k} H_k(N^{1/2} \mathbf{a}), \quad \text{and} \quad (\tilde{\mathbf{X}} \boldsymbol{\beta})^{oi} = \|\boldsymbol{\beta}\|_2^i \sum_{k=0}^i \xi_{i,k} H_k(\tilde{\mathbf{X}} \boldsymbol{\beta} / \|\boldsymbol{\beta}\|_2).$$

Using these, we will analyze each matrix  $\mathbf{M}_1, \mathbf{M}_2, \mathbf{M}_o$  separately.

**Analysis of  $\mathbf{M}_1$ .** It is easily seen that the elements of this matrix are  $O_{\mathbb{P}}(1)$ .

**Analysis of  $\mathbf{M}_2$ .** To analyze these terms, we need the following lemma, whose proof is deferred to Section N.10.

**Lemma L.2.** For any  $i, j \in \mathbb{N}_0$ , we have

$$(\tilde{\mathbf{X}} \boldsymbol{\beta})^{oi\top} \bar{\mathbf{R}}_0 (\tilde{\mathbf{X}} \boldsymbol{\beta})^{oj} \rightarrow_P (c_{\star,1}^2 + \phi(c_{\star}^2 + \sigma_\varepsilon^2))^{(i+j)/2} \left[ \xi_{i,1} \xi_{j,1} \frac{\psi m_2}{\phi} + \frac{\psi m_1}{\phi} \sum_{k=0, k \neq 1}^{\min(i,j)} k! \xi_{i,k} \xi_{j,k} \right].$$

Defining the matrix  $\bar{\mathbf{M}}_2 \in \mathbb{R}^{\ell \times \ell}$  with entries

$$[\bar{\mathbf{M}}_2]_{i,j} = (c_{\star,1}^2 + \phi(c_{\star}^2 + \sigma_\varepsilon^2))^{(i+j)/2} \left[ \xi_{i,1} \xi_{j,1} \frac{\psi m_2}{\phi} + \frac{\psi m_1}{\phi} \sum_{k=0, k \neq 1}^{\min(i,j)} k! \xi_{i,k} \xi_{j,k} \right],$$

for all  $i, j \in [\ell]$ , we have  $[\mathbf{M}_2]_{i,j} \rightarrow_P [\bar{\mathbf{M}}_2]_{i,j}$ . Note that we can write

$$\bar{\mathbf{M}}_2 = \frac{\psi}{\phi} \mathbf{B} \mathbf{Z} \mathbf{M} \mathbf{Z}^\top \mathbf{B} + \frac{\psi m_1}{\phi} \mathbf{e} \mathbf{e}^\top,$$

where we define  $b = (c_{\star,1}^2 + \phi(c_{\star}^2 + \sigma_\varepsilon^2))^{1/2}$ ,  $\mathbf{B} = \text{diag}(b^1, \dots, b^\ell) \in \mathbb{R}^{\ell \times \ell}$ ,  $\mathbf{e} = \mathbf{B}[\xi_{1,0}, \dots, \xi_{\ell,0}]^\top$ ,

$$\mathbf{M} = \begin{bmatrix} 1! m_2 & 0 & \cdots & 0 \\ 0 & 2! m_1 & \cdots & 0 \\ \vdots & \vdots & \ddots & \vdots \\ 0 & 0 & \cdots & \ell! m_1 \end{bmatrix} \in \mathbb{R}^{\ell \times \ell}, \text{ and } \mathbf{Z} = \begin{bmatrix} \xi_{1,1} & \cdots & \xi_{1,\ell} \\ \vdots & \ddots & \vdots \\ \xi_{\ell,1} & \cdots & \xi_{\ell,\ell} \end{bmatrix} \in \mathbb{R}^{\ell \times \ell}.$$

Recalling that for all  $i, j \in \{0, 1, \dots\}$ ,  $\xi_{i,j}$  are such that for any  $p \in \mathbb{N}$  and  $x \in \mathbb{R}$ , we have  $x^p = \sum_{i=0}^p \xi_{p,i} H_i(x)$ , it follows that the matrix  $\mathbf{Z}$  is lower-triangular with unit diagonal; hence invertible. Thus, since  $\mathbf{B}, \mathbf{M}$  are diagonal with positive entries, the matrix  $\mathbf{B} \mathbf{Z} \mathbf{M} \mathbf{Z}^\top \mathbf{B}$  is positive definite. This implies that  $\bar{\mathbf{M}}_2$  is invertible. We will denote  $\boldsymbol{\Omega} = \bar{\mathbf{M}}_2^{-1}$ .

**Analysis of  $\mathbf{M}_o$ .** We analyze  $[\mathbf{M}_o]_{i,j}$  by writing  $N^{(i-1)/2}\mathbf{a}^{\circ i}$  in the Hermite basis, finding

$$[\mathbf{M}_o]_{i,j} = \sum_{k=0}^i \frac{\xi_{i,k}}{\sqrt{N}} H_k(N^{1/2}\mathbf{a})^\top \mathbf{F}_0^\top \bar{\mathbf{R}}_0 \tilde{\boldsymbol{\theta}}^{\circ j} + o_{\mathbb{P}}(1).$$

The terms with  $k > 0$  are all  $o_{\mathbb{P}}(1)$  because  $\frac{H_k(N^{1/2}\mathbf{a})}{\sqrt{N}}$  is a norm  $O_{\mathbb{P}}(1)$  vector with mean zero, independent from the vector  $\mathbf{F}_0^\top \bar{\mathbf{R}}_0 \tilde{\boldsymbol{\theta}}^{\circ j}$  with norm  $O_{\mathbb{P}}(1)$ . Thus,  $[\mathbf{M}_o]_{i,j} = o_{\mathbb{P}}(1)$ . The term with  $k = 0$  can also be shown to be  $o_{\mathbb{P}}(1)$  by using the fact that the linearized  $\mathbf{F}_0$  is left-orthogonally invariant, via an argument identical to the one used to analyze equation 27.

Hence, putting these together, the matrix  $\mathbf{T}$  can be written as

$$\mathbf{T} = \begin{bmatrix} \mathbf{M}_1^{-1} & \mathbf{0}_{\ell \times \ell} \\ \mathbf{0}_{\ell \times \ell} & \mathbf{M}_2^{-1} \end{bmatrix} + o_{\mathbb{P}}(1).$$

Using lemma K.2, we can write the training loss difference as  $\mathcal{L}_{\text{tr}}(\mathbf{F}_0) - \mathcal{L}_{\text{tr}}(\mathbf{F}) = \lambda \mathbf{y}^\top \bar{\mathbf{R}}_0 \mathbf{U} \mathbf{T} \mathbf{U}^\top \bar{\mathbf{R}}_0 \mathbf{y}$ . Plugging in the teacher function  $f_*$ , we find

$$\begin{aligned} \mathcal{L}_{\text{tr}}(\mathbf{F}_0) - \mathcal{L}_{\text{tr}}(\mathbf{F}) &= \sum_{p,q} \lambda c_{*,p} c_{*,q} H_p(\tilde{\boldsymbol{\theta}}_*)^\top \bar{\mathbf{R}}_0 \mathbf{U} \mathbf{T} \mathbf{U}^\top \bar{\mathbf{R}}_0 H_q(\tilde{\boldsymbol{\theta}}_*) \\ &\quad + 2\lambda \sum_p \left( c_{*,p} H_p(\tilde{\boldsymbol{\theta}}_*)^\top \bar{\mathbf{R}}_0 \mathbf{U} \mathbf{T} \mathbf{U}^\top \bar{\mathbf{R}}_0 \boldsymbol{\varepsilon} \right) + \lambda \boldsymbol{\varepsilon}^\top \bar{\mathbf{R}}_0 \mathbf{U} \mathbf{T} \mathbf{U}^\top \bar{\mathbf{R}}_0 \boldsymbol{\varepsilon}. \end{aligned}$$

Note that the second term can be shown to be  $o_{\mathbb{P}}(1)$  because  $\boldsymbol{\varepsilon} \sim \mathcal{N}(0, \sigma_\varepsilon^2 \mathbf{I}_n)$  and it is independent from  $H_p(\tilde{\boldsymbol{\theta}}_*)^\top \bar{\mathbf{R}}_0 \mathbf{U} \mathbf{T} \mathbf{U}^\top \bar{\mathbf{R}}_0$ , and  $\|H_p(\tilde{\boldsymbol{\theta}}_*)^\top \bar{\mathbf{R}}_0 \mathbf{U} \mathbf{T} \mathbf{U}^\top \bar{\mathbf{R}}_0\|_{\text{op}} = O_{\mathbb{P}}(1/\sqrt{N})$  with a simple order-wise analysis. The third can also be shown to be  $o_{\mathbb{P}}(1)$  by noting that  $\boldsymbol{\varepsilon}$  is independent from  $\bar{\mathbf{R}}_0 \mathbf{U}$ ,  $\|\bar{\mathbf{R}}_0 \mathbf{U}\|_{\text{op}} = O_{\mathbb{P}}(1/\sqrt{n})$  and the fact that the elements of  $\mathbf{T}$  are  $O_{\mathbb{P}}(1)$ .

To analyze the first term, we define  $\delta_{p,q} = H_p(\tilde{\boldsymbol{\theta}}_*)^\top \bar{\mathbf{R}}_0 \mathbf{U} \mathbf{T} \mathbf{U}^\top \bar{\mathbf{R}}_0 H_q(\tilde{\boldsymbol{\theta}}_*)$  for all non-negative integers  $p, q$ . To analyze such terms, we first expand  $\mathbf{U} \mathbf{T} \mathbf{U}^\top$  as

$$\mathbf{U} \mathbf{T} \mathbf{U}^\top = \sum_{i=1}^{\ell} \sum_{j=1}^{\ell} N^{(i+j)/2-1} [\mathbf{M}_1^{-1}]_{i,j} (\mathbf{F}_0 \mathbf{a}^{\circ i}) (\mathbf{F}_0 \mathbf{a}^{\circ j})^\top + \sum_{i=1}^{\ell} \sum_{j=1}^{\ell} [\bar{\mathbf{M}}_2^{-1}]_{i,j} \tilde{\boldsymbol{\theta}}^{\circ i} \tilde{\boldsymbol{\theta}}^{\circ j \top}.$$

Thus, for any  $p, q \in \mathbb{N}_0$ , the terms  $\delta_{p,q}$  can be written as

$$\begin{aligned} \delta_{p,q} &= \sum_{i=1}^{\ell} \sum_{j=1}^{\ell} N^{(i+j)/2-1} [\mathbf{M}_1^{-1}]_{i,j} H_p(\tilde{\boldsymbol{\theta}}_*)^\top \bar{\mathbf{R}}_0 (\mathbf{F}_0 \mathbf{a}^{\circ i}) (\mathbf{F}_0 \mathbf{a}^{\circ j})^\top \bar{\mathbf{R}}_0 H_q(\tilde{\boldsymbol{\theta}}_*) \\ &\quad + \sum_{i=1}^{\ell} \sum_{j=1}^{\ell} [\bar{\mathbf{M}}_2^{-1}]_{i,j} H_p(\tilde{\boldsymbol{\theta}}_*)^\top \bar{\mathbf{R}}_0 \tilde{\boldsymbol{\theta}}^{\circ i} \tilde{\boldsymbol{\theta}}^{\circ j \top} \bar{\mathbf{R}}_0 H_q(\tilde{\boldsymbol{\theta}}_*). \end{aligned}$$

By an argument identical to the argument for the terms in  $\mathbf{M}_o$ , the first sum goes to zero in probability. Denoting  $\boldsymbol{\beta}/\|\boldsymbol{\beta}\|_2 := \tilde{\boldsymbol{\beta}}$ , we can expand  $(\tilde{\mathbf{X}}\boldsymbol{\beta})^{\circ i} = \|\boldsymbol{\beta}\|_2^i \sum_{k=0}^i \xi_{i,k} H_k(\tilde{\mathbf{X}}\tilde{\boldsymbol{\beta}}/\|\boldsymbol{\beta}\|_2)$ . To analyze  $\delta_{p,q}$ , we need the following result, whose proof is deferred to Section N.11.

**Lemma L.3.** For any  $p, q \in \mathbb{N}_0$ , we have

$$H_p(\tilde{\mathbf{X}}\tilde{\boldsymbol{\beta}})^\top \bar{\mathbf{R}}_0 H_q(\tilde{\mathbf{X}}\tilde{\boldsymbol{\beta}}) \rightarrow_P \begin{cases} \frac{p! \psi m_1}{\phi} \left( \frac{c_{*,1}}{\sqrt{\phi(c_*^2 + \sigma_\varepsilon^2) + c_{*,1}^2}} \right)^p & p = q \neq 1 \\ \frac{\psi m_2}{\phi} \frac{c_{*,1}}{\sqrt{\phi(c_*^2 + \sigma_\varepsilon^2) + c_{*,1}^2}} & p = q = 1 \\ 0 & p \neq q. \end{cases}$$

We can now use Lemma L.3 and the fact that  $\|\boldsymbol{\beta}\|_2 \rightarrow_P (\phi(c_*^2 + \sigma_\varepsilon^2) + c_{*,1}^2)^{1/2}$  to write

$$\begin{aligned} \delta_{p,q} &= \sum_{i=1}^{\ell} \sum_{j=1}^{\ell} [\bar{\mathbf{M}}_2^{-1}]_{i,j} \|\boldsymbol{\beta}\|_2^{i+j} \xi_{i,p} \xi_{j,q} H_p(\tilde{\boldsymbol{\theta}}_*)^\top \bar{\mathbf{R}}_0 H_p(\tilde{\mathbf{X}}\tilde{\boldsymbol{\beta}}) \cdot H_q(\tilde{\mathbf{X}}\tilde{\boldsymbol{\beta}})^\top \bar{\mathbf{R}}_0 H_q(\tilde{\boldsymbol{\theta}}_*) + o_{\mathbb{P}}(1) \\ &= \sum_{i=1}^{\ell} \sum_{j=1}^{\ell} [\boldsymbol{\Omega}]_{i,j} (\phi(c_*^2 + \sigma_\varepsilon^2) + c_{*,1}^2)^{(i+j)/2} \xi_{i,p} \xi_{j,q} r_p r_q + o_{\mathbb{P}}(1), \end{aligned}$$

for  $p, q \in [\ell]$ , which concludes the proof.  $\square$

## M INFINITE SAMPLE LIMIT

In the infinite sample limit, where  $n \gg N, d$ , we have  $\phi \rightarrow 0$ . In this extreme case, the expressions for  $m_1, m_2$  will further simplify as  $m_1, m_2 \rightarrow \phi/\lambda\psi$ . Note that in this limit, we have  $\mathcal{L}_{\text{tr}}(\mathbf{F}_0) \rightarrow \sigma_\varepsilon^2 + c_\star^2$  (see e.g., (Mei & Montanari, 2022, Section 6)). Using Corollary 4.5, we see that for example when  $\ell = 2$ , we have  $\mathcal{L}(\mathbf{F}) \rightarrow \sigma_\varepsilon^2 + \frac{2c_\star^2}{3} + c_{\star, >2}^2$ . In particular, the term corresponding to the linear component of the teacher function in  $\mathcal{L}(\mathbf{F}_0)$  cancels out with the corresponding term in  $\Delta_2$ .

## N PROOFS OF SUPPLEMENTARY LEMMAS

### N.1 PROOF OF LEMMA C.3

Recalling  $a_i \stackrel{i.i.d.}{\sim} \mathbf{N}(0, 1/N)$  and  $(\tilde{\mathbf{x}}_i, \boldsymbol{\beta})|\boldsymbol{\beta} \stackrel{i.i.d.}{\sim} \mathbf{N}(0, \|\boldsymbol{\beta}\|_2^2)$ , claims (a) and (b) follow from standard Gaussian maximal inequalities (van der Vaart & Wellner, 2013, Section 2.2) and from  $\|\boldsymbol{\beta}\|_2^2 = O_{\mathbb{P}}(1)$ ; the latter follows by writing  $\boldsymbol{\beta} = n^{-1}\mathbf{X}^\top(\sigma_\star(\mathbf{X}\boldsymbol{\beta}_\star) + \boldsymbol{\varepsilon})$ , where  $\boldsymbol{\varepsilon} = (\varepsilon_1, \dots, \varepsilon_n)^\top$  and using our distributional assumptions on  $\mathbf{X}, \boldsymbol{\varepsilon}$ , as well as Condition 2.2.

By (Vershynin, 2012, Theorem 5.39) and (Bai & Silverstein, 2010, Corollary A.21), we have  $\|\mathbf{W}_0\mathbf{W}_0^\top\|_{\text{op}}, \|(\mathbf{W}_0\mathbf{W}_0^\top)^{\circ 2}\|_{\text{op}} = O_{\mathbb{P}}(1)$ . Also, by (Vershynin, 2018, Theorem 3.4.6) and Gaussian maximal inequalities (van der Vaart & Wellner, 2013, Section 2.2), we have  $\max_{1 \leq i \neq j \leq N} \langle \mathbf{w}_{0,i}, \mathbf{w}_{0,j} \rangle = O_{\mathbb{P}}(n^{-\frac{1}{2}} \log^{\frac{1}{2}} n)$ . For  $k \geq 3$ ,

$$\begin{aligned} \|(\mathbf{W}_0\mathbf{W}_0^\top)^{\circ k}\|_{\text{op}} &\leq \|(\mathbf{W}_0\mathbf{W}_0^\top)^{\circ k} - \mathbf{I}_N\|_{\text{op}} + 1 \leq \|(\mathbf{W}_0\mathbf{W}_0^\top)^{\circ k} - \mathbf{I}_N\|_{\text{F}} + 1 \\ &\leq \left( \sum_{1 \leq i \neq j \leq N} \langle \mathbf{w}_{0,i}, \mathbf{w}_{0,j} \rangle^{2k} \right)^{\frac{1}{2}} + 1 = o_{\mathbb{P}}(1) + 1. \end{aligned}$$

Therefore,

$$M_{W_0} \leq \max \left\{ \|\mathbf{W}_0\mathbf{W}_0^\top\|_{\text{op}}, \|(\mathbf{W}_0\mathbf{W}_0^\top)^{\circ 2}\|_{\text{op}}, \sup_{k \geq 3} \|(\mathbf{W}_0\mathbf{W}_0^\top)^{\circ k}\|_{\text{op}} \right\} = O_{\mathbb{P}}(1).$$

Claim (d) is standard, see e.g. (Vershynin, 2018, Theorem 4.4.5).

### N.2 PROOF OF LEMMA K.1

We can write

$$\begin{aligned} \mathbf{v}^\top(\boldsymbol{\beta} - c_{\star,1}\boldsymbol{\beta}_\star) &= n^{-1}\mathbf{v}^\top(\mathbf{X}^\top(\sigma_\star(\mathbf{X}\boldsymbol{\beta}_\star) + \boldsymbol{\varepsilon})) - c_{\star,1}\boldsymbol{\beta}_\star \\ &= n^{-1} \sum_{i=1}^n (\mathbf{v}^\top \mathbf{x}_i \sigma_\star(\mathbf{x}_i^\top \boldsymbol{\beta}_\star) - c_{\star,1} \mathbf{v}^\top \boldsymbol{\beta}_\star) + n^{-1} \mathbf{v}^\top \boldsymbol{\varepsilon}. \end{aligned}$$

Now  $n^{-1}\mathbf{v}^\top \boldsymbol{\varepsilon} \sim \mathbf{N}(0, \sigma_\varepsilon^2 \|\mathbf{v}\|_2^2)/n \rightarrow_P 0$ . Moreover, by Condition 2.4, we can write  $\sigma_\star(\mathbf{x}_i^\top \boldsymbol{\beta}_\star) = c_{\star,0} + c_{\star,1} \mathbf{x}_i^\top \boldsymbol{\beta}_\star + (P_{>1} \sigma_\star)(\mathbf{x}_i^\top \boldsymbol{\beta}_\star)$ , where conditional on  $\boldsymbol{\beta}_\star$ ,  $(P_{>1} \sigma_\star)(\mathbf{x}_i^\top \boldsymbol{\beta}_\star)$  is orthogonal in  $L^2$  to the constant function and to  $\mathbf{x}_i^\top \boldsymbol{\beta}_\star$ . Hence the first sum above equals

$$n^{-1} c_{\star,0} \mathbf{v}^\top \sum_{i=1}^n \mathbf{x}_i + n^{-1} c_{\star,1} \mathbf{v}^\top \left( \sum_{i=1}^n \mathbf{x}_i \mathbf{x}_i^\top - \mathbf{I} \right) \boldsymbol{\beta}_\star + n^{-1} \sum_{i=1}^n \mathbf{v}^\top \mathbf{x}_i (P_{>1} \sigma_\star)(\mathbf{x}_i^\top \boldsymbol{\beta}_\star).$$

For the first term,  $n^{-1} c_{\star,0} \mathbf{v}^\top \sum_{i=1}^n \mathbf{x}_i \sim n^{-1} c_{\star,0} \cdot \mathbf{N}(0, n \|\mathbf{v}\|_2^2) \rightarrow_P 0$ . The second term is  $c_{\star,1}$  times a sample mean of i.i.d. random variables of the form  $\mathbf{v}^\top (\mathbf{x}_i \mathbf{x}_i^\top - \mathbf{I}) \boldsymbol{\beta}_\star$ , which have zero mean by the Gaussianity of  $\mathbf{x}_i$ , and for which all moments are finite. Hence, by the weak law of large numbers, this term converges to zero in probability.

Similarly, the third term is a sample mean of i.i.d. random variables of the form  $\mathbf{v}^\top \mathbf{x}_i(P_{>1}\sigma_*)(\mathbf{x}_i^\top \boldsymbol{\beta}_*)$ , which have zero mean by the Gaussianity of  $\mathbf{x}_i$  and Lemma C.1, and whose second moments are finite since  $\sigma_*$  is Lipschitz. Hence, by the weak law of large numbers, this term also converges to zero in probability. This finishes the proof of the first claim.

Next, the second statement follows from (Ba et al., 2022, Lemma 18). While that work has slightly different assumptions on the teacher function  $f_*$ , it is straightforward to check that their proof goes through unchanged under our assumptions. Specifically, their proof requires that  $\mathbf{x} \mapsto f_*(\mathbf{x}) = \sigma_*(\mathbf{x}^\top \boldsymbol{\beta}_*)$  is  $O(1)$ -Lipschitz, which holds in our case because  $\sigma_*$  is  $O(1)$ -Lipschitz, and  $\|\boldsymbol{\beta}_*\|_2 = O_{\mathbb{P}}(1)$ .

### N.3 PROOF OF LEMMA K.2

By plugging in  $\hat{\mathbf{a}}$  into the training loss, we find

$$\begin{aligned} \mathcal{L}_{\text{tr}}(\mathbf{F}) &= \frac{1}{n} \|\tilde{\mathbf{y}} - \mathbf{F}\hat{\mathbf{a}}\|_2^2 + \lambda \|\hat{\mathbf{a}}\|_2^2 = \frac{1}{n} \|\tilde{\mathbf{y}}\|_2^2 - \frac{2}{n} \tilde{\mathbf{y}}^\top \mathbf{F}\hat{\mathbf{a}} + \frac{1}{n} \hat{\mathbf{a}}^\top (\mathbf{F}^\top \mathbf{F} + \lambda n \mathbf{I}_N) \hat{\mathbf{a}} \\ &= \frac{1}{n} \|\tilde{\mathbf{y}}\|_2^2 - \frac{1}{n} \tilde{\mathbf{y}}^\top \mathbf{F}\hat{\mathbf{a}} = \frac{1}{n} \|\tilde{\mathbf{y}}\|_2^2 - \frac{1}{n} \tilde{\mathbf{y}}^\top \mathbf{F}(\mathbf{F}^\top \mathbf{F} + \lambda n \mathbf{I}_N)^{-1} \mathbf{F}^\top \tilde{\mathbf{y}} \\ &= \frac{1}{n} \|\tilde{\mathbf{y}}\|_2^2 - \frac{1}{n} \tilde{\mathbf{y}}^\top \mathbf{F}\mathbf{F}^\top (\mathbf{F}\mathbf{F}^\top + \lambda n \mathbf{I}_n)^{-1} \tilde{\mathbf{y}} \\ &= \frac{1}{n} \|\tilde{\mathbf{y}}\|_2^2 - \frac{1}{n} \tilde{\mathbf{y}}^\top (\mathbf{F}\mathbf{F}^\top + \lambda n \mathbf{I}_n) (\mathbf{F}\mathbf{F}^\top + \lambda n \mathbf{I}_n)^{-1} \tilde{\mathbf{y}} + \lambda \tilde{\mathbf{y}}^\top (\mathbf{F}\mathbf{F}^\top + \lambda n \mathbf{I}_n)^{-1} \tilde{\mathbf{y}} \\ &= \lambda \tilde{\mathbf{y}}^\top (\mathbf{F}\mathbf{F}^\top + \lambda n \mathbf{I}_n)^{-1} \tilde{\mathbf{y}}, \end{aligned}$$

which proves the lemma.

### N.4 PROOF OF LEMMA K.3

To prove the concentration of this term around its mean, we will use the generalized Hanson-Wright inequality (Sambale, 2023, Theorem 2.1) for  $\alpha$ -subexponential random variables. Note that, by definition, if  $Z$  is a Gaussian random variable,  $H_p(Z)$  is  $2/p$ -subexponential (see the definition in equation (1.1) of Sambale (2023)) and for these variables the Orlicz norm of order  $2/p$  is bounded (see equation (1.3) of Sambale (2023)). Also note that  $\|\mathbf{D}\|_{\text{Fr}} \leq \sqrt{n} \|\mathbf{D}\|_{\text{op}} = O_{\mathbb{P}}(1/\sqrt{n})$ . Thus, using (Sambale, 2023, Theorem 2.1) and setting  $t = \frac{\log(n)}{\sqrt{n}}$ , we find

$$\mathbb{P} \left( \left| g(\mathbf{Z})^\top \mathbf{D} g(\mathbf{Z}) - \mathbb{E}[g(\mathbf{Z})^\top \mathbf{D} g(\mathbf{Z})] \right| \geq \frac{\log n}{\sqrt{n}} \right) \leq 2 \exp \left( -C \min \left\{ \log^2(n), (\sqrt{n} \log n)^{1/p} \right\} \right),$$

where  $C > 0$  is some constant. This concludes the proof.

### N.5 PROOF OF LEMMA K.4

First, we show that switching from  $\mathbf{w}_{0,i} \stackrel{i.i.d.}{\sim} \text{Unif}(\mathbb{S}^{d-1})$  to  $\hat{\mathbf{w}}_{0,i} \stackrel{i.i.d.}{\sim} \mathcal{N}(0, \frac{1}{d} \mathbf{I}_d)$  will not change the limit of the terms  $\frac{1}{d} \mathbb{E} \text{tr}(\tilde{\mathbf{X}}^\top \tilde{\mathbf{R}}_0 \tilde{\mathbf{X}})$  and  $\mathbb{E} \text{tr}(\tilde{\mathbf{R}}_0)$  which will appear later in the proof. First, we define  $\hat{\mathbf{W}}_0 = [\hat{\mathbf{w}}_{0,1}, \dots, \hat{\mathbf{w}}_{0,N}]^\top$ ,

$$\begin{aligned} \mathbf{D} &= \text{diag} \left( \frac{1}{\|\hat{\mathbf{w}}_{0,1}\|_2}, \dots, \frac{1}{\|\hat{\mathbf{w}}_{0,N}\|_2} \right), \mathbf{W}_0 = {}^d \mathbf{D} \hat{\mathbf{W}}_0, \hat{\mathbf{F}}_0 = \sigma(\tilde{\mathbf{X}} \hat{\mathbf{W}}_0^\top), \\ \text{and } \hat{\mathbf{R}}_0 &= (\hat{\mathbf{F}}_0 \hat{\mathbf{F}}_0^\top + \lambda n \mathbf{I}_n)^{-1}. \end{aligned}$$

Then,

$$\begin{aligned} \left| \text{tr}[\tilde{\mathbf{R}}_0 - \hat{\mathbf{R}}_0] \right| &= \left| \text{tr} \left[ (\mathbf{F}_0 \mathbf{F}_0^\top + \lambda n \mathbf{I}_n)^{-1} - (\hat{\mathbf{F}}_0 \hat{\mathbf{F}}_0^\top + \lambda n \mathbf{I}_n)^{-1} \right] \right| \\ &= \left| \text{tr} \left[ (\mathbf{F}_0 \mathbf{F}_0^\top + \lambda n \mathbf{I}_n)^{-1} (\mathbf{F}_0 \mathbf{F}_0^\top - \hat{\mathbf{F}}_0 \hat{\mathbf{F}}_0^\top) (\hat{\mathbf{F}}_0 \hat{\mathbf{F}}_0^\top + \lambda n \mathbf{I}_n)^{-1} \right] \right| \\ &\leq \text{tr}(\mathbf{F}_0 \mathbf{F}_0^\top + \lambda n \mathbf{I}_n)^{-1} \|(\hat{\mathbf{F}}_0 \hat{\mathbf{F}}_0^\top + \lambda n \mathbf{I}_n)^{-1}\|_{\text{op}} \|\mathbf{F}_0 \mathbf{F}_0 - \hat{\mathbf{F}}_0 \hat{\mathbf{F}}_0\|_{\text{op}} \\ &\leq \frac{C}{n} \|\mathbf{F}_0 \mathbf{F}_0 - \hat{\mathbf{F}}_0 \hat{\mathbf{F}}_0\|_{\text{op}}. \end{aligned}$$

Now, using Conjecture 4.3, we can replace  $\mathbf{F}_0$  and  $\hat{\mathbf{F}}_0$  with  $\mathbf{F}_0 = c_1 \tilde{\mathbf{X}} \mathbf{W}_0^\top + c_{>1} \mathbf{Z}$  and  $\hat{\mathbf{F}}_0 = c_1 \tilde{\mathbf{X}} \hat{\mathbf{W}}_0^\top + c_{>1} \mathbf{Z}$ , respectively, without changing the limit. With this, we have

$$\begin{aligned} & \mathbf{F}_0 \mathbf{F}_0^\top - \hat{\mathbf{F}}_0 \hat{\mathbf{F}}_0^\top \\ &= c_1^2 \tilde{\mathbf{X}} (\mathbf{W}_0 \mathbf{W}_0^\top - \hat{\mathbf{W}}_0 \hat{\mathbf{W}}_0^\top) \tilde{\mathbf{X}}^\top + c_1 c_{>1} \tilde{\mathbf{X}} (\mathbf{W}_0 - \hat{\mathbf{W}}_0)^\top \mathbf{Z}^\top + c_1 c_{>1} \mathbf{Z} (\mathbf{W}_0 - \hat{\mathbf{W}}_0) \tilde{\mathbf{X}}^\top. \end{aligned}$$

Now,

$$\|\mathbf{W}_0 \mathbf{W}_0^\top - \hat{\mathbf{W}}_0 \hat{\mathbf{W}}_0^\top\|_{\text{op}} \leq \|\mathbf{I}_N - \mathbf{D}\|_{\text{op}} \|\mathbf{W}_0 \mathbf{W}_0^\top\|_{\text{op}} (\|\mathbf{D}\|_{\text{op}} + 1).$$

Note that  $\|\mathbf{W}_0 \mathbf{W}_0^\top\|_{\text{op}} = O_{\mathbb{P}}(1)$ ,  $\|\mathbf{D}\|_{\text{op}} = O_{\mathbb{P}}(1)$ , and  $\|\mathbf{I}_N - \mathbf{D}\|_{\text{op}} = o_{\mathbb{P}}(1)$ . Thus  $\|\mathbf{W}_0 \mathbf{W}_0^\top - \hat{\mathbf{W}}_0 \hat{\mathbf{W}}_0^\top\|_{\text{op}} = o_{\mathbb{P}}(1)$ . Also, similarly,  $\|\mathbf{W}_0 - \hat{\mathbf{W}}_0\|_{\text{op}} = o_{\mathbb{P}}(1)$ . Hence, noting that  $\|\tilde{\mathbf{X}}\|_{\text{op}}$  and  $\|\mathbf{Z}\|_{\text{op}}$  are both  $O_{\mathbb{P}}(\sqrt{N})$ , we have  $\frac{1}{n} \|\mathbf{F}_0 \mathbf{F}_0^\top - \hat{\mathbf{F}}_0 \hat{\mathbf{F}}_0^\top\|_{\text{op}} \rightarrow_P 0$ . This implies that  $|\text{tr}[\bar{\mathbf{R}}_0 - \hat{\mathbf{R}}_0]| = o_{\mathbb{P}}(1)$ . Also,

$$\left| \frac{1}{d} \text{tr} [\tilde{\mathbf{X}}^\top \bar{\mathbf{R}}_0 \tilde{\mathbf{X}}] - \frac{1}{d} \text{tr} [\tilde{\mathbf{X}}^\top \hat{\mathbf{R}}_0 \tilde{\mathbf{X}}] \right| \leq |\text{tr}[\bar{\mathbf{R}}_0 - \hat{\mathbf{R}}_0]| \frac{\|\tilde{\mathbf{X}} \tilde{\mathbf{X}}^\top\|_{\text{op}}}{d} \rightarrow_P 0.$$

Finally, we can prove the required claims as follows:

- (a) Since  $\beta_\star \sim \mathcal{N}(0, \frac{1}{d} \mathbf{I}_d)$ , we have

$$\beta_\star^\top \tilde{\mathbf{X}}^\top \bar{\mathbf{R}}_0 \tilde{\mathbf{X}} \beta_\star = \frac{1}{d} \mathbb{E} \text{tr}(\tilde{\mathbf{X}}^\top \bar{\mathbf{R}}_0 \tilde{\mathbf{X}}) + o_{\mathbb{P}}(1),$$

by the Hanson-Wright inequality. Note that by the argument above, we can assume that  $\hat{\mathbf{w}}_{0,i} \stackrel{i.i.d.}{\sim} \mathcal{N}(0, \frac{1}{d} \mathbf{I}_d)$  without changing the limiting trace. Further, from (Adlam & Pennington, 2020a, Proposition 1), see also Adlam et al. (2022), we have  $\frac{1}{d} \mathbb{E} \text{tr}(\tilde{\mathbf{X}}^\top \bar{\mathbf{R}}_0 \tilde{\mathbf{X}}) \rightarrow \frac{\psi}{\phi} m_2$ ; see the discussion at the end of this proof for the detailed explanation. Now, we arrive at the conclusion by applying Lemma K.1.

- (b) Since  $\mathbf{a} \sim \mathcal{N}(0, \frac{1}{N} \mathbf{I}_N)$ , we have

$$\mathbf{a}^\top \mathbf{F}_0^\top \bar{\mathbf{R}}_0 \mathbf{F}_0 \mathbf{a} - \|\mathbf{a}\|_2^2 = \frac{1}{N} \text{tr}(\mathbf{F}_0^\top \bar{\mathbf{R}}_0 \mathbf{F}_0) - 1 + o_{\mathbb{P}}(1)$$

by the Hanson-Wright inequality. Moreover,

$$\begin{aligned} \mathbf{F}_0^\top \bar{\mathbf{R}}_0 \mathbf{F}_0 &= \mathbf{F}_0^\top \mathbf{F}_0 (\mathbf{F}_0^\top \mathbf{F}_0 + \lambda n \mathbf{I}_N)^{-1} \\ &= (\mathbf{F}_0^\top \mathbf{F}_0 + \lambda n \mathbf{I}_N - \lambda n \mathbf{I}_N) (\mathbf{F}_0^\top \mathbf{F}_0 + \lambda n \mathbf{I}_N)^{-1} = \mathbf{I}_N - \lambda n (\mathbf{F}_0^\top \mathbf{F}_0 + \lambda n \mathbf{I}_N)^{-1}. \end{aligned}$$

Hence,  $\frac{1}{N} \text{tr}(\mathbf{F}_0^\top \bar{\mathbf{R}}_0 \mathbf{F}_0) - 1 = -\frac{\lambda n}{N} \text{tr}(\mathbf{F}_0^\top \mathbf{F}_0 + \lambda n \mathbf{I}_N)^{-1}$ . From the argument above, we can assume that  $\hat{\mathbf{w}}_{0,i} \stackrel{i.i.d.}{\sim} \mathcal{N}(0, \frac{1}{d} \mathbf{I}_d)$  without changing the limiting trace. It follows from (Adlam & Pennington, 2020a, Proposition 1) that  $\mathbb{E} \text{tr} \bar{\mathbf{R}}_0 \rightarrow \frac{\psi}{\phi} m_1$ ; again see the discussion at the end of this proof for the detailed explanation. Note that  $\lim \mathbb{E} \text{tr} \bar{\mathbf{R}}_0$  is the limiting Stieltjes transform of  $\mathbf{F}_0 \mathbf{F}_0^\top$ . Hence,  $\bar{m}_1 = \lim \mathbb{E} \text{tr}(\mathbf{F}_0^\top \mathbf{F}_0 + \lambda n \mathbf{I}_N)^{-1}$  is the limiting companion Stieltjes transform of  $m_1$  which is given by

$$\bar{m}_1 = \frac{\psi}{\phi} m_1 - \left(1 - \frac{\phi}{\psi}\right) \frac{1}{\lambda}. \quad (34)$$

This concludes the proof.

For the reader's convenience, we provide the following diagram that shows how the notations of Adlam & Pennington (2020a) (left) match ( $\Leftrightarrow$ ) ours (right):

$$\begin{aligned} n_0 &\Leftrightarrow d, & n_1 &\Leftrightarrow N, & m &\Leftrightarrow n, & \phi, \psi &\Leftrightarrow \phi, \psi, \\ \mathbf{X}^\top &\in \mathbb{R}^{m \times n_0} &\Leftrightarrow \tilde{\mathbf{X}} &\in \mathbb{R}^{n \times d}, & \mathbf{F}^\top &\in \mathbb{R}^{m \times n_1} &\Leftrightarrow \mathbf{F}_0 &\in \mathbb{R}^{n \times N}, & \sigma_{W_2} &= 0, \\ \frac{1}{n_1} \mathbf{K} (\lambda m / n_1)^{-1} &= \frac{1}{n_1} \mathbf{F}^\top \mathbf{F} + \lambda \mathbf{I}_m &\Leftrightarrow \bar{\mathbf{R}}_0^{-1} &= \mathbf{F}_0 \mathbf{F}_0^\top + \lambda n \mathbf{I}_n, & \zeta &\Leftrightarrow c_1^2, & \eta &\Leftrightarrow c_1^2 + c_{>1}^2, \\ \tau_1 &= \frac{1}{m} \mathbb{E} \text{tr} \mathbf{K}^{-1} &\Leftrightarrow m_1 &= \frac{N}{n} \mathbb{E} \text{tr} \bar{\mathbf{R}}_0, & \tau_2 &= \frac{1}{mn_0} \mathbb{E} \text{tr} \mathbf{X}^\top \mathbf{X} \mathbf{K}^{-1} &\Leftrightarrow m_2 &= \frac{N}{nd} \mathbb{E} \text{tr} \tilde{\mathbf{X}} \tilde{\mathbf{X}}^\top \bar{\mathbf{R}}_0. \end{aligned}$$

## N.6 PROOF OF LEMMA K.5

Define  $\hat{\tilde{\mathbf{X}}} = \tilde{\mathbf{X}} - \tilde{\mathbf{X}}\mathbf{u}\mathbf{u}^\top$ , which implies  $\hat{\tilde{\mathbf{X}}} \perp \tilde{\mathbf{X}}\mathbf{u}$  due to the Gaussianity of  $\mathbf{X}$ . Based on Conjecture 4.3, we can replace  $\mathbf{F}_0$  with  $c_1\tilde{\mathbf{X}}\mathbf{W}_0^\top + c_{>1}\mathbf{Z}$ , where  $\mathbf{Z} \in \mathbb{R}^{n \times d}$  is an independent random matrix with  $\mathcal{N}(0, 1)$  entries, without changing the conclusion. Hence, from now on, we write  $\mathbf{F}_0 = c_1\tilde{\mathbf{X}}\mathbf{W}_0^\top + c_{>1}\mathbf{Z}$ . Further, we define

$$\hat{\mathbf{F}}_0 = c_1\hat{\tilde{\mathbf{X}}}\mathbf{W}_0^\top + c_{>1}\mathbf{Z}. \quad (35)$$

Thus, by the definition of  $\hat{\tilde{\mathbf{X}}}$ ,  $\hat{\mathbf{F}}_0 = \mathbf{F}_0 - c_1\tilde{\mathbf{X}}\mathbf{u}(\mathbf{W}_0\mathbf{u})^\top$ . As a consequence, we also have  $\mathbf{F}_0\mathbf{F}_0^\top = \hat{\mathbf{F}}_0\hat{\mathbf{F}}_0^\top + \mathbf{V}\mathbf{D}\mathbf{V}^\top$ , where  $\mathbf{V} = [\hat{\mathbf{F}}_0\mathbf{W}_0\mathbf{u} \quad \tilde{\mathbf{X}}\mathbf{u}] \in \mathbb{R}^{n \times 2}$  and

$$\mathbf{D} = \begin{bmatrix} 0 & c_1 \\ c_1 & c_1^2\|\mathbf{W}_0\mathbf{u}\|_2^2 \end{bmatrix}.$$

Noting that  $\mathbf{D}$  is invertible, and using the Woodbury formula, with  $\hat{\mathbf{R}}_0 = (\hat{\mathbf{F}}_0\hat{\mathbf{F}}_0^\top + \lambda n\mathbf{I}_n)^{-1}$ , we find

$$\bar{\mathbf{R}}_0 = \hat{\mathbf{R}}_0 - \hat{\mathbf{R}}_0\mathbf{V}(\mathbf{D}^{-1} + \mathbf{V}^\top\hat{\mathbf{R}}_0\mathbf{V})^{-1}\mathbf{V}^\top\hat{\mathbf{R}}_0. \quad (36)$$

Now, we can write

$$\begin{aligned} & H_q(\tilde{\mathbf{X}}\mathbf{u})^\top \bar{\mathbf{R}}_0 H_p(\tilde{\mathbf{X}}\mathbf{u}) \\ &= H_q(\tilde{\mathbf{X}}\mathbf{u})^\top \hat{\mathbf{R}}_0 H_p(\tilde{\mathbf{X}}\mathbf{u}) - H_q(\tilde{\mathbf{X}}\mathbf{u})^\top \hat{\mathbf{R}}_0\mathbf{V}(\mathbf{D}^{-1} + \mathbf{V}^\top\hat{\mathbf{R}}_0\mathbf{V})^{-1}\mathbf{V}^\top\hat{\mathbf{R}}_0 H_p(\tilde{\mathbf{X}}\mathbf{u}). \end{aligned}$$

Next, we can analyze each term in the above sum separately.

The first term on the right hand side converges to zero by using Lemma K.3 to prove the concentration of this term around its mean and noting that the mean is zero using the orthogonality property of Hermite polynomials (Lemma C.1).

To analyze the second term, we first study the matrix  $\mathbf{K} = (\mathbf{D}^{-1} + \mathbf{V}^\top\hat{\mathbf{R}}_0\mathbf{V})^{-1}$ , writing

$$\mathbf{K}^{-1} = (\mathbf{D}^{-1} + \mathbf{V}^\top\hat{\mathbf{R}}_0\mathbf{V}) = \begin{bmatrix} \mathbf{u}^\top\mathbf{W}_0^\top\hat{\mathbf{F}}_0^\top\hat{\mathbf{R}}_0\hat{\mathbf{F}}_0\mathbf{W}_0\mathbf{u} - \|\mathbf{W}_0\mathbf{u}\|_2^2 & \mathbf{u}^\top\mathbf{W}_0^\top\hat{\mathbf{F}}_0^\top\hat{\mathbf{R}}_0\tilde{\mathbf{X}}\mathbf{u} - \frac{1}{c_1} \\ \mathbf{u}^\top\tilde{\mathbf{X}}^\top\hat{\mathbf{R}}_0\hat{\mathbf{F}}_0\mathbf{W}_0\mathbf{u} - \frac{1}{c_1} & \mathbf{u}^\top\tilde{\mathbf{X}}^\top\hat{\mathbf{R}}_0\tilde{\mathbf{X}}\mathbf{u} \end{bmatrix}.$$

It can readily verified that all elements in this matrix are  $O_{\mathbb{P}}(1)$  by checking the order of the operator and Euclidean norms. Next, we analyze the terms in the expression

$$\begin{aligned} H_q(\tilde{\mathbf{X}}\mathbf{u})^\top \hat{\mathbf{R}}_0\mathbf{V}\mathbf{K}\mathbf{V}^\top\hat{\mathbf{R}}_0 H_p(\tilde{\mathbf{X}}\mathbf{u}) &= [\mathbf{K}]_{1,1}H_q(\tilde{\mathbf{X}}\mathbf{u})^\top \hat{\mathbf{R}}_0(\hat{\mathbf{F}}_0\mathbf{W}_0\mathbf{u})(\hat{\mathbf{F}}_0\mathbf{W}_0\mathbf{u})^\top \hat{\mathbf{R}}_0 H_p(\tilde{\mathbf{X}}\mathbf{u}) \\ &\quad + [\mathbf{K}]_{1,2}H_q(\tilde{\mathbf{X}}\mathbf{u})^\top \hat{\mathbf{R}}_0(\hat{\mathbf{F}}_0\mathbf{W}_0\mathbf{u})(\tilde{\mathbf{X}}\mathbf{u})^\top \hat{\mathbf{R}}_0 H_p(\tilde{\mathbf{X}}\mathbf{u}) \\ &\quad + [\mathbf{K}]_{2,1}H_q(\tilde{\mathbf{X}}\mathbf{u})^\top \hat{\mathbf{R}}_0(\tilde{\mathbf{X}}\mathbf{u})(\hat{\mathbf{F}}_0\mathbf{W}_0\mathbf{u})^\top \hat{\mathbf{R}}_0 H_p(\tilde{\mathbf{X}}\mathbf{u}) \\ &\quad + [\mathbf{K}]_{2,2}H_q(\tilde{\mathbf{X}}\mathbf{u})^\top \hat{\mathbf{R}}_0(\tilde{\mathbf{X}}\mathbf{u})(\tilde{\mathbf{X}}\mathbf{u})^\top \hat{\mathbf{R}}_0 H_p(\tilde{\mathbf{X}}\mathbf{u}). \end{aligned}$$

Without loss of generality, we can assume that  $p \neq 1$ .

- **First Term.** Note that  $H_q(\tilde{\mathbf{X}}\mathbf{u})^\top$  and  $H_p(\tilde{\mathbf{X}}\mathbf{u})$  are orthogonal in  $L^2$  by the properties of the Hermite polynomials, and conditional on  $\mathbf{u}$ , they are independent of  $\hat{\mathbf{R}}_0(\hat{\mathbf{F}}_0\mathbf{W}_0\mathbf{u})(\hat{\mathbf{F}}_0\mathbf{W}_0\mathbf{u})^\top \hat{\mathbf{R}}_0$ . Moreover,

$$\|\hat{\mathbf{R}}_0(\hat{\mathbf{F}}_0\mathbf{W}_0\mathbf{u})(\hat{\mathbf{F}}_0\mathbf{W}_0\mathbf{u})^\top \hat{\mathbf{R}}_0\|_{\text{op}} = O_{\mathbb{P}}(1/n).$$

Thus, by using Lemma K.3, this term converges to zero.

- **Second Term.** Similar to the argument above, we can show that  $(\tilde{\mathbf{X}}\mathbf{u})^\top \hat{\mathbf{R}}_0 H_p(\tilde{\mathbf{X}}\mathbf{u})$  converges to zero. Also, by analyzing the operator norms, we have  $H_q(\tilde{\mathbf{X}}\mathbf{u})^\top \hat{\mathbf{R}}_0(\hat{\mathbf{F}}_0\mathbf{W}_0\mathbf{u}) = O(1)$ . This implies that the second term converges to zero.
- **Third Term.** First, note that by a simple order-wise analysis,  $H_q(\tilde{\mathbf{X}}\mathbf{u})^\top \hat{\mathbf{R}}_0(\tilde{\mathbf{X}}\mathbf{u}) = O_{\mathbb{P}}(1)$ . Now, we have  $H_p(\tilde{\mathbf{X}}\mathbf{u})$  is independent of  $(\hat{\mathbf{F}}_0\mathbf{W}_0\mathbf{u})^\top \hat{\mathbf{R}}_0$  and  $\|(\hat{\mathbf{F}}_0\mathbf{W}_0\mathbf{u})^\top \hat{\mathbf{R}}_0\|_2 = O_{\mathbb{P}}(1/\sqrt{n})$ . The term  $(\hat{\mathbf{F}}_0\mathbf{W}_0\mathbf{u})^\top \hat{\mathbf{R}}_0 H_p(\tilde{\mathbf{X}}\mathbf{u})$  converges to zero in probability by noting that  $H_p(\tilde{\mathbf{X}}\mathbf{u})$  is mean zero for  $p \neq 0$ . For the  $p = 0$  case, we can use an orthogonality invariance argument identical to the one used to analyze equation 27.

- **Fourth Term.** This term also converges to zero because  $(\tilde{\mathbf{X}}\mathbf{u})^\top \hat{\mathbf{R}}_0 H_p(\tilde{\mathbf{X}}\mathbf{u})$  converges to zero, as argued above.

Putting everything together, the proof is completed.

## N.7 PROOF OF LEMMA K.6

We will prove part (a) first. To do this, we will first handle the cases where  $p = 0$  and  $p = 1$ .

For  $p = 0$ , we have

$$\sqrt{N}H_0(\tilde{\boldsymbol{\theta}}_\star)\bar{\mathbf{R}}_0\mathbf{F}_0\mathbf{a}^{\circ 2} = \sqrt{N}\mathbf{1}_n^\top \bar{\mathbf{R}}_0\mathbf{F}_0\mathbf{a}^{\circ 2}.$$

This is identical to the second term in equation 27 and it is shown to be  $o_{\mathbb{P}}(1)$

For  $p = 1$ , we need to analyze

$$\sqrt{N}H_1(\tilde{\boldsymbol{\theta}}_\star)\bar{\mathbf{R}}_0\mathbf{F}_0\mathbf{a}^{\circ 2} = \sqrt{N}\boldsymbol{\beta}_\star^\top \tilde{\mathbf{X}}^\top \bar{\mathbf{R}}_0\mathbf{F}_0\mathbf{a}^{\circ 2}.$$

Note that  $\boldsymbol{\beta}_\star \sim \mathcal{N}(0, \frac{1}{d}\mathbf{I}_d)$  is independent of  $\sqrt{N}\tilde{\mathbf{X}}^\top \bar{\mathbf{R}}_0\mathbf{F}_0\mathbf{a}^{\circ 2}$  and

$$\|\sqrt{N}\tilde{\mathbf{X}}^\top \bar{\mathbf{R}}_0\mathbf{F}_0\mathbf{a}^{\circ 2}\|_2 \leq \sqrt{N}\|\tilde{\mathbf{X}}\|_{\text{op}} \cdot \|\bar{\mathbf{R}}_0\|_{\text{op}} \cdot \|\mathbf{F}_0\|_{\text{op}} \cdot \|\mathbf{a}^{\circ 2}\|_2 = O_{\mathbb{P}}(1).$$

Thus, we can conclude that  $\sqrt{N}H_1(\tilde{\boldsymbol{\theta}}_\star)\bar{\mathbf{R}}_0\mathbf{F}_0\mathbf{a}^{\circ 2} \rightarrow 0$  in probability.

To analyze the case where  $p > 1$ , we first define  $\hat{\mathbf{X}} = \tilde{\mathbf{X}} - \tilde{\boldsymbol{\theta}}_\star\boldsymbol{\beta}_\star^\top$ . By construction, we have  $\hat{\mathbf{X}} \perp \tilde{\boldsymbol{\theta}}_\star$ . As in the proof of Lemma K.5, Based on Conjecture 4.3, we can replace  $\mathbf{F}_0$  with  $c_1\hat{\mathbf{X}}\mathbf{W}_0^\top + c_{>1}\mathbf{Z}$  in our computations without changing the limiting result, where  $\mathbf{Z} \in \mathbb{R}^{n \times d}$  is an independent random matrix with  $\mathcal{N}(0, 1)$  entries. Thus, from now on, we denote  $\mathbf{F}_0 = c_1\hat{\mathbf{X}}\mathbf{W}_0^\top + c_{>1}\mathbf{Z}$ . We define  $\hat{\mathbf{F}}_0$  as in equation 35. Thus,  $\hat{\mathbf{F}}_0 = \mathbf{F}_0 - c_1\tilde{\boldsymbol{\theta}}_\star(\mathbf{W}_0\boldsymbol{\beta}_\star)^\top$ . As a consequence, we can write  $\mathbf{F}_0\hat{\mathbf{F}}_0^\top = \hat{\mathbf{F}}_0\hat{\mathbf{F}}_0^\top + \mathbf{V}\mathbf{D}\mathbf{V}^\top$ , where  $\mathbf{V} = [\hat{\mathbf{F}}_0\mathbf{W}_0\boldsymbol{\beta}_\star \quad \tilde{\boldsymbol{\theta}}_\star] \in \mathbb{R}^{n \times 2}$  and

$$\mathbf{D} = \begin{bmatrix} 0 & c_1 \\ c_1 & c_1^2\|\mathbf{W}_0\boldsymbol{\beta}_\star\|_2^2 \end{bmatrix}.$$

Using the Woodbury formula, we find that equation 36 still holds. Now, we can write

$$\begin{aligned} & \sqrt{N}H_p(\tilde{\boldsymbol{\theta}}_\star)^\top \bar{\mathbf{R}}_0\mathbf{F}_0\mathbf{a}^{\circ 2} \\ &= \sqrt{N}H_p(\tilde{\boldsymbol{\theta}}_\star)^\top \hat{\mathbf{R}}_0\mathbf{F}_0\mathbf{a}^{\circ 2} - \sqrt{N}H_p(\tilde{\boldsymbol{\theta}}_\star)^\top \hat{\mathbf{R}}_0\mathbf{V}(\mathbf{D}^{-1} + \mathbf{V}^\top \hat{\mathbf{R}}_0\mathbf{V})^{-1}\mathbf{V}^\top \hat{\mathbf{R}}_0\mathbf{F}_0\mathbf{a}^{\circ 2} \\ &= \sqrt{N}H_p(\tilde{\boldsymbol{\theta}}_\star)^\top \hat{\mathbf{R}}_0(\hat{\mathbf{F}}_0 + c_1\tilde{\boldsymbol{\theta}}_\star(\mathbf{W}_0\boldsymbol{\beta}_\star)^\top)\mathbf{a}^{\circ 2} \\ & \quad - \sqrt{N}H_p(\tilde{\boldsymbol{\theta}}_\star)^\top \hat{\mathbf{R}}_0\mathbf{V}(\mathbf{D}^{-1} + \mathbf{V}^\top \hat{\mathbf{R}}_0\mathbf{V})^{-1}\mathbf{V}^\top \hat{\mathbf{R}}_0(\hat{\mathbf{F}}_0 + c_1\tilde{\boldsymbol{\theta}}_\star(\mathbf{W}_0\boldsymbol{\beta}_\star)^\top)\mathbf{a}^{\circ 2}. \end{aligned} \tag{37}$$

Now, we can analyze each term in the above sum separately.

**Term 1.** Note that by a simple orderwise analysis,

$$\|\sqrt{N}\hat{\mathbf{R}}_0\hat{\mathbf{F}}_0\mathbf{a}^{\circ 2}\|_{\text{op}} \leq \sqrt{N}\|\hat{\mathbf{R}}_0\|_{\text{op}}\|\hat{\mathbf{F}}_0\|_{\text{op}}\|\mathbf{a}^{\circ 2}\|_2 = O(1/\sqrt{N}).$$

We have  $\|H_p(\tilde{\boldsymbol{\theta}}_\star)\|_2 = O_{\mathbb{P}}(\sqrt{N})$ ,  $\mathbb{E}[H_p(\tilde{\boldsymbol{\theta}}_\star)] = 0$ , and  $H_p(\tilde{\boldsymbol{\theta}}_\star)$  has independent entries. Also  $H_p(\tilde{\boldsymbol{\theta}}_\star) \perp \bar{\mathbf{R}}_0\hat{\mathbf{F}}_0\mathbf{a}^{\circ 2}$ . Thus,  $\sqrt{N}H_p(\tilde{\boldsymbol{\theta}}_\star)^\top \bar{\mathbf{R}}_0\hat{\mathbf{F}}_0\mathbf{a}^{\circ 2} \rightarrow_P 0$ .

We now need to analyze  $\sqrt{N}H_p(\tilde{\boldsymbol{\theta}}_\star)^\top \hat{\mathbf{R}}_0\tilde{\boldsymbol{\theta}}_\star\boldsymbol{\beta}_\star^\top \mathbf{W}_0^\top \mathbf{a}^{\circ 2}$ . Note that  $H_p(\tilde{\boldsymbol{\theta}}_\star)^\top \hat{\mathbf{R}}_0\tilde{\boldsymbol{\theta}}_\star = O_{\mathbb{P}}(1)$  by a simple order analysis of the norms. We also have  $\sqrt{N}\boldsymbol{\beta}_\star^\top \mathbf{W}_0^\top \mathbf{a}^{\circ 2} \rightarrow_P 0$ , because  $\boldsymbol{\beta}_\star \sim \mathcal{N}(0, \frac{1}{d}\mathbf{I}_d)$  is independent of the norm bounded vector  $\sqrt{N}\mathbf{W}_0^\top \mathbf{a}^{\circ 2}$ .

**Term 2.** To analyze the second term, we first study the matrix  $\mathbf{K} = (\mathbf{D}^{-1} + \mathbf{V}^\top \hat{\mathbf{R}}_0\mathbf{V})^{-1}$ :

$$\mathbf{K}^{-1} = (\mathbf{D}^{-1} + \mathbf{V}^\top \hat{\mathbf{R}}_0\mathbf{V}) = \begin{bmatrix} \boldsymbol{\beta}_\star^\top \mathbf{W}_0^\top \hat{\mathbf{F}}_0^\top \hat{\mathbf{R}}_0 \hat{\mathbf{F}}_0 \mathbf{W}_0 \boldsymbol{\beta}_\star - \|\mathbf{W}_0 \boldsymbol{\beta}_\star\|_2^2 & \boldsymbol{\beta}_\star^\top \mathbf{W}_0^\top \hat{\mathbf{F}}_0^\top \hat{\mathbf{R}}_0 \tilde{\boldsymbol{\theta}}_\star - \frac{1}{c_1} \\ \boldsymbol{\beta}_\star^\top \tilde{\mathbf{X}}^\top \hat{\mathbf{R}}_0 \hat{\mathbf{F}}_0 \mathbf{W}_0 \boldsymbol{\beta}_\star - \frac{1}{c_1} & \boldsymbol{\beta}_\star^\top \tilde{\mathbf{X}}^\top \hat{\mathbf{R}}_0 \tilde{\boldsymbol{\theta}}_\star \end{bmatrix}.$$

By orderwise analysis, all elements in this matrix converge to deterministic  $O_{\mathbb{P}}(1)$  values in probability. We write the second term in equation 37 as follows:

$$\begin{aligned} & \sqrt{N}H_p(\tilde{\theta}_*)^\top \hat{\mathbf{R}}_0 \mathbf{V} \mathbf{K} \mathbf{V}^\top \hat{\mathbf{R}}_0 \mathbf{F}_0 \mathbf{a}^{\circ 2} \\ &= [\mathbf{K}]_{1,1} H_p(\tilde{\theta}_*)^\top \hat{\mathbf{R}}_0 (\hat{\mathbf{F}}_0 \mathbf{W}_0 \beta_*) (\hat{\mathbf{F}}_0 \mathbf{W}_0 \beta_*)^\top \hat{\mathbf{R}}_0 \mathbf{F}_0 (\sqrt{N} \mathbf{a}^{\circ 2}) \\ &+ [\mathbf{K}]_{1,2} H_p(\tilde{\theta}_*)^\top \hat{\mathbf{R}}_0 (\hat{\mathbf{F}}_0 \mathbf{W}_0 \beta_*) \tilde{\theta}_*^\top \hat{\mathbf{R}}_0 \mathbf{F}_0 (\sqrt{N} \mathbf{a}^{\circ 2}) \\ &+ [\mathbf{K}]_{2,1} H_p(\tilde{\theta}_*)^\top \hat{\mathbf{R}}_0 (\tilde{\theta}_*) (\hat{\mathbf{F}}_0 \mathbf{W}_0 \beta_*)^\top \hat{\mathbf{R}}_0 \mathbf{F}_0 (\sqrt{N} \mathbf{a}^{\circ 2}) \\ &+ [\mathbf{K}]_{2,2} H_p(\tilde{\theta}_*)^\top \hat{\mathbf{R}}_0 (\tilde{\theta}_*) \tilde{\theta}_*^\top \hat{\mathbf{R}}_0 \mathbf{F}_0 (\sqrt{N} \mathbf{a}^{\circ 2}). \end{aligned}$$

In the sum above, we will show that each term converges to zero.

- **First term:** By orderwise analysis, we have  $\|\hat{\mathbf{R}}_0(\hat{\mathbf{F}}_0 \mathbf{W}_0 \beta_*)\|_{\text{op}} = O_{\mathbb{P}}(1/\sqrt{N})$ . Further,  $H_p(\tilde{\theta}_*)$  is independent of it (only considering the randomness in  $\tilde{\mathbf{X}}$ ) with mean zero and  $\|H_p(\tilde{\theta}_*)\|_2 = O_{\mathbb{P}}(\sqrt{N})$ . This implies that

$$H_p(\tilde{\theta}_*)^\top \hat{\mathbf{R}}_0 (\hat{\mathbf{F}}_0 \mathbf{W}_0 \beta_*) \rightarrow_P 0. \quad (38)$$

We can use a simple order argument to show that  $\sqrt{N}(\hat{\mathbf{F}}_0 \mathbf{W}_0 \beta_*)^\top \hat{\mathbf{R}}_0 \mathbf{F}_0 \mathbf{a}^{\circ 2} = O_{\mathbb{P}}(1)$ . Thus, the first term converges to zero.

- **Second term:** For this term, we use the fact that  $H_p(\tilde{\theta}_*)^\top \hat{\mathbf{R}}_0 (\hat{\mathbf{F}}_0 \mathbf{W}_0 \beta_*) \rightarrow_P 0$ . We can also use an orderwise analysis to prove that  $\sqrt{N}(\tilde{\theta}_*)^\top \hat{\mathbf{R}}_0 \mathbf{F}_0 \mathbf{a}^{\circ 2} = O_{\mathbb{P}}(1)$ . This proves that the second term also converges to zero.
- **Third term:** By a simple orderwise analysis, we have  $\sqrt{N}(\hat{\mathbf{F}}_0 \mathbf{W}_0 \beta_*)^\top \hat{\mathbf{R}}_0 \mathbf{F}_0 \mathbf{a}^{\circ 2} = O_{\mathbb{P}}(1)$ . To show that the third term converges to zero, it is enough to show that  $H_p(\tilde{\theta}_*)^\top \hat{\mathbf{R}}_0 (\tilde{\theta}_*) \rightarrow_P 0$ , which is true for  $p \neq 1$  by using Lemma K.3 and the orthogonality property of Hermite polynomials (Lemma C.1).
- **Fourth term:** By a simple orderwise analysis, we have  $\sqrt{N} \tilde{\theta}_*^\top \hat{\mathbf{R}}_0 \mathbf{F}_0 \mathbf{a}^{\circ 2} = O_{\mathbb{P}}(1)$ . Again, to show that the fourth term converges to zero, it is enough to show that  $H_p(\tilde{\theta}_*)^\top \hat{\mathbf{R}}_0 (\tilde{\theta}_*) \rightarrow_P 0$ , which is true for  $p \neq 1$  as argued above.

Putting everything together, part (a) follows. The proof for part (b) is identical and omitted.

## N.8 PROOF OF LEMMA K.7

We will study the cases where  $s = 1$  and  $s = 2$  separately. For  $s = 1$ , we can use Lemma K.1 to show that  $H_p(\tilde{\theta}_*) \bar{\mathbf{R}}_0 \tilde{\theta} = c_{*,1} H_p(\tilde{\theta}_*) \bar{\mathbf{R}}_0 \tilde{\theta}_* + o_{\mathbb{P}}(1)$ . Also, by Lemma K.5, we have  $H_p(\tilde{\theta}_*) \bar{\mathbf{R}}_0 (\tilde{\theta}_*) = o(1)$  in probability if  $p \neq 1$ , which proves the lemma.

For the case  $s = 2$ , we define  $\tilde{\beta} = \beta / \|\beta\|_2$  and write

$$H_p(\tilde{\theta}_*) \bar{\mathbf{R}}_0 (\tilde{\theta})^{\circ 2} = \|\beta\|_2^2 H_p(\tilde{\theta}_*) \bar{\mathbf{R}}_0 (\tilde{\mathbf{X}} \tilde{\beta})^{\circ 2} = \|\beta\|_2^2 H_p(\tilde{\theta}_*) \bar{\mathbf{R}}_0 H_2(\tilde{\mathbf{X}} \tilde{\beta}) + o_{\mathbb{P}}(1).$$

Now, we define  $\beta_{\perp} = \frac{\beta_* - \langle \beta_*, \tilde{\beta} \rangle \tilde{\beta}}{\|\beta_* - \langle \beta_*, \tilde{\beta} \rangle \tilde{\beta}\|_2}$ , and set

$$\hat{\mathbf{X}} = \tilde{\mathbf{X}} - \tilde{\mathbf{X}} \tilde{\beta} \tilde{\beta}^\top - \tilde{\mathbf{X}} \beta_{\perp} \beta_{\perp}^\top.$$

By construction, we have  $\hat{\mathbf{X}} \perp \tilde{\mathbf{X}} \tilde{\beta}, \tilde{\theta}_*$ . Based on Conjecture 4.3, we can again replace  $\mathbf{F}_0$  with  $\mathbf{F}_0 = c_1 \tilde{\mathbf{X}} \mathbf{W}_0^\top + c_{>1} \mathbf{Z}$ , where  $\mathbf{Z} \in \mathbb{R}^{n \times d}$  is an independent random matrix with  $\mathcal{N}(0, 1)$  entries. Again, we define  $\hat{\mathbf{F}}_0$  as in equation 35. Thus,  $\hat{\mathbf{F}}_0 = \mathbf{F}_0 - c_1 \tilde{\mathbf{X}} \tilde{\beta} (\mathbf{W}_0 \tilde{\beta})^\top - c_1 \tilde{\mathbf{X}} \beta_{\perp} (\mathbf{W}_0 \beta_{\perp})^\top$ . As a consequence, we also have  $\mathbf{F}_0 \mathbf{F}_0^\top = \hat{\mathbf{F}}_0 \hat{\mathbf{F}}_0^\top + \mathbf{V} \mathbf{D} \mathbf{V}^\top$ , where  $\mathbf{V} = [\tilde{\mathbf{X}} \tilde{\beta} \quad \tilde{\mathbf{X}} \beta_{\perp} \quad \hat{\mathbf{F}}_0 \mathbf{W}_0 \tilde{\beta} \quad \hat{\mathbf{F}}_0 \mathbf{W}_0 \beta_{\perp}] \in \mathbb{R}^{n \times 4}$  and

$$\mathbf{D} = \begin{bmatrix} c_1^2 \langle \mathbf{W}_0 \tilde{\beta}, \mathbf{W}_0 \tilde{\beta} \rangle & c_1^2 \langle \mathbf{W}_0 \tilde{\beta}, \mathbf{W}_0 \beta_{\perp} \rangle & c_1 & 0 \\ c_1^2 \langle \mathbf{W}_0 \tilde{\beta}, \mathbf{W}_0 \beta_{\perp} \rangle & c_1^2 \langle \mathbf{W}_0 \beta_{\perp}, \mathbf{W}_0 \beta_{\perp} \rangle & 0 & c_1 \\ c_1 & 0 & 0 & 0 \\ 0 & c_1 & 0 & 0 \end{bmatrix}.$$



Using the Woodbury formula, we find that equation 36 still holds. We can write

$$\begin{aligned} H_p(\tilde{\boldsymbol{\theta}}_\star)^\top \hat{\mathbf{R}}_0 H_2(\tilde{\mathbf{X}}\tilde{\boldsymbol{\beta}}) &= H_p(\tilde{\boldsymbol{\theta}}_\star)^\top \hat{\mathbf{R}}_0 H_2(\tilde{\mathbf{X}}\tilde{\boldsymbol{\beta}}) \\ &\quad - H_p(\tilde{\boldsymbol{\theta}}_\star)^\top \hat{\mathbf{R}}_0 \mathbf{V} (\mathbf{D}^{-1} + \mathbf{V}^\top \hat{\mathbf{R}}_0 \mathbf{V})^{-1} \mathbf{V}^\top \hat{\mathbf{R}}_0 H_2(\tilde{\mathbf{X}}\tilde{\boldsymbol{\beta}}). \end{aligned} \quad (39)$$

The first term converges to zero for any  $p \neq 2$ , analogously to the argument in Section K.2.1 for the term (1,2).

To prove that the second term will also converge to zero, we first observe that the elements of  $\mathbf{K} = (\mathbf{D}^{-1} + \mathbf{V}^\top \hat{\mathbf{R}}_0 \mathbf{V})^{-1}$  are all  $O_{\mathbb{P}}(1)$ . The second term will involve quantities of the form

$$[\mathbf{K}]_{i,j} H_p(\tilde{\boldsymbol{\theta}}_\star)^\top \hat{\mathbf{R}}_0 \mathbf{v}_i \mathbf{v}_j^\top \hat{\mathbf{R}}_0 H_2(\tilde{\mathbf{X}}\tilde{\boldsymbol{\beta}}),$$

where  $\mathbf{v}_i$ , for  $i \in \{1, 2, 3, 4\}$ , is the  $i$ -th column of the matrix  $\mathbf{V} = [\tilde{\mathbf{X}}\tilde{\boldsymbol{\beta}} \quad \tilde{\mathbf{X}}\tilde{\boldsymbol{\beta}}_\perp \quad \hat{\mathbf{F}}_0 \mathbf{W}_0 \tilde{\boldsymbol{\beta}} \quad \hat{\mathbf{F}}_0 \mathbf{W}_0 \boldsymbol{\beta}_\perp]$ . We can argue that all these terms converge to zero, as follows:

- The terms where  $j = 1$  converge to zero because  $(\tilde{\mathbf{X}}\tilde{\boldsymbol{\beta}})^\top \hat{\mathbf{R}}_0 H_2(\tilde{\mathbf{X}}\tilde{\boldsymbol{\beta}})$  converges to zero analogously to the argument in Section K.2.1 for the term (1,2). The same argument applies to the terms where  $j = 2$ , via the convergence of  $(\tilde{\mathbf{X}}\tilde{\boldsymbol{\beta}}_\perp)^\top \hat{\mathbf{R}}_0 H_2(\tilde{\mathbf{X}}\tilde{\boldsymbol{\beta}})$  to zero.
- For  $j = 3, 4$ , since  $H_2(\tilde{\mathbf{X}}\tilde{\boldsymbol{\beta}})$  is independent of  $\hat{\mathbf{R}}_0 [\hat{\mathbf{F}}_0 \mathbf{W}_0 \tilde{\boldsymbol{\beta}} \quad \hat{\mathbf{F}}_0 \mathbf{W}_0 \boldsymbol{\beta}_\perp]$ , and has zero-mean i.i.d. entries, it also follows that these entries converge to zero in probability.

Finally we study  $H_2(\tilde{\boldsymbol{\theta}}_\star)^\top \hat{\mathbf{R}}_0 \tilde{\boldsymbol{\theta}}^{\circ 2}$ , by analyzing the terms in equation 39 for  $p = 2$ .

For  $H_2(\tilde{\boldsymbol{\theta}}_\star)^\top \hat{\mathbf{R}}_0 H_2(\tilde{\mathbf{X}}\tilde{\boldsymbol{\beta}})$ , since  $H_2(\tilde{\boldsymbol{\theta}}_\star)$ ,  $H_2(\tilde{\mathbf{X}}\tilde{\boldsymbol{\beta}})$  are independent of  $\hat{\mathbf{R}}_0$ , it follows from Lemma K.3, as in the analysis of term (1,2) in Section K.2, that  $H_2(\tilde{\boldsymbol{\theta}}_\star)^\top \hat{\mathbf{R}}_0 H_2(\tilde{\mathbf{X}}\tilde{\boldsymbol{\beta}}) - \mathbb{E} \hat{\mathbf{R}}_0 \cdot \mathbb{E} H_2(\tilde{\boldsymbol{\theta}}_\star)^\top H_2(\tilde{\mathbf{X}}\tilde{\boldsymbol{\beta}}) \rightarrow_P 0$ . Now notice that  $\hat{\mathbf{F}}_0$  is left-orthogonally invariant in distribution, and thus  $\hat{\mathbf{R}}_0 =_d \mathbf{O} \hat{\mathbf{R}}_0 \mathbf{O}^\top$ , where  $\mathbf{O}$  is uniformly distributed over the Haar measure of  $n$ -dimensional orthogonal matrices, independently of all other randomness. Hence,  $\mathbb{E} \hat{\mathbf{R}}_0 = \mathbb{E} \text{tr} \hat{\mathbf{R}}_0 \mathbf{I}_n / n$ . Moreover, from the Woodbury formula in equation 21,

$$\begin{aligned} |\text{tr} \bar{\mathbf{R}}_0 - \text{tr} \hat{\mathbf{R}}_0| &\leq |\text{tr} \hat{\mathbf{R}}_0 \mathbf{V} (\mathbf{D}^{-1} + \mathbf{V}^\top \hat{\mathbf{R}}_0 \mathbf{V})^{-1} \mathbf{V}^\top \hat{\mathbf{R}}_0| \\ &\leq |\text{tr} (\mathbf{D}^{-1} + \mathbf{V}^\top \hat{\mathbf{R}}_0 \mathbf{V})^{-1} \mathbf{V}^\top \mathbf{V}| \cdot \|\hat{\mathbf{R}}_0\|_{\text{op}}^2. \end{aligned}$$

From our previous analysis and as the entries of  $\mathbf{V}^\top \mathbf{V}$  are  $O_{\mathbb{P}}(n)$ , it follows that the first term is  $O_{\mathbb{P}}(n)$ ; whereas  $\|\hat{\mathbf{R}}_0\|_{\text{op}}^2 = O(1/n^2)$ . Hence,  $|\text{tr} \bar{\mathbf{R}}_0 - \text{tr} \hat{\mathbf{R}}_0| \rightarrow_P 0$ , and thus by the bounded convergence theorem  $|\mathbb{E} \text{tr} \bar{\mathbf{R}}_0 - \mathbb{E} \text{tr} \hat{\mathbf{R}}_0| \rightarrow_P 0$ . Moreover, we have already argued in the proof of Lemma K.4 that  $\mathbb{E} \text{tr} \bar{\mathbf{R}}_0 \rightarrow \psi m_1 / \phi$ .

Further, by Lemmas C.1 and K.1,

$$\begin{aligned} \mathbb{E} H_2(\tilde{\boldsymbol{\theta}}_\star)^\top H_2(\tilde{\mathbf{X}}\tilde{\boldsymbol{\beta}}) &= n \cdot \mathbb{E} H_2(\tilde{\mathbf{x}}_1^\top \boldsymbol{\beta}_\star) H_2(\tilde{\mathbf{x}}_1^\top \tilde{\boldsymbol{\beta}}) \\ &= 2n \mathbb{E} (\boldsymbol{\beta}_\star^\top \tilde{\boldsymbol{\beta}})^2 = 2n \mathbb{E} \frac{(\boldsymbol{\beta}_\star^\top \tilde{\boldsymbol{\beta}})^2}{\|\tilde{\boldsymbol{\beta}}\|^2} = 2n \frac{c_{\star,1}^2}{\phi(c_\star^2 + \sigma_\varepsilon^2) + c_{\star,1}^2} + o_{\mathbb{P}}(1). \end{aligned}$$

This shows that

$$H_2(\tilde{\boldsymbol{\theta}}_\star)^\top \hat{\mathbf{R}}_0 H_2(\tilde{\mathbf{X}}\tilde{\boldsymbol{\beta}}) \rightarrow_P 2 \frac{\psi m_1}{\phi} \frac{c_{\star,1}^2}{\phi(c_\star^2 + \sigma_\varepsilon^2) + c_{\star,1}^2}.$$

Next, we consider  $H_2(\tilde{\boldsymbol{\theta}}_\star)^\top \hat{\mathbf{R}}_0 \mathbf{V}$  with  $\mathbf{V} = [\tilde{\mathbf{X}}\tilde{\boldsymbol{\beta}} \quad \tilde{\mathbf{X}}\tilde{\boldsymbol{\beta}}_\perp \quad \hat{\mathbf{F}}_0 \mathbf{W}_0 \tilde{\boldsymbol{\beta}} \quad \hat{\mathbf{F}}_0 \mathbf{W}_0 \boldsymbol{\beta}_\perp]$ . For the first two entries of the vector  $H_2(\tilde{\boldsymbol{\theta}}_\star)^\top \hat{\mathbf{R}}_0 \mathbf{V}$ , an analysis very similar to the one above for  $H_2(\tilde{\boldsymbol{\theta}}_\star)^\top \hat{\mathbf{R}}_0 H_2(\tilde{\mathbf{X}}\tilde{\boldsymbol{\beta}})$  shows that they converge to zero in probability. For the last two entries, since  $H_2(\tilde{\boldsymbol{\theta}}_\star)$  is independent of  $\hat{\mathbf{R}}_0 [\hat{\mathbf{F}}_0 \mathbf{W}_0 \tilde{\boldsymbol{\beta}} \quad \hat{\mathbf{F}}_0 \mathbf{W}_0 \boldsymbol{\beta}_\perp]$ , and has zero-mean i.i.d. entries, it also follows that these entries converge to zero in probability. Moreover, the limiting entries of  $(\mathbf{D}^{-1} + \mathbf{V}^\top \hat{\mathbf{R}}_0 \mathbf{V})^{-1}$  have been shown to be bounded in our above analysis. Hence, the second term converges to zero in probability.

Now, note that  $\tilde{\beta} = \beta/\|\beta\|_2$ . From Lemma K.1,  $\|\beta\|^2 \rightarrow_P \phi(c_*^2 + \sigma_\varepsilon^2) + c_{*,1}^2$ . Hence,

$$H_2(\tilde{\theta}_*)^\top \hat{\mathbf{R}}_0 H_2(\tilde{\mathbf{X}}\tilde{\beta}) = 2 \frac{\psi m_1}{\phi} \frac{c_{*,1}^2 \|\beta\|_2^2}{\phi(c_*^2 + \sigma_\varepsilon^2) + c_{*,1}^2} + o_{\mathbb{P}}(1) \rightarrow_P \frac{2c_{*,1}^2 \psi m_1}{\phi},$$

which concludes the proof.

## N.9 PROOF OF LEMMA K.8

As in the proof of Lemma K.6, we define  $\hat{\mathbf{X}} = \tilde{\mathbf{X}} - \tilde{\theta}\tilde{\beta}^\top$ . By construction, we have  $\hat{\mathbf{X}} \perp \tilde{\theta}$ . As in the proof of Lemma K.5, based on Conjecture 4.3, we can replace  $\mathbf{F}_0$  with  $c_1 \mathbf{X} \mathbf{W}_0^\top + c_{>1} \mathbf{Z}$  in our computations without changing the limiting result, where  $\mathbf{Z} \in \mathbb{R}^{n \times d}$  is an independent random matrix with  $N(0, 1)$  entries. Thus, from now on, we denote  $\mathbf{F}_0 = c_1 \mathbf{X} \mathbf{W}_0^\top + c_{>1} \mathbf{Z}$ . We define  $\hat{\mathbf{F}}_0$  as in equation 35; thus,  $\hat{\mathbf{F}}_0 = \mathbf{F}_0 - c_1 \tilde{\theta}(\mathbf{W}_0 \beta)^\top$ . As a consequence, we can write  $\mathbf{F}_0 \mathbf{F}_0^\top = \hat{\mathbf{F}}_0 \hat{\mathbf{F}}_0^\top + \mathbf{V} \mathbf{D} \mathbf{V}^\top$ , where  $\mathbf{V} = [\hat{\mathbf{F}}_0 \mathbf{W}_0 \beta \quad \tilde{\theta}] \in \mathbb{R}^{n \times 2}$  and

$$\mathbf{D} = \begin{bmatrix} 0 & c_1 \\ c_1 & c_1^2 \|\mathbf{W}_0 \beta\|_2^2 \end{bmatrix}.$$

Using the Woodbury formula, we find that equation 36 still holds. Now, we can write

$$\tilde{\theta}^{\circ 2 \top} \hat{\mathbf{R}}_0 \tilde{\theta}^{\circ 2} = \tilde{\theta}^{\circ 2 \top} \hat{\mathbf{R}}_0 \tilde{\theta}^{\circ 2} - \tilde{\theta}^{\circ 2 \top} \hat{\mathbf{R}}_0 \mathbf{V} (\mathbf{D}^{-1} + \mathbf{V}^\top \hat{\mathbf{R}}_0 \mathbf{V})^{-1} \mathbf{V}^\top \hat{\mathbf{R}}_0 \tilde{\theta}^{\circ 2}. \quad (40)$$

We can analyze each term in the above sum separately.

By Lemma K.3,  $\tilde{\theta}^{\circ 2 \top} \hat{\mathbf{R}}_0 \tilde{\theta}^{\circ 2} - \mathbb{E} \tilde{\theta}^{\circ 2 \top} \hat{\mathbf{R}}_0 \tilde{\theta}^{\circ 2} \rightarrow_P 0$ . Further, conditional on  $\beta$ ,  $\mathbb{E} \tilde{\theta}^{\circ 2 \top} \hat{\mathbf{R}}_0 \tilde{\theta}^{\circ 2} = 3\|\beta\|_2^4 \mathbb{E} \text{tr} \hat{\mathbf{R}}_0$ ; and as in the proof of Lemma K.7,  $\mathbb{E} \text{tr} \hat{\mathbf{R}}_0 - \mathbb{E} \text{tr} \bar{\mathbf{R}}_0 \rightarrow 0$ . Moreover, we have already argued in the proof of Lemma K.4 that  $\mathbb{E} \text{tr} \bar{\mathbf{R}}_0 \rightarrow \psi m_1 / \phi$ . In addition, from Lemma K.1,  $\|\beta\|^2 \rightarrow_P \phi(c_*^2 + \sigma_\varepsilon^2) + c_{*,1}^2$ . Hence,

$$\tilde{\theta}^{\circ 2 \top} \hat{\mathbf{R}}_0 \tilde{\theta}^{\circ 2} \rightarrow_P 3\psi m_1 [\phi(c_*^2 + \sigma_\varepsilon^2) + c_{*,1}^2]^2 / \phi.$$

To analyze the second term in equation 40, we first study  $\tilde{\theta}^{\circ 2 \top} \hat{\mathbf{R}}_0 \hat{\mathbf{F}}_0 \mathbf{W}_0 \beta$ . By an argument similar to the ones above, we can show that it concentrates around  $\mathbf{1}_n^\top \hat{\mathbf{R}}_0 \hat{\mathbf{F}}_0 \mathbf{W}_0 \beta = \mathbf{1}_n^\top \hat{\mathbf{F}}_0 \hat{\mathbf{R}}_0 \mathbf{W}_0 \beta$ . Since  $\hat{\mathbf{F}}_0$  is left-orthogonally invariant,  $\mathbf{1}_n^\top \hat{\mathbf{F}}_0 \hat{\mathbf{R}}_0 \mathbf{W}_0 \beta =_d \mathbf{1}_n^\top \mathbf{O} \hat{\mathbf{F}}_0 \hat{\mathbf{R}}_0 \mathbf{W}_0 \beta$ , where  $\mathbf{O}$  is uniformly distributed over the Haar measure of  $n$ -dimensional orthogonal matrices, independently of all other randomness. Then, it follows as in the analysis of term (1,2) from Section K.2 that  $\mathbf{1}_n^\top \mathbf{O} \hat{\mathbf{F}}_0 \hat{\mathbf{R}}_0 \mathbf{W}_0 \beta \rightarrow_P 0$ ; and hence  $\tilde{\theta}^{\circ 2 \top} \hat{\mathbf{R}}_0 \hat{\mathbf{F}}_0 \mathbf{W}_0 \beta \rightarrow_P 0$ .

Moreover, the limiting entries of  $(\mathbf{D}^{-1} + \mathbf{V}^\top \hat{\mathbf{R}}_0 \mathbf{V})^{-1}$  can be shown to be bounded by a simple orderwise analysis. Hence, the second term in equation 40 is  $o_{\mathbb{P}}(1)$ .

## N.10 PROOF OF LEMMA L.2

Denoting  $\tilde{\beta} = \beta/\|\beta\|_2$ , we have

$$\begin{aligned} (\tilde{\mathbf{X}}\tilde{\beta})^{\circ i \top} \hat{\mathbf{R}}_0 (\tilde{\mathbf{X}}\tilde{\beta})^{\circ j} &= \|\beta\|_2^{i+j} (\tilde{\mathbf{X}}\tilde{\beta})^{\circ i \top} \hat{\mathbf{R}}_0 (\tilde{\mathbf{X}}\tilde{\beta})^{\circ j} \\ &= \|\beta\|_2^{i+j} \sum_{k_1=0}^i \sum_{k_2=0}^j \xi_{i,k_1} \xi_{j,k_2} H_{k_1}(\tilde{\mathbf{X}}\tilde{\beta})^\top \hat{\mathbf{R}}_0 H_{k_2}(\tilde{\mathbf{X}}\tilde{\beta}) \\ &= \|\beta\|_2^{i+j} \sum_{k=0}^{\min(i,j)} \xi_{j,k} \xi_{i,k} H_k(\tilde{\mathbf{X}}\tilde{\beta})^\top \hat{\mathbf{R}}_0 H_k(\tilde{\mathbf{X}}\tilde{\beta}) + o_{\mathbb{P}}(1) \\ &= \|\beta\|_2^{i+j} \left[ \xi_{i,1} \xi_{j,1} (\tilde{\mathbf{X}}\tilde{\beta})^\top \hat{\mathbf{R}}_0 (\tilde{\mathbf{X}}\tilde{\beta}) + \sum_{k=0, k \neq 1}^{\min(i,j)} \xi_{i,k} \xi_{j,k} H_k(\tilde{\mathbf{X}}\tilde{\beta})^\top \hat{\mathbf{R}}_0 H_k(\tilde{\mathbf{X}}\tilde{\beta}) \right] + o_{\mathbb{P}}(1). \end{aligned}$$

The third line follows from Lemma K.5. Now, we claim that for any  $p \in \{0, 2, 3, \dots\}$ , we have  $H_p(\tilde{\mathbf{X}}\tilde{\beta}/\|\beta\|_2)^\top \hat{\mathbf{R}}_0 H_p(\tilde{\mathbf{X}}\tilde{\beta}/\|\beta\|_2) \rightarrow_P p! \psi m_1 / \phi$ . Using this claim, the facts that  $\|\beta\|_2^2 \rightarrow_P$

$c_{\star,1}^2 + \phi(c_{\star}^2 + \sigma_{\varepsilon}^2)$ , and  $\text{tr}(\tilde{\mathbf{X}}^\top (\mathbf{F}_0 \mathbf{F}_0^\top + \lambda n \mathbf{I}_n)^{-1} \tilde{\mathbf{X}}) / d \rightarrow_P \psi m_2 / \phi$ , we can conclude

$$(\tilde{\mathbf{X}}\tilde{\boldsymbol{\beta}})^{\circ i \top} \tilde{\mathbf{R}}_0 (\tilde{\mathbf{X}}\tilde{\boldsymbol{\beta}})^{\circ j} \rightarrow_P (c_{\star,1}^2 + \phi(c_{\star}^2 + \sigma_{\varepsilon}^2))^{(i+j)/2} \left[ \xi_{i,1} \xi_{j,1} \frac{\psi m_2}{\phi} + \frac{\psi m_1}{\phi} \sum_{k=0, k \neq 1}^{\min(i,j)} k! \xi_{i,k} \xi_{j,k} \right].$$

Now, it remains to prove the claim that for any  $p \in \{0, 2, 3, \dots\}$ , we have

$$H_p(\tilde{\mathbf{X}}\tilde{\boldsymbol{\beta}} / \|\tilde{\boldsymbol{\beta}}\|_2)^\top \tilde{\mathbf{R}}_0 H_p(\tilde{\mathbf{X}}\tilde{\boldsymbol{\beta}} / \|\tilde{\boldsymbol{\beta}}\|_2) \rightarrow_P p! \psi m_1 / \phi.$$

As in the proof of Lemma K.8, we define  $\hat{\mathbf{X}} = \tilde{\mathbf{X}} - \tilde{\mathbf{X}}\tilde{\boldsymbol{\beta}}\tilde{\boldsymbol{\beta}}^\top$ . By construction, we have  $\hat{\mathbf{X}} \perp \tilde{\mathbf{X}}\tilde{\boldsymbol{\beta}}$ . As in the proof of Lemma K.5, based on Conjecture 4.3, we can replace  $\mathbf{F}_0$  with  $c_1 \tilde{\mathbf{X}} \mathbf{W}_0^\top + c_{>1} \mathbf{Z}$  in our computations without changing the limiting result, where  $\mathbf{Z} \in \mathbb{R}^{n \times d}$  is an independent random matrix with  $N(0, 1)$  entries. Thus, from now on, we denote  $\mathbf{F}_0 = c_1 \tilde{\mathbf{X}} \mathbf{W}_0^\top + c_{>1} \mathbf{Z}$ . We define  $\hat{\mathbf{F}}_0$  as in equation 35; thus,  $\hat{\mathbf{F}}_0 = \mathbf{F}_0 - c_1 \tilde{\mathbf{X}}\tilde{\boldsymbol{\beta}}(\mathbf{W}_0\tilde{\boldsymbol{\beta}})^\top$ . As a consequence, we can write  $\mathbf{F}_0 \mathbf{F}_0^\top = \hat{\mathbf{F}}_0 \hat{\mathbf{F}}_0^\top + \mathbf{V} \mathbf{D} \mathbf{V}^\top$ , where  $\mathbf{V} = [\hat{\mathbf{F}}_0 \mathbf{W}_0 \tilde{\boldsymbol{\beta}} \quad \tilde{\mathbf{X}}\tilde{\boldsymbol{\beta}}] \in \mathbb{R}^{n \times 2}$  and

$$\mathbf{D} = \begin{bmatrix} 0 & c_1 \\ c_1 & c_1^2 \|\mathbf{W}_0 \tilde{\boldsymbol{\beta}}\|_2^2 \end{bmatrix}.$$

Using the Woodbury formula, we find that equation 36 still holds. Now, we can write

$$\begin{aligned} & H_p(\tilde{\mathbf{X}}\tilde{\boldsymbol{\beta}})^\top \tilde{\mathbf{R}}_0 H_p(\tilde{\mathbf{X}}\tilde{\boldsymbol{\beta}}) \\ &= H_p(\tilde{\mathbf{X}}\tilde{\boldsymbol{\beta}})^\top \hat{\mathbf{R}}_0 H_p(\tilde{\mathbf{X}}\tilde{\boldsymbol{\beta}}) - H_p(\tilde{\mathbf{X}}\tilde{\boldsymbol{\beta}})^\top \hat{\mathbf{R}}_0 \mathbf{V} (\mathbf{D}^{-1} + \mathbf{V}^\top \hat{\mathbf{R}}_0 \mathbf{V})^{-1} \mathbf{V}^\top \hat{\mathbf{R}}_0 H_p(\tilde{\mathbf{X}}\tilde{\boldsymbol{\beta}}). \end{aligned} \quad (41)$$

We can analyze each term in the above sum separately.

By Lemma K.3,  $H_p(\tilde{\mathbf{X}}\tilde{\boldsymbol{\beta}})^\top \hat{\mathbf{R}}_0 H_p(\tilde{\mathbf{X}}\tilde{\boldsymbol{\beta}}) - \mathbb{E} H_p(\tilde{\mathbf{X}}\tilde{\boldsymbol{\beta}})^\top \hat{\mathbf{R}}_0 H_p(\tilde{\mathbf{X}}\tilde{\boldsymbol{\beta}}) \rightarrow_P 0$ . Further, conditional on  $\tilde{\boldsymbol{\beta}}$ , and using C.1, we have

$$\mathbb{E} H_p(\tilde{\mathbf{X}}\tilde{\boldsymbol{\beta}})^\top \hat{\mathbf{R}}_0 H_p(\tilde{\mathbf{X}}\tilde{\boldsymbol{\beta}}) = \mathbb{E} \text{tr} \left[ \hat{\mathbf{R}}_0 H_p(\tilde{\mathbf{X}}\tilde{\boldsymbol{\beta}}) H_p(\tilde{\mathbf{X}}\tilde{\boldsymbol{\beta}})^\top \right] = p! \mathbb{E} \text{tr} \left[ \hat{\mathbf{R}}_0 \right],$$

and as in the proof of Lemma K.7,  $\mathbb{E} \text{tr} \hat{\mathbf{R}}_0 - \mathbb{E} \text{tr} \tilde{\mathbf{R}}_0 \rightarrow 0$ . Moreover, we have already argued in the proof of Lemma K.4 that  $\mathbb{E} \text{tr} \tilde{\mathbf{R}}_0 \rightarrow \psi m_1 / \phi$ . Hence,

$$H_p(\tilde{\mathbf{X}}\tilde{\boldsymbol{\beta}})^\top \hat{\mathbf{R}}_0 H_p(\tilde{\mathbf{X}}\tilde{\boldsymbol{\beta}}) \rightarrow_P p! \psi m_1 / \phi.$$

To analyze the second term in equation 41, we first study  $H_p(\tilde{\mathbf{X}}\tilde{\boldsymbol{\beta}})^\top \hat{\mathbf{R}}_0 \hat{\mathbf{F}}_0 \mathbf{W}_0 \tilde{\boldsymbol{\beta}}$ . Conditional on  $\tilde{\boldsymbol{\beta}}$ ,  $H_p(\tilde{\mathbf{X}}\tilde{\boldsymbol{\beta}})$  is a vector with independent mean-zero, bounded variance entries, independent of the vector  $\hat{\mathbf{R}}_0 \hat{\mathbf{F}}_0 \mathbf{W}_0 \tilde{\boldsymbol{\beta}}$  that has norm  $O(1/\sqrt{n})$ . Hence, we conclude that this term goes to zero. Next, note that  $H_p(\tilde{\mathbf{X}}\tilde{\boldsymbol{\beta}})^\top \hat{\mathbf{R}}_0 (\tilde{\mathbf{X}}\tilde{\boldsymbol{\beta}}) \rightarrow_P 0$  using Lemma K.3 and Lemma C.1. Moreover, the limiting entries of  $(\mathbf{D}^{-1} + \mathbf{V}^\top \hat{\mathbf{R}}_0 \mathbf{V})^{-1}$  can be shown to be bounded by a simple orderwise analysis. Hence, the second term in equation 41 is  $o_{\mathbb{P}}(1)$ . This concludes the proof.

#### N.11 PROOF OF LEMMA L.3

We define  $\boldsymbol{\beta}_\perp = \frac{\boldsymbol{\beta}_\star - \langle \boldsymbol{\beta}_\star, \tilde{\boldsymbol{\beta}} \rangle \tilde{\boldsymbol{\beta}}}{\|\boldsymbol{\beta}_\star - \langle \boldsymbol{\beta}_\star, \tilde{\boldsymbol{\beta}} \rangle \tilde{\boldsymbol{\beta}}\|_2}$ , and set

$$\hat{\mathbf{X}} = \tilde{\mathbf{X}} - \tilde{\mathbf{X}}\tilde{\boldsymbol{\beta}}\tilde{\boldsymbol{\beta}}^\top - \tilde{\mathbf{X}}\boldsymbol{\beta}_\perp\boldsymbol{\beta}_\perp^\top.$$

By construction, we have  $\hat{\mathbf{X}} \perp \tilde{\mathbf{X}}\tilde{\boldsymbol{\beta}}, \boldsymbol{\theta}_\star$ . Based on Conjecture 4.3, we can again replace  $\mathbf{F}_0$  with  $\mathbf{F}_0 = c_1 \tilde{\mathbf{X}} \mathbf{W}_0^\top + c_{>1} \mathbf{Z}$ , where  $\mathbf{Z} \in \mathbb{R}^{n \times d}$  is an independent random matrix with  $N(0, 1)$  entries. Again, we define  $\hat{\mathbf{F}}_0$  as in equation 35. Thus,  $\hat{\mathbf{F}}_0 = \mathbf{F}_0 - c_1 \tilde{\mathbf{X}}\tilde{\boldsymbol{\beta}}(\mathbf{W}_0\tilde{\boldsymbol{\beta}})^\top - c_1 \tilde{\mathbf{X}}\boldsymbol{\beta}_\perp(\mathbf{W}_0\boldsymbol{\beta}_\perp)^\top$ . As a consequence, we also have  $\mathbf{F}_0 \mathbf{F}_0^\top = \hat{\mathbf{F}}_0 \hat{\mathbf{F}}_0^\top + \mathbf{V} \mathbf{D} \mathbf{V}^\top$ , where  $\mathbf{V} = [\tilde{\mathbf{X}}\tilde{\boldsymbol{\beta}} \quad \tilde{\mathbf{X}}\boldsymbol{\beta}_\perp \quad \hat{\mathbf{F}}_0 \mathbf{W}_0 \tilde{\boldsymbol{\beta}} \quad \hat{\mathbf{F}}_0 \mathbf{W}_0 \boldsymbol{\beta}_\perp] \in \mathbb{R}^{n \times 4}$  and

$$\mathbf{D} = \begin{bmatrix} c_1^2 \langle \mathbf{W}_0 \tilde{\boldsymbol{\beta}}, \mathbf{W}_0 \tilde{\boldsymbol{\beta}} \rangle & c_1^2 \langle \mathbf{W}_0 \tilde{\boldsymbol{\beta}}, \mathbf{W}_0 \boldsymbol{\beta}_\perp \rangle & c_1 & 0 \\ c_1^2 \langle \mathbf{W}_0 \tilde{\boldsymbol{\beta}}, \mathbf{W}_0 \boldsymbol{\beta}_\perp \rangle & c_1^2 \langle \mathbf{W}_0 \boldsymbol{\beta}_\perp, \mathbf{W}_0 \boldsymbol{\beta}_\perp \rangle & 0 & c_1 \\ c_1 & 0 & 0 & 0 \\ 0 & c_1 & 0 & 0 \end{bmatrix}.$$

Using the Woodbury formula, we find that equation 36 still holds. We can write

$$\begin{aligned} H_p(\tilde{\theta}_*)^\top \hat{\mathbf{R}}_0 H_q(\tilde{\mathbf{X}}\tilde{\beta}) &= H_p(\tilde{\theta}_*)^\top \hat{\mathbf{R}}_0 H_q(\tilde{\mathbf{X}}\tilde{\beta}) \\ &\quad - H_p(\tilde{\theta}_*)^\top \hat{\mathbf{R}}_0 \mathbf{V} (\mathbf{D}^{-1} + \mathbf{V}^\top \hat{\mathbf{R}}_0 \mathbf{V})^{-1} \mathbf{V}^\top \hat{\mathbf{R}}_0 H_q(\tilde{\mathbf{X}}\tilde{\beta}). \end{aligned} \quad (42)$$

$p \neq q$  **case:** The first term converges to zero for any  $p \neq q$ , analogously to the argument in Section K.2.1 for the terms (1,2) and (2,4). In particular, for  $p = 0$ , we can use orthogonal invariance as in the analysis of the term (2,4). To prove that the second term will also converge to zero when  $p \neq q$ , we first observe that the elements of  $\mathbf{K} = (\mathbf{D}^{-1} + \mathbf{V}^\top \hat{\mathbf{R}}_0 \mathbf{V})^{-1}$  are all  $O(1)$ . The second term will involve quantities of the form

$$[\mathbf{K}]_{i,j} H_p(\tilde{\theta}_*)^\top \hat{\mathbf{R}}_0 \mathbf{v}_i \mathbf{v}_j^\top \hat{\mathbf{R}}_0 H_q(\tilde{\mathbf{X}}\tilde{\beta}),$$

where  $\mathbf{v}_i$ , for  $i \in \{1, 2, 3, 4\}$ , is the  $i$ -th column of the matrix  $\mathbf{V} = [\tilde{\mathbf{X}}\tilde{\beta} \quad \tilde{\mathbf{X}}\beta_\perp \quad \hat{\mathbf{F}}_0 \mathbf{W}_0 \tilde{\beta} \quad \hat{\mathbf{F}}_0 \mathbf{W}_0 \beta_\perp]$ . We can argue that all these terms converge to zero, as follows. Because  $p \neq q$ , without loss of generality, assume that  $q \neq 1$ .

- The terms where  $j = 1$  converge to zero because  $(\tilde{\mathbf{X}}\tilde{\beta})^\top \hat{\mathbf{R}}_0 H_q(\tilde{\mathbf{X}}\tilde{\beta})$  converges to zero using the concentration argument from Lemma K.3 and the orthogonality of Hermite polynomials from Lemma C.1. The same argument applies to the terms where  $j = 2$ , via the convergence of  $(\tilde{\mathbf{X}}\beta_\perp)^\top \hat{\mathbf{R}}_0 H_q(\tilde{\mathbf{X}}\tilde{\beta})$  to zero.
- For  $j = 3, 4$ , and for  $q > 0$ , since  $H_q(\tilde{\mathbf{X}}\tilde{\beta})$  is independent of  $\hat{\mathbf{R}}_0[\hat{\mathbf{F}}_0 \mathbf{W}_0 \tilde{\beta} \quad \hat{\mathbf{F}}_0 \mathbf{W}_0 \beta_\perp]$ , and has zero-mean i.i.d. entries, it also follows that these entries converge to zero in probability. For  $q = 0$ , we can again use orthogonal invariance as in the analysis of the term (2,4).

**The case when  $p = q \neq 1$ :** Finally we study  $H_p(\tilde{\theta}_*)^\top \hat{\mathbf{R}}_0 H_p(\tilde{\mathbf{X}}\tilde{\beta})$ , by analyzing the terms in equation 39.

For  $H_p(\tilde{\theta}_*)^\top \hat{\mathbf{R}}_0 H_p(\tilde{\mathbf{X}}\tilde{\beta})$ , since  $H_p(\tilde{\theta}_*)$ ,  $H_p(\tilde{\mathbf{X}}\tilde{\beta})$  are independent of  $\hat{\mathbf{R}}_0$ , it follows from Lemma K.3, as in the analysis of term (1,2) in the Section K.2, that  $H_p(\tilde{\theta}_*)^\top \hat{\mathbf{R}}_0 H_p(\tilde{\mathbf{X}}\tilde{\beta}) - \mathbb{E} \hat{\mathbf{R}}_0 \cdot \mathbb{E} H_p(\tilde{\theta}_*)^\top H_p(\tilde{\mathbf{X}}\tilde{\beta}) \rightarrow_P 0$ . Now notice that  $\hat{\mathbf{F}}_0$  is left-orthogonally invariant in distribution, and thus  $\hat{\mathbf{R}}_0 =_d \mathbf{O} \hat{\mathbf{R}}_0 \mathbf{O}^\top$ , where  $\mathbf{O}$  is uniformly distributed over the Haar measure of  $n$ -dimensional orthogonal matrices, independently of all other randomness. Hence,  $\mathbb{E} \hat{\mathbf{R}}_0 = \mathbb{E} \text{tr} \hat{\mathbf{R}}_0 \mathbf{I}_n / n$ . Also, similar to the proof of Lemma K.7, we have  $|\text{tr} \hat{\mathbf{R}}_0 - \text{tr} \hat{\mathbf{R}}_0| = o_{\mathbb{P}}(1)$ . Moreover, we have already argued in the proof of Lemma K.4 that  $\mathbb{E} \text{tr} \hat{\mathbf{R}}_0 \rightarrow \psi m_1 / \phi$ . Further, by Lemmas C.1 and K.1,

$$H_p(\tilde{\theta}_*)^\top \hat{\mathbf{R}}_0 H_p(\tilde{\mathbf{X}}\tilde{\beta}) \rightarrow_P p! \frac{\psi m_1}{\phi} \left( \frac{c_{*,1}}{\sqrt{\phi(c_*^2 + \sigma_\varepsilon^2) + c_{*,1}^2}} \right)^p.$$

Next, we consider  $H_2(\tilde{\theta}_*)^\top \hat{\mathbf{R}}_0 \mathbf{V}$  with  $\mathbf{V} = [\tilde{\mathbf{X}}\tilde{\beta} \quad \tilde{\mathbf{X}}\beta_\perp \quad \hat{\mathbf{F}}_0 \mathbf{W}_0 \tilde{\beta} \quad \hat{\mathbf{F}}_0 \mathbf{W}_0 \beta_\perp]$ . For the first two entries of the vector  $H_p(\tilde{\theta}_*)^\top \hat{\mathbf{R}}_0 \mathbf{V}$ , an analysis very similar to the one above for  $H_p(\tilde{\theta}_*)^\top \hat{\mathbf{R}}_0 H_p(\tilde{\mathbf{X}}\tilde{\beta})$  shows that they converge to zero in probability. For the last two entries, since  $H_p(\tilde{\theta}_*)$  is independent of  $\hat{\mathbf{R}}_0[\hat{\mathbf{F}}_0 \mathbf{W}_0 \tilde{\beta} \quad \hat{\mathbf{F}}_0 \mathbf{W}_0 \beta_\perp]$ , and has zero-mean i.i.d. entries, it also follows that these entries converge to zero in probability. Moreover, the limiting entries of  $(\mathbf{D}^{-1} + \mathbf{V}^\top \hat{\mathbf{R}}_0 \mathbf{V})^{-1}$  have been shown to be bounded in our above analysis. Hence, the second term converges to zero in probability.

**The case when  $p = q = 1$ :** In this case, we have

$$(\tilde{\mathbf{X}}\beta_*)^\top \hat{\mathbf{R}}_0(\tilde{\mathbf{X}}\tilde{\beta}) = \frac{(\tilde{\mathbf{X}}\beta_*)^\top \hat{\mathbf{R}}_0(\tilde{\mathbf{X}}\tilde{\beta})}{\|\beta\|_2} = \frac{c_{*,1} \frac{\psi m_2}{\phi}}{\sqrt{\phi(c_*^2 + \sigma_\varepsilon^2) + c_{*,1}^2}} + o_{\mathbb{P}}(1),$$

using Lemma K.1 and by arguments similar to the ones in the proof of Lemma K.4.

Putting everything together concludes the proof.

## O ADDITIONAL EXPERIMENTS

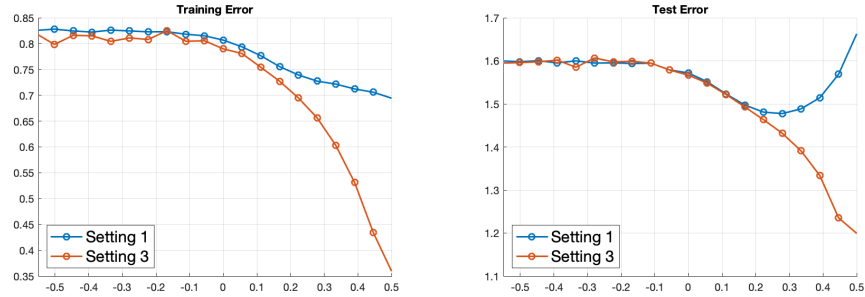

Figure 4: We repeat the experiments in Figure 3 (Left, Middle) with  $y = H_1(\beta_*^\top \mathbf{x}) + \frac{1}{\sqrt{6}}H_3(\beta_*^\top \mathbf{x})$  as setting 3. Here we use the activation  $\sigma(x) = \frac{e^x - e^{-x}}{e^x + e^{-x}}$  so that  $c_3 \neq 0$ .

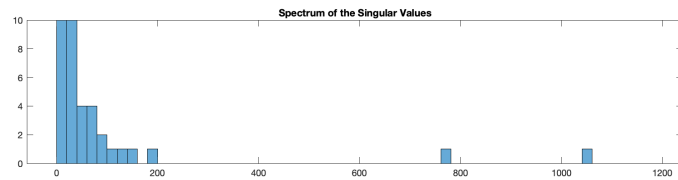

Figure 5: We repeat the experiment in Figure 2 with the MNIST dataset. Although the MNIST dataset does not satisfy our theoretical conditions (Gaussian input, single-index model, etc.), we empirically observe similar phenomena such as emergence of spikes after one-step gradient update.

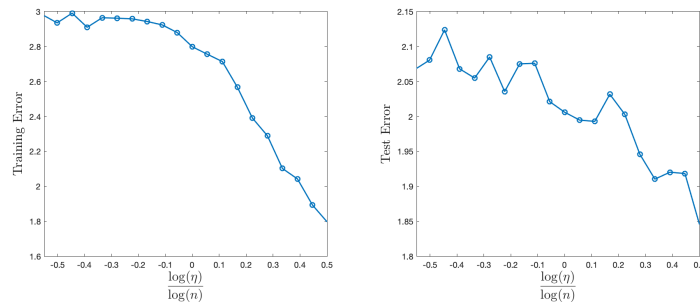

Figure 6: We plot the training and test error of a two-layer neural network ( $N = 1000$ ) trained on the MNIST dataset with one step of gradient descent of varying step size. In order to make the experiments compatible with our theoretical setup, the model is trained using the MSE loss. We demonstrate that huge step size can still be beneficial in this more realistic problem.

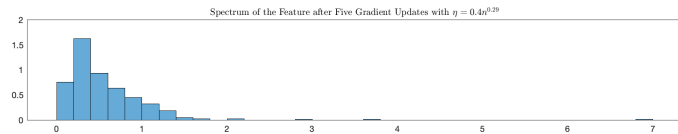

Figure 7: Singular value spectrum of the feature matrix after 5 gradient updates. We use the same experimental setting as Figure 2.
